# Supplementary material for: Anaerobic Degradation of Sulfated Polysaccharides by Two Novel Kiritimatiellales Strains Isolated From Black Sea Sediment
Source: Front Microbiol. 2019 Feb 18;10:253. doi: 10.3389/fmicb.2019.00253 (PMC6388578; doi:10.3389/fmicb.2019.00253)
Supplement: Supplementary file 2 [file Data_Sheet_2.xlsx]

## Sheet: enrichments; 0.01% MRB
Table S2. Community analysis by 16S rRNA gene amplicon sequencing of the inoculum and negative control enrichments.
polysaccharide enrichments
relative abundancies of taxa, with minimum relative abundance of OTUs set to 0.01%
sample nomenclature: cellulose B 1 denotes: cellulose enrichment, biological replicate B, technical replicate 1
taxon	cellulose A	cellulose B 1	cellulose B 2	chitin A	chitin B 1	chitin B 2	fucoidan A	fucoidan B 1	fucoidan B 2	laminarin A	laminarin B 1	laminarin B 2	pullulan A 1	pullulan A 2	pullulan B 1	pullulan B 2	xylan A 1	xylan A 2	xylan B 1	xylan B 2	mucin	chondroitin 4-sulfate	i-carrageenan
k__Bacteria;p__Proteobacteria;c__Gammaproteobacteria;o__Alteromonadales;f__Psychromonadaceae;g__Psychromonas	0.000310553	0.000364953	0	0.000282188	0.000264759	0.00015027	0.000214649	0	0	0.800618	0.799147	0.784334	0.738107	0.739586	0.660208	0.707231	0.0285595	0.0293719	0.0344088	0.035852	0.0276579	0.0712149	0.103025
k__Bacteria;p__Bacteroidetes;c__Bacteroidia;o__Bacteroidales;f__Marinilabiliaceae;g__Carboxylicivirga	0.105708	0.124599	0.163743	0.553787	0.469986	0.364085	0.000467178	0.0001755	0.000155882	0.000155727	0.000642965	0.000241402	0.000464634	0.000467797	0.000502191	0.000135007	0.000205781	0.000184923	0	0.000336065	0.145265	0.0511062	0.000155921
k__Bacteria;p__Proteobacteria;c__Deltaproteobacteria;o__Desulfovibrionales;f__Desulfovibrionaceae;g__Halodesulfovibrio	0.000631123	0.000486604	0.000119879	0.00531702	0.0705847	0.179563	0.00909102	0.0140805	0.0193507	0.142957	0.145558	0.15491	0.16258	0.154058	0.23766	0.216344	0.195205	0.217222	0.184916	0.175441	0.00896051	0.0834032	0.0011889
k__Bacteria;p__Kiritimatiellaeota;c__Kiritimatiellae;o__Kiritimatiellales;f__Kiritimatiellaceae;g__R76-B128	0	0	0	0.000118816	0	0	0.503681	0.404568	0.329408	0	0	0	0	0	0.00017218	0	0.000499754	0.000462307	0	0	0.167322	0.000630561	0.315604
k__Bacteria;p__Firmicutes;c__Clostridia;o__Clostridiales;f__Lachnospiraceae;g__uncultured	0.390355	0.391969	0.389777	0.00194561	0.00121789	0.000120216	0.0102779	0.0152415	0.0222841	0.00109009	0.00211886	0.00339141	0.000314918	0.000282291	0.000320445	0.000124622	0.0145002	0.00869136	0.0622297	0.0614694	0.00211285	0.00179172	0.0283192
k__Bacteria;p__Bacteroidetes;c__Bacteroidia;o__Bacteroidales;f__Marinifilaceae;g__Marinifilum	0.0583238	0.0442342	0.037522	0.00150005	0.00267406	0.00975756	0.0878294	0.0788536	0.0564507	0.00516494	0.0071749	0.00811347	0.0112906	0.0111505	0.0142048	0.00858855	0.299	0.28324	0.302787	0.315359	0.004913	0.0243919	0.12195
k__Bacteria;p__Bacteroidetes;c__Bacteroidia;o__Bacteroidales;f__Prolixibacteraceae;g__Draconibacterium	0.0716275	0.0625754	0.0311057	0.000490116	0.00518927	0.0147966	0.100809	0.123215	0.154508	0.000700771	0.000993673	0.000747758	0.000449146	0.000391175	0.000330011	0.000166163	0.00295443	0.00175677	0.00314189	0.00307041	0.0336273	0.00256069	0.00305995
k__Bacteria;p__Bacteroidetes;c__Bacteroidia;o__Bacteroidales;f__Marinilabiliaceae;g__	0.00333594	0.00411742	0.00434418	0.0106786	0.00845904	0.00543979	0.111062	0.173111	0.228099	0.000155727	0	0	0.000206504	0.000185506	0	0	0.00626162	0.0045306	0.00344595	0.00335301	0.00164191	0.510777	0.000370313
k__Bacteria;p__Spirochaetes;c__Spirochaetia;o__Spirochaetales;f__Spirochaetaceae;g__Spirochaeta_2	0.00160285	0.00156275	0.00141571	0.110529	0.0671031	0.00420757	0.0431066	0.0527041	0.0520293	0.000285499	0.000423772	0.00110103	0.000908617	0.00115336	0.0013057	0.00030117	0.190671	0.225914	0.136216	0.143485	0.0130335	0.00323739	0.00502846
k__Bacteria;p__Firmicutes;c__Clostridia;o__Clostridiales;f__Ruminococcaceae;g__GCA-900066225	0	0	0	0.000103964	0.112337	0.247465	0	0	0	0	0.000336095	0	0.00013939	0.000112916	0.000105221	0	0	0	0	0	0	0	0
k__Bacteria;p__Proteobacteria;c__Deltaproteobacteria;o__Desulfovibrionales;f__Desulfovibrionaceae;g__Desulfovibrio	0.0559396	0.0536388	0.00907653	0.0913992	0.0706244	0.0120016	0.0259599	0.0266355	0.0283493	0.00023359	0.000716029	0.000512244	0.00675784	0.00855745	0.00784374	0.00440332	0.000683487	0.001202	0.00474662	0.00362798	0.0330419	0.00133802	0.123334
k__Bacteria;p__Firmicutes;c__Clostridia;o__Clostridiales;f__Defluviitaleaceae;g__Defluviitaleaceae_UCG-011	0.00461822	0.00404256	0.00238616	0.00589624	0.02081	0.0554899	0.00790414	0.00935551	0.00953717	0.00225804	0.00321482	0.00433935	0.00431593	0.0044844	0.00182223	0.0011216	0.159568	0.123867	0.10902	0.107373	0.00227831	0.0385949	0.00109145
k__Bacteria;p__Spirochaetes;c__Spirochaetia;o__Spirochaetales;f__Spirochaetaceae;g__	0.0204264	0.085998	0.201385	0.00755967	0.00298515	0	0.00226013	0.003051	0.00383329	0	0	0	0	0	0	0	0.00190347	0.00523947	0.00216216	0.0021997	0	0	0.000487253
k__Bacteria;p__FCPU426;c__uncultured_bacterium;o__<empty>;f__<empty>;g__	0.0313057	0.0220001	0.0158411	0	0	0	0	0	0	0	0	0	0	0	0	0	0	0	0	0	0	0	0
k__Bacteria;p__Bacteroidetes;c__Bacteroidia;o__Bacteroidales;f__Bacteroidetes_BD2-2;g__uncultured_bacterium	0.117269	0.0741136	0.0313683	0	0	0	0	0	0	0	0	0	0	0	0	0	0	0	0	0	0	0	0
k__Bacteria;p__Proteobacteria;c__Deltaproteobacteria;o__Desulfobacterales;f__Desulfobacteraceae;g__Desulfobacter	0	0	0	0.000118816	0	0	0	0	0	0	0	0	0	0	0.000100438	0	0	0	0	0.000145119	0.0886377	0.010089	0
k__Bacteria;p__Firmicutes;c__Clostridia;o__Clostridiales;f__;g__	0.038739	0.0364392	0.0281487	0.0007426	0.00117156	0.00304548	0	0	0.000262166	0.000882452	0.000964447	0.00113636	0.00860605	0.00822677	0.00171701	0.00150585	0.00120529	0.0015102	0.00212838	0.0016956	0	0	0.000370313
k__Bacteria;p__Aegiribacteria;c__uncultured_bacterium;o__<empty>;f__<empty>;g__<empty>	0.000731302	0.000917062	0.000279717	0	0	0	0	0	0	0	0	0	0	0	0	0	0	0	0	0	0.000152736	0.00125343	0.00107196
k__Bacteria;p__Bacteroidetes;c__Bacteroidia;o__Bacteroidales;f__;g__	0.00312556	0.00410806	0.00346507	0	0.000344186	0.000851533	0.0118183	0.0185625	0.0236162	0	0	0	0	0	0	0	0.00086722	0.00067805	0.000692568	0.000504098	0	0.0124959	0.148885
k__Bacteria;p__Fibrobacteres;c__Chitinivibrionia;o__Chitinivibrionales;f__Chitinivibrionaceae;g__possible_genus_03	0	0	0	0.110098	0.0679172	0	0	0	0	0	0	0	0	0	0	0	0	0	0	0	0	0	0
k__Bacteria;p__Proteobacteria;c__Deltaproteobacteria;o__Desulfovibrionales;f__Desulfovibrionaceae;g__	0.00497886	0.00578311	0.00128442	0.0103964	0.0105506	0.00913645	0.00212124	0.001647	0.00279171	0.00960316	0.00736487	0.00720674	0.00540524	0.00540789	0.00687762	0.0105202	0.00329984	0.00825988	0.00346284	0.00419318	0.0012728	0.00185323	0.00518438
k__Bacteria;p__Firmicutes;c__Clostridia;o__Clostridiales;f__Family_XII;g__Fusibacter	0.000540963	0.000598898	0.000485224	0.00253969	0.00180698	0.0019435	0.00236114	0.0016065	0.00104158	0.00799398	0.00618123	0.00697123	0.00846666	0.00719439	0.0119378	0.013158	0.00236648	0.00194169	0.00114865	0.000878352	0.00926598	0.0428627	0.000331332
k__Bacteria;p__Firmicutes;c__Clostridia;o__Clostridiales;f__Clostridiales_Incertae_Sedis;g__Dethiosulfatibacter	0.000611088	0.000795411	0.000296843	0.00112875	0.00137013	0.00253456	0.0035354	0.004185	0.0034365	0.00134963	0.00201657	0.00294982	0.00866284	0.00790012	0.00526104	0.00264822	0.00396863	0.00265056	0.00609797	0.00542287	0.0021383	0.015218	0.000311842
k__Bacteria;p__Proteobacteria;c__Deltaproteobacteria;o__Desulfobacterales;f__Desulfobulbaceae;g__Desulfobulbus	0.00102182	0.000683118	0.000159838	0.00549524	0.00320358	0	0.00429298	0.00514351	0	0	0	0	0	0	0	0	0.00156541	0.00218825	0.00185811	0.0019171	0.00440388	0.0345962	0.00450222
k__Bacteria;p__Cyanobacteria;c__Melainabacteria;o__Gastranaerophilales;f__uncultured_organism;g__	0	0	0	0	0	0	0	0	0	0	0	0	0	0	0	0	0	0	0	0	0	0	0
k__Bacteria;p__Proteobacteria;c__Deltaproteobacteria;o__Desulfobacterales;f__Desulfobacteraceae;g__Desulfoconvexum	0.00610086	0.00424843	0.000776358	0.00421797	0.00234311	0.000220397	0.000542936	0.000945001	0	0	0	0	0	0	0	0	0.000485055	0.000585588	0.00131757	0.00154284	0.00804409	0.0120652	0.00853668
k__Bacteria;p__Firmicutes;c__Clostridia;o__Clostridiales;f__livecontrolB21;g__uncultured_bacterium	0	0	0	0	0.00473256	0.0144159	0	0.0002025	0.00055976	0	0	0	0	0	0	0	0.00190347	0.00147938	0.000777027	0.000817249	0	0	0.00183207
NA;p__;c__;o__;f__;g__	0.00500892	0.00747686	0.0119308	0.00280703	0.00238945	0.00300541	0.0115027	0.00976051	0.0111739	0	0	0	0	0	0	0	0.00332189	0.0081366	0.00248311	0.00295585	0.00238013	0.000484455	0.00444375
k__Bacteria;p__Lentisphaerae;c__Oligosphaeria;o__Oligosphaerales;f__Oligosphaeraceae;g__uncultured_bacterium	0	0	0	0	0	0	0	0	0	0	0	0	0	0	0	0	0	0	0	0	0.149859	0.000192244	0
k__Bacteria;p__Bacteroidetes;c__Bacteroidia;o__Bacteroidales;f__Prolixibacteraceae;g__Sunxiuqinia	0	0	0	0	0	0	0	0	0	0	0	0	0	0	0	0	0	0	0	0	0.141115	0	0
k__Bacteria;p__Firmicutes;c__Clostridia;o__Clostridiales;f__GoM-GC232-4463-Bac1;g__	0.000340606	0.00239559	0.00115312	0.0040546	0.00187317	0.000200361	0.000113638	0.0002835	0.00049599	0	0	0	0	0	0	0	0.000183733	0.000184923	0.000152027	0.000129843	0.0028638	0.000184554	0.00128635
k__Bacteria;p__Bacteroidetes;c__Bacteroidia;o__Bacteroidales;f__SB-5;g__uncultured_organism	0.0240328	0.0245922	0.0355184	0	0	0	0	0	0	0	0	0	0	0	0	0	0	0	0	0	0	0	0
k__Bacteria;p__Firmicutes;c__Clostridia;o__Clostridiales;f__Lachnospiraceae;g__	0.00483861	0.00952622	0.0111658	0.000475264	0.00142308	0.0042777	0.000795465	0.000580501	0.00113369	0	0.000263031	0	0	0	0	0	0.00043361	0.00110954	0.00518581	0.00661437	0	0.00107657	0.00183207
k__Bacteria;p__Bacteroidetes;c__Bacteroidia;o__Sphingobacteriales;f__Lentimicrobiaceae;g__	0	0	0	0	0.00608283	0.0198658	0	0	0	0.000207636	0.000233805	0	0	0.000149211	0.00134396	0.000747733	0	0	0	0	0.00110734	0.000438317	0.000136431
k__Bacteria;p__Proteobacteria;c__Deltaproteobacteria;o__Desulfobacterales;f__Desulfobacteraceae;g__Desulfobacterium	0	0	0.000125587	0.000995084	0.000602326	0	0.000265155	0.000621001	0	0.0014275	0.00191428	0.00168982	0.0115487	0.0198451	0.00776721	0.00348942	0.000440959	0.000493127	0.00314189	0.00391058	0.00453116	0.00153026	0.000506744
k__Bacteria;p__Proteobacteria;c__Deltaproteobacteria;o__Desulfovibrionales;f__Desulfomicrobiaceae;g__Desulfomicrobium	0	0	0	0.0299119	0.0190494	0	0	0	0	0	0	0	0	0	0	0	0	0	0	0	0	0	0
k__Bacteria;p__Firmicutes;c__Clostridia;o__Clostridiales;f__Ruminococcaceae;g__	0.000550981	0.000402384	0.000256883	0	0.0164547	0.0303947	0	0	0	0	0	0	0	0	0	0	0	0	0	0	0	0	0
k__Bacteria;p__Bacteroidetes;c__Bacteroidia;o__Bacteroidales;f__Bacteroidetes_BD2-2;g__	0.0147863	0.00909576	0.00297413	0	0	0	0.000227276	0.000945001	0.00131083	0	0	0	0	0	0	0	0	0	0	0	0	0.00208393	0
k__Bacteria;p__Bacteroidetes;c__Bacteroidia;o__Bacteroidales;f__Marinifilaceae;g__uncultured	0	0	0	0	0	0	0.000138891	0.000135	0	0	0	0.000141309	0	0	0	0	0.0181822	0.0112803	0.0187838	0.018537	0.00025456	0.00246072	0
k__Bacteria;p__Bacteroidetes;c__Bacteroidia;o__Bacteroidales;f__Marinifilaceae;g__	0.00299533	0.00127266	0.00163263	0	0	0	0.00299246	0.00162	0.000800669	0.000467181	0	0.000306169	0.000247805	0.000250029	0	0.000373867	0.00499019	0.00906121	0.00461149	0.00486531	0	0	0.0175021
k__Bacteria;p__Firmicutes;c__Clostridia;o__Clostridiales;f__Defluviitaleaceae;g__	0.000220392	0	0.000188381	0.000267336	0.00234973	0.0065017	0.000946982	0.000850501	0.000892781	0.000103818	0.000540675	0.00041215	0.000340731	0.000435535	0.000105221	0	0.0100759	0.0153178	0.00523649	0.00491113	0	0.00292211	0
k__Bacteria;p__Bacteroidetes;c__Bacteroidia;o__Sphingobacteriales;f__ADurb.Bin408;g__uncultured_bacterium	0	0	0	0	0	0	0	0	0	0	0	0	0	0	0	0	0	0	0	0	0	0	0
k__Bacteria;p__Proteobacteria;c__Deltaproteobacteria;o__Desulfobacterales;f__Desulfobacteraceae;g__	0.00110196	0.000243302	0	0.00154461	0.000721467	0	0.000858597	0.0013365	0.001325	0.00023359	0.000292257	0.000418038	0.00195146	0.00207282	0.00173136	0.00128776	0	0	0.000287162	0.000404806	0.0108442	0.00226079	0.00220239
k__Bacteria;p__Epsilonbacteraeota;c__Campylobacteria;o__Campylobacterales;f__Thiovulaceae;g__Sulfurimonas	0.000631123	0.000598898	0	0.000727748	0.000489803	0.000571028	0.00135103	0.003402	0.00616444	0.000363363	0.000482223	0.000447477	0.000356219	0.000403273	0.000468711	0.0002804	0.000712884	0.000647229	0.000557432	0.000809611	0.000916415	0.00353729	0.00955017
k__Bacteria;p__Bacteroidetes;c__Bacteroidia;o__Bacteroidales;f__Prolixibacteraceae;g__	0.00379676	0.00401449	0.00129583	0	0.00161503	0.00332599	0.00525259	0.00832951	0.0113227	0	0	0	0	0	0	0	0	0	0	0	0.00234195	0.0012765	0
k__Bacteria;p__Bacteroidetes;c__Bacteroidia;o__Bacteroidales;f__Marinilabiliaceae;g__Labilibacter	0	0	0	0	0	0	0	0	0	0.00101222	0.000759867	0.00068888	0	0	0.000124352	0	0	0	0.0223649	0.0235016	0	0	0.000526234
k__Bacteria;p__Proteobacteria;c__Gammaproteobacteria;o__Oceanospirillales;f__Nitrincolaceae;g__	0	0	0	0	0	0	0	0	0	0.00807184	0.00625429	0.0065473	0.0028291	0.00274629	0.00365403	0.00778889	0.000279274	0.000493127	0	0.000442995	0	0	0
k__Bacteria;p__Kiritimatiellaeota;c__Kiritimatiellae;o__Kiritimatiellales;f__Kiritimatiellaceae;g__	0	0	0	0	0	0	0.0108587	0.0046845	0.00818383	0	0	0	0	0	0	0	0	0	0	0	0.00874413	0	0.00649022
k__Bacteria;p__Firmicutes;c__Clostridia;o__Clostridiales;f__Lachnospiraceae;g__Anaerosporobacter	0	0	0	0	0	0	0	0	0	0	0	0	0	0	0	0	0	0.000123282	0.0101689	0.012717	0	0	0
k__Bacteria;p__Bacteroidetes;c__Bacteroidia;o__Bacteroidetes_VC2.1_Bac22;f__uncultured_bacterium;g__<empty>	0.000170303	0.000196513	0.000222632	0	0.000198569	0.000641154	0	0	0	0.000337408	0.000116903	0	0.000232317	0.00031052	0.000411318	0.000186933	0	0	0.000185811	0.000221497	0	0	0
k__Bacteria;p__Proteobacteria;c__Deltaproteobacteria;o__Desulfobacterales;f__Desulfobacteraceae;g__uncultured	0.00261465	0.00174055	0.000176964	0	0	0	0	0	0	0	0.00020458	0.000211963	0	0.000189538	0.000153049	0	0.00011024	0	0.000456081	0.0005652	0.000343656	0	0.000233882
k__Bacteria;p__Planctomycetes;c__Phycisphaerae;o__MSBL9;f__4572-13;g__uncultured_bacterium	0	0	0	0	0	0	0	0	0	0	0	0	0	0	0	0	0	0	0	0	0.0454644	0.000215313	0
k__Bacteria;p__Spirochaetes;c__Spirochaetia;o__Spirochaetales;f__Spirochaetaceae;g__Sediminispirochaeta	0.000851516	0	0	0.000252484	0	0	0.00385106	0.0034425	0.000765241	0	0	0	0	0	0	0	0.000316021	0.000184923	0	0.000274962	0.00193465	0.000599802	0.00220239
k__Bacteria;p__Proteobacteria;c__Gammaproteobacteria;o__Alteromonadales;f__Psychromonadaceae;g__	0	0	0	0	0	0	0	0	0	0.00352981	0.00230883	0.00207253	0.00135776	0.00171391	0.00118134	0.00263784	0.00101421	0.00175677	0.00217905	0.00177198	0	0.00128419	0.00214392
k__Bacteria;p__Chloroflexi;c__Anaerolineae;o__Thermoflexales;f__Thermoflexaceae;g__Thermoflexus	0.000591052	0.000495962	0	0.000623784	0.000516279	0	0.000795465	0.001134	0.000772327	0	0.000394546	0.000365047	0.00204439	0.00283501	0.00234834	0.000602341	0.00200636	0.000862972	0.00344595	0.00320026	0	0.000499835	0
k__Bacteria;p__Tenericutes;c__Mollicutes;o__Izimaplasmatales;f__Izimaplasmataceae;g__uncultured_bacterium	0	0	0	0	0	0	0	0	0	0	0	0	0	0	0	0	0	0	0	0	0	0	0
k__Bacteria;p__Fusobacteria;c__Fusobacteriia;o__Fusobacteriales;f__Fusobacteriaceae;g__Psychrilyobacter	0	0	0	0	0	0	0.000315661	0.0002835	0.000247995	0.000103818	0.000233805	0.000276729	0.000629837	0.000685564	0.00644717	0.00389444	0	0	0	0	0.00784044	0.0122806	0.000565214
k__Bacteria;p__Chloroflexi;c__Anaerolineae;o__Anaerolineales;f__Anaerolineaceae;g__uncultured	0.000490874	0.000449173	0	0.000920824	0.000714848	0	0.000315661	0.000756001	0.000807754	0.000103818	0.000292257	0.000123645	0.000640162	0.000858971	0.000923074	0.000155778	0.000720233	0.000400666	0.00405405	0.00215387	0.00025456	0.000361419	0.000155921
k__Bacteria;p__Fibrobacteres;c__Chitinivibrionia;o__Chitinivibrionales;f__Chitinivibrionaceae;g__	0	0	0	0.0226196	0.0120399	0	0	0	0	0	0	0	0	0	0	0	0	0	0	0	0	0	0
k__Bacteria;p__Firmicutes;c__Clostridia;o__Clostridiales;f__Clostridiaceae_1;g__Clostridium_sensu_stricto_7	0	0	0	0	0	0.000290523	0.000189396	0.0002025	0.000432219	0.00051909	0.000540675	0.000500468	0.00244191	0.00196394	0.00163092	0.000436178	0.00392454	0.00197251	0.00243243	0.00200875	0.00012728	0.00469076	0
k__Bacteria;p__Bacteroidetes;c__Bacteroidia;o__Sphingobacteriales;f__Lentimicrobiaceae;g__uncultured_bacterium	0.000490874	0.000215229	0	0	0	0	0	0	0	0	0	0	0	0	0	0	0	0	0	0	0	0	0.000253372
k__Bacteria;p__Kiritimatiellaeota;c__Kiritimatiellae;o__Kiritimatiellales;f__Kiritimatiellaceae;g__MSBL3	0	0	0	0	0	0	0.00218437	0.0018225	0	0	0	0	0	0	0	0	0	0	0	0	0	0	0.0262337
k__Bacteria;p__Proteobacteria;c__Gammaproteobacteria;o__;f__;g__	0	0	0	0	0	0	0	0	0	0.00308858	0.00292257	0.00274963	0.00110996	0.000992051	0.00165962	0.00267938	0.000227829	0.000523947	0.000152027	0.000221497	0.000165464	0	0.000253372
k__Bacteria;p__Firmicutes;c__Clostridia;o__Clostridiales;f__Family_XIII;g__Anaerovorax	0	0	0	0	0.000158855	0.000450811	0	0	0	0	0	0	0.000314918	0.000455698	0	0	0.000624692	0.000585588	0.000827703	0.000870714	0.000814591	0.00266066	0
k__Bacteria;p__Firmicutes;c__Clostridia;o__Clostridiales;f__Lachnospiraceae;g__Cellulosilyticum	0	0	0	0	0	0	0	0	0	0	0	0	0	0	0	0	0.0126923	0.0101707	0.00256757	0.00174907	0	0	0
k__Bacteria;p__Bacteroidetes;c__Bacteroidia;o__Bacteroidales;f__SB-5;g__	0.00156278	0.00136624	0.00212927	0	0	0	0.00343439	0.0044685	0.00447099	0	0	0	0	0	0	0	0.000169034	0.000400666	0.000152027	0.000221497	0	0.00268373	0.0043463
k__Bacteria;p__Proteobacteria;c__Gammaproteobacteria;o__Betaproteobacteriales;f__Burkholderiaceae;g__Delftia	0.000160285	0	0	0.00014852	0.000119141	0	0	0	0.000155882	0	0.000336095	0	0.00380483	0.00242367	0.00438101	0.000197319	0.00282214	0.000246564	0.00579392	0.0036738	0	0	0
k__Bacteria;p__Firmicutes;c__Clostridia;o__Clostridiales;f__Lachnospiraceae;g__Anaerocolumna	0	0	0	0	0	0	0	0	0	0	0	0	0	0	0	0	0	0	0.00662162	0.00715666	0	0	0
k__Bacteria;p__Firmicutes;c__Clostridia;o__Clostridiales;f__JTB215;g__bacterium_enrichment_culture_clone_AOM-SR-B4	0	0	0	0	0	0	0.0064521	0.00518401	0	0	0	0	0	0	0	0	0	0	0	0	0.000241832	0	0
k__Bacteria;p__Proteobacteria;c__Deltaproteobacteria;o__Desulfarculales;f__Desulfarculaceae;g__Desulfatiglans	0.000681213	0.000524035	0.000148421	0.00139609	0.000522898	0.000490884	0.00125002	0.001755	0.0011762	0	0	0.000506356	0.000702113	0.000725891	0.00103786	0	0.00151396	0.000739691	0.00170608	0.00177962	0.000140008	0.000761287	0
k__Bacteria;p__Bacteroidetes;c__Bacteroidia;o__;f__;g__	0.000470838	0	0	0	0.000463328	0.000961731	0.0086491	0.0044415	0.00222487	0	0	0	0	0	0	0	0	0	0	0	0	0.00735141	0
k__Bacteria;p__Proteobacteria;c__Gammaproteobacteria;o__Vibrionales;f__Vibrionaceae;g__Photobacterium	0	0	0	0	0	0	0	0	0	0	0	0	0	0	0	0	0	0	0	0	0.0245268	0.000484455	0
k__Archaea;p__Euryarchaeota;c__Methanomicrobia;o__Methanosarcinales;f__Methanosarcinaceae;g__Methanococcoides	0	0	0	0	0	0	0	0	0	0	0	0	0	0	0	0	0.00238118	0.00215743	0.00505068	0.00567492	0	0	0
k__Bacteria;p__Epsilonbacteraeota;c__Campylobacteria;o__Campylobacterales;f__Sulfurospirillaceae;g__Sulfurospirillum	0	0	0	0	0	0	0	0	0	0	0	0	0	0	0	0	0	0	0	0	0.00196011	0.00066132	0.0218095
k__Bacteria;p__Bacteroidetes;c__Bacteroidia;o__Bacteroidales;f__Bacteroidetes_BD2-2;g__uncultured_Bacteroidetes_bacterium	0.00256456	0.00151596	0.00133579	0	0	0	0	0	0	0	0	0	0	0	0	0	0	0	0	0	0	0	0
k__Bacteria;p__Proteobacteria;c__Deltaproteobacteria;o__Desulfovibrionales;f__Desulfovibrionaceae;g__Desulfocurvus	0	0	0	0.00197532	0.00144955	0	0	0	0	0	0	0	0	0	0	0	0	0	0	0	0.00259651	0	0.0105442
k__Bacteria;p__Proteobacteria;c__Deltaproteobacteria;o__Desulfobacterales;f__Desulfobulbaceae;g__	0.00171305	0.000870273	0	0.000995084	0.000403757	0	0.000719706	0.000324	0.000162968	0	0	0	0	0	0	0	0.000117589	0	0	0	0	0.00106119	0.00111094
k__Bacteria;p__Proteobacteria;c__Gammaproteobacteria;o__Oceanospirillales;f__Nitrincolaceae;g__uncultured	0	0	0	0	0	0	0	0	0	0.00212827	0.0015928	0.00193711	0.000846666	0.000863004	0.000990033	0.00250283	0.000286624	0.000462307	0.00035473	0	0	0	0
k__Bacteria;p__Proteobacteria;c__Gammaproteobacteria;o__Oceanospirillales;f__Halomonadaceae;g__Halomonas	0	0	0	0	0	0	0	0	0	0	0	0	0.000237479	0.0002218	0.000258269	0	0.000411562	0	0.00238176	0.000763784	0	0	0
k__Bacteria;p__Tenericutes;c__Mollicutes;o__Izimaplasmatales;f__Izimaplasmataceae;g__Izimaplasma	0	0	0	0	0	0	0	0	0	0	0	0	0	0	0	0	0	0	0	0	0	0	0
k__Bacteria;p__Firmicutes;c__Clostridia;o__Clostridiales;f__Ruminococcaceae;g__Ruminiclostridium_1	0	0	0	0	0	0	0	0	0	0	0	0	0	0	0	0	0.00168299	0.000955434	0.000185811	0	0	0	0
k__Bacteria;p__Planctomycetes;c__Phycisphaerae;o__MSBL9;f__SM23-30;g__	0	0	0	0	0	0	0	0	0	0	0	0	0	0	0	0	0	0	0	0	0.0134917	0.000284521	0
k__Bacteria;p__Proteobacteria;c__Deltaproteobacteria;o__Desulfuromonadales;f__Desulfuromonadaceae;g__Pelobacter	0.000380678	0.000374311	0	0.000193076	0.000416995	0.000631136	0.000757585	0.001485	0.000991979	0	0.000160741	0.000153084	0	0.000217767	0.00017218	0.000238859	0.000139637	0	0	0.000160395	0	0.000353729	0.00200748
k__Bacteria;p__Bacteroidetes;c__Bacteroidia;o__Bacteroidales;f__Marinilabiliaceae;g__uncultured	0.00123219	0.000617613	0	0	0	0	0	0	0	0	0	0	0	0	0	0	0	0	0.000101351	0.000152757	0.00025456	0.000845874	0
k__Bacteria;p__Firmicutes;c__Clostridia;o__Clostridiales;f__Ruminococcaceae;g__uncultured	0	0	0	0	0	0	0	0	0	0	0	0	0	0	0	0	0	0	0.000236486	0.000229135	0	0	0
k__Bacteria;p__Proteobacteria;c__Gammaproteobacteria;o__Xanthomonadales;f__Xanthomonadaceae;g__Stenotrophomonas	0	0	0	0	0	0	0	0	0	0	0.000189967	0	0.0017811	0.00122595	0.00204702	0	0.00131553	0.000215743	0.00255068	0.00155812	0	0	0
k__Bacteria;p__Acidobacteria;c__Aminicenantia;o__Aminicenantales;f__uncultured_bacterium;g__<empty>	0	0	0	0.00044556	0.00012576	0	0.000164143	0.000432	0.000283423	0	0	0	0.00081569	0.0004436	0.00081307	0.000166163	0.000801076	0.000770511	0.00130068	0.000977644	0	0	0
k__Bacteria;p__Firmicutes;c__Clostridia;o__Clostridiales;f__Lachnospiraceae;g__Tyzzerella	0	0	0	0	0	0	0	0	0	0.00111604	0.00162202	0.00199598	0.000320081	0.000334717	0.00121004	0.000664652	0	0	0.000185811	0	0	0	0
k__Bacteria;p__Atribacteria;c__JS1;o__uncultured_bacterium;f__<empty>;g__<empty>	0	0	0	0.00029704	0	0	0.000467178	0.000567001	0.000403877	0	0	0.000253178	0.000490447	0.000528288	0.000468711	0	0.00105095	0.000832152	0.000912162	0.000801974	0	0	0.000175411
k__Bacteria;p__Zixibacteria;c__uncultured_bacterium;o__<empty>;f__<empty>;g__<empty>	0.000250446	0.000280733	0	0.00044556	0.000456709	0	0.000214649	0.00027	0.000403877	0.00023359	0.00010229	0	0.000149715	0.000479895	0.000502191	0	0.000293973	0	0.00111486	0.000809611	0.000178192	0.000407558	0.000136431
k__Bacteria;p__Proteobacteria;c__Gammaproteobacteria;o__Betaproteobacteriales;f__Burkholderiaceae;g__	0	0	0	0	0	0	0	0	0	0	0	0	0.000665975	0.000366978	0.000774808	0	0.00302792	0.00175677	0.000388514	0	0	0	0
k__Bacteria;p__Firmicutes;c__Clostridia;o__Clostridiales;f__uncultured;g__uncultured_bacterium	0	0	0	0	0	0	0	0	0	0	0	0	0	0	0	0	0	0	0	0	0	0.000184554	0.000155921
k__Bacteria;p__Firmicutes;c__Clostridia;o__Clostridiales;f__Peptococcaceae;g__uncultured_bacterium	0	0	0	0	0	0	0	0	0	0	0	0	0.00202374	0.00170584	0.00264009	0.00103852	0	0	0.000118243	0.000244411	0	0	0
k__Bacteria;p__Proteobacteria;c__Deltaproteobacteria;o__Desulfuromonadales;f__Desulfuromonadaceae;g__Desulfuromonas	0.000260464	0.000121651	0	0	0	0	0	0	0.000666043	0.000129772	0	0	0	0	0	0	0	0	0	0.000152757	0	0.000138416	0.00313791
k__Bacteria;p__Proteobacteria;c__;o__;f__;g__	0	0	0	0	0	0	0	0	0	0.00109009	0.000832931	0.000912618	0.0011048	0.00123402	0.000765243	0.000882741	0	0.000184923	0	0	0	0	0.000604194
k__Bacteria;p__Firmicutes;c__Clostridia;o__Clostridiales;f__Clostridiaceae_1;g__Oxobacter	0.00158282	0.00166568	0.00156984	0	0	0	0	0	0	0	0	0	0	0	0	0	0	0	0	0	0	0.000307591	0
k__Bacteria;p__Firmicutes;c__Clostridia;o__Clostridiales;f__Christensenellaceae;g__uncultured	0	0	0	0	0	0	0	0	0	0	0	0	0	0	0	0	0	0	0	0	0.00129825	0	0.000136431
k__Bacteria;p__Aegiribacteria;c__uncultured_bacterium;o__<empty>;f__<empty>;g__	0	0	0	0	0	0	0	0	0	0	0	0	0	0	0	0	0	0	0	0	0	0	0
k__Bacteria;p__Lentisphaerae;c__Oligosphaeria;o__Oligosphaerales;f__Oligosphaeraceae;g__	0	0	0	0	0	0	0	0	0	0	0	0	0	0	0	0	0	0	0	0	0.00558759	0.00169175	0
k__Bacteria;p__Firmicutes;c__Clostridia;o__Clostridiales;f__Lachnospiraceae;g__Lachnoclostridium_5	0	0	0	0	0	0	0	0	0	0	0	0	0	0	0	0	0.00174179	0.00197251	0.000692568	0.000924179	0	0	0
k__Bacteria;p__Acetothermia;c__Acetothermiia;o__;f__;g__	0	0.00016844	0	0.000311892	0	0.000140252	0.000227276	0.0002565	0.000219653	0	0	0	0.000201341	0.000193571	0	0.000145393	0.000279274	0.000215743	0.000202703	0.000374254	0	0	0
k__Bacteria;p__Bacteroidetes;c__Bacteroidia;o__Flavobacteriales;f__Cryomorphaceae;g__	0	0	0	0	0	0.000280505	0.00315661	0.0015795	0.0012258	0	0	0	0	0	0	0	0	0.000616409	0	0	0	0	0
k__Bacteria;p__Bacteroidetes;c__Bacteroidia;o__Bacteroidales;f__Bacteroidetes_BD2-2;g__uncultured_organism	0.00166296	0.00103871	0.0005366	0	0	0	0	0	0	0	0	0	0	0	0	0	0	0	0	0	0	0	0
k__Bacteria;p__Acetothermia;c__Acetothermiia;o__uncultured_bacterium;f__<empty>;g__<empty>	0	0	0	0.000415856	0.000218426	0	0	0.000432	0.000347193	0	0	0	0	0	0.000196093	0	0	0	0.000692568	0.000733233	0	0.000261452	0.000214392
k__Bacteria;p__Firmicutes;c__Clostridia;o__Clostridiales;f__livecontrolB21;g__	0	0	0	0	0.000794276	0.00214386	0	0	0	0	0	0	0	0	0	0	0	0	0	0	0	0	0
k__Bacteria;p__Spirochaetes;c__Spirochaetia;o__Spirochaetales;f__Spirochaetaceae;g__Candidatus_Marispirochaeta	0	0	0	0	0	0	0	0	0	0	0	0	0	0	0	0	0	0	0	0	0	0	0
k__Bacteria;p__Planctomycetes;c__Planctomycetacia;o__Pirellulales;f__Pirellulaceae;g__uncultured	0	0	0	0	0.000119141	0	0	0.0003105	0.000162968	0	0.000116903	0.000135421	0.000573048	0.000528288	0.000564366	0.000197319	0.000404213	0.000184923	0.000844595	0.000702682	0	0	0
k__Bacteria;p__Firmicutes;c__;o__;f__;g__	0	0	0	0	0	0.000260469	0	0	0	0	0	0	0	0	0	0	0.000191082	0.000400666	0.00136824	0.00112276	0	0	0
k__Bacteria;p__Cloacimonetes;c__Cloacimonadia;o__Cloacimonadales;f__LK-44f;g__uncultured_bacterium	0	0	0	0	0	0	0	0	0	0	0	0	0	0	0	0	0	0	0	0	0	0	0
k__Bacteria;p__Firmicutes;c__Clostridia;o__Clostridiales;f__Peptococcaceae;g__uncultured	0	0	0	0	0	0	0	0	0	0	0	0	0	0	0	0	0	0	0	0	0	0	0.000565214
k__Bacteria;p__Synergistetes;c__Synergistia;o__Synergistales;f__Synergistaceae;g__	0	0	0	0	0	0	0	0	0	0	0	0	0	0	0	0	0	0	0	0	0.000140008	0.000207624	0
k__Bacteria;p__Chloroflexi;c__Anaerolineae;o__SBR1031;f__uncultured_organism;g__<empty>	0	0	0	0.000401004	0.000330948	0	0	0	0.000198396	0	0	0	0	0.000157276	0	0	0.000227829	0	0.00152027	0.000824887	0.000152736	0.000576732	0.000194901
k__Bacteria;p__Bacteroidetes;c__Bacteroidia;o__Bacteroidales;f__Prolixibacteraceae;g__uncultured	0.00142253	0.000701833	0.000548017	0	0	0	0	0	0	0	0	0	0	0	0	0	0	0	0	0	0	0	0
k__Bacteria;p__Chloroflexi;c__Dehalococcoidia;o__GIF9;f__uncultured_bacterium;g__<empty>	0	0	0	0	0.000158855	0	0.000227276	0.0003105	0.000141711	0.000155727	0	0.000147196	0.000227154	0.000225833	0.0002774	0	0.000455658	0	0.000574324	0.000435357	0	0.000184554	0
k__Bacteria;p__Firmicutes;c__Clostridia;o__Clostridiales;f__Clostridiaceae;g__Anaeromicrobium	0	0	0	0	0	0	0	0	0	0	0	0	0	0	0	0	0	0	0	0	0.00019092	0.00596726	0
k__Bacteria;p__Firmicutes;c__Clostridia;o__Clostridiales;f__Family_XI;g__Sedimentibacter	0	0	0	0	0	0	0	0	0	0	0	0	0	0	0	0	0.00043361	0.000246564	0.000557432	0.000473546	0.000547304	0.00182247	0.000175411
k__Bacteria;p__Bacteroidetes;c__Bacteroidia;o__Bacteroidales;f__Rs-E47_termite_group;g__	0.0018533	0.00111358	0.000582268	0	0	0	0	0	0	0	0	0	0	0	0	0	0	0	0	0	0	0	0
k__Bacteria;p__Firmicutes;c__Clostridia;o__Clostridiales;f__Lachnospiraceae;g__Vallitalea	0	0	0.000285426	0	0	0	0	0	0	0	0	0	0	0	0	0	0	0	0	0	0.00403477	0.00161485	0
k__Bacteria;p__Proteobacteria;c__Deltaproteobacteria;o__Desulfovibrionales;f__Desulfomicrobiaceae;g__	0	0	0	0.00270306	0.00161503	0	0	0	0	0	0	0	0	0	0	0	0	0	0	0	0	0	0
k__Bacteria;p__Spirochaetes;c__Spirochaetia;o__Spirochaetales;f__Spirochaetaceae;g__Sphaerochaeta	0.00014025	0.000131009	0.00011417	0	0	0	0	0	0	0	0	0	0	0	0	0	0	0	0	0	0.000165464	0	0.000253372
k__Bacteria;p__Bacteroidetes;c__Bacteroidia;o__Bacteroidales;f__Bacteroidetes_vadinHA17;g__	0	0	0	0	0	0	0.00017677	0.001971	0.00282714	0	0	0	0	0	0	0	0	0	0	0	0	0	0
k__Bacteria;p__Bacteroidetes;c__Bacteroidia;o__Flavobacteriales;f__Flavobacteriaceae;g__Lutibacter	0	0	0	0	0	0	0	0.0004725	0.00102741	0	0	0	0	0	0	0	0	0	0	0	0	0	0
k__Bacteria;p__Planctomycetes;c__Phycisphaerae;o__Phycisphaerales;f__AKAU3564_sediment_group;g__uncultured_organism	0	0	0	0	0	0	0	0	0	0	0	0	0	0	0	0	0	0	0	0	0	0	0
k__Bacteria;p__Tenericutes;c__Mollicutes;o__Izimaplasmatales;f__Izimaplasmataceae;g__bacterium_enrichment_culture_clone_R4-81B	0	0	0	0	0	0	0	0	0	0	0	0	0	0	0	0	0	0	0	0	0	0	0
k__Bacteria;p__Proteobacteria;c__Gammaproteobacteria;o__Vibrionales;f__Vibrionaceae;g__	0	0	0	0	0	0	0	0	0	0.000181681	0	0	0	0	0	0.000488104	0	0	0.000557432	0.000473546	0.000496392	0	0
k__Bacteria;p__Kiritimatiellaeota;c__Kiritimatiellae;o__WCHB1-41;f__uncultured_bacterium;g__	0	0	0	0	0	0	0.0010985	0.000567001	0	0	0	0	0	0	0	0	0	0	0	0	0.000305472	0	0.00134482
k__Bacteria;p__Bacteroidetes;c__Bacteroidia;o__Bacteroidetes_VC2.1_Bac22;f__;g__	0	0	0	0	0	0	0	0	0	0	0	0	0	0	0	0	0	0	0	0	0	0	0
k__Bacteria;p__Actinobacteria;c__Actinobacteria;o__Micrococcales;f__Micrococcaceae;g__	0	0	0	0	0	0	0	0	0	0	0	0	0	0.000149211	0.000186528	0	0	0	0.000506757	0.00017567	0	0	0
k__Bacteria;p__Planctomycetes;c__Phycisphaerae;o__MSBL9;f__SG8-4;g__uncultured_bacterium	0	0	0	0.00044556	0	0	0	0	0	0	0	0	0	0	0	0	0	0	0.000827703	0.000580476	0	0	0
k__Bacteria;p__Spirochaetes;c__V2072-189E03;o__uncultured_organism;f__<empty>;g__<empty>	0	0	0	0	0	0	0	0	0	0	0	0	0	0	0	0	0	0	0	0	0	0	0
k__Bacteria;p__Firmicutes;c__Clostridia;o__Clostridiales;f__Family_XII;g__	0.000480856	0.000327522	0	0	0	0	0	0	0	0.000700771	0	0.000488692	0	0	0.000258269	0.00138123	0	0	0	0	0	0.000499835	0
k__Bacteria;p__Spirochaetes;c__V2072-189E03;o__uncultured_organism;f__<empty>;g__	0	0	0	0	0	0	0	0	0	0	0	0	0	0	0	0	0	0	0	0	0	0	0
k__Bacteria;p__Firmicutes;c__Bacilli;o__Bacillales;f__Bacillaceae;g__Aeribacillus	0	0	0	0	0	0	0	0	0	0	0	0	0	0.000129047	0	0	0	0	0.000777027	0.00017567	0	0	0
k__Bacteria;p__Proteobacteria;c__Deltaproteobacteria;o__PB19;f__uncultured_organism;g__	0	0	0	0	0	0	0	0	0	0	0	0	0	0	0	0	0	0	0	0	0.000152736	0	0
k__Bacteria;p__Chloroflexi;c__Anaerolineae;o__SBR1031;f__uncultured_bacterium;g__<empty>	0	0	0	0	0	0	0	0	0	0	0	0	0	0	0	0	0	0	0.000608108	0.000381892	0	0	0
k__Bacteria;p__Bacteroidetes;c__Bacteroidia;o__Chitinophagales;f__Chitinophagaceae;g__	0	0	0	0	0	0	0	0	0	0	0	0	0	0	0	0	0	0	0	0	0	0	0
k__Bacteria;p__Proteobacteria;c__Gammaproteobacteria;o__Methylococcales;f__Methylomonaceae;g__	0	0	0	0	0	0	0	0	0	0.000467181	0	0.000565235	0.000500772	0.000451666	0	0.000851585	0	0	0	0	0	0	0
k__Bacteria;p__Firmicutes;c__Clostridia;o__Clostridiales;f__Lachnospiraceae;g__Herbinix	0	0	0	0	0	0	0	0	0	0	0	0	0	0	0	0	0	0	0.000692568	0.000855439	0	0	0
k__Bacteria;p__Firmicutes;c__Clostridia;o__Clostridiales;f__Clostridiaceae_1;g__	0.00154275	0.000608255	0	0	0	0	0	0	0	0	0	0	0.000103252	0	0	0	0	0	0	0	0	0	0
k__Bacteria;p__Bacteroidetes;c__Bacteroidia;o__Bacteroidales;f__Bacteroidetes_BD2-2;g__uncultured_Cytophagales_bacterium	0	0.00112293	0.0012045	0	0	0	0	0	0	0	0	0	0	0	0	0	0	0	0	0	0	0	0
k__Bacteria;p__Bacteroidetes;c__Bacteroidia;o__Bacteroidales;f__Paludibacteraceae;g__Paludibacter	0	0	0	0	0	0	0	0	0	0	0	0	0	0	0	0	0	0	0.00121622	0.0011915	0	0	0
k__Bacteria;p__Fibrobacteres;c__Fibrobacteria;o__Fibrobacterales;f__;g__	0.000520927	0.000262018	0	0	0	0	0	0	0	0	0	0	0	0	0	0	0	0	0	0	0	0	0
k__Bacteria;p__Synergistetes;c__Synergistia;o__Synergistales;f__Synergistaceae;g__EBM-39	0	0	0	0	0	0	0	0	0	0	0	0	0	0	0	0	0	0	0	0	0.00025456	0	0
k__Bacteria;p__Firmicutes;c__Clostridia;o__Clostridiales;f__Clostridiales_vadinBB60_group;g__uncultured_bacterium	0	0	0	0	0	0	0	0	0	0	0	0	0	0	0	0	0	0	0	0	0.000140008	0	0.000292352
k__Bacteria;p__Firmicutes;c__Clostridia;o__Clostridiales;f__MAT-CR-H4-C10;g__	0	0	0	0	0	0	0	0	0	0	0	0	0	0	0	0	0	0	0	0	0	0.00307591	0
k__Bacteria;p__Planctomycetes;c__Phycisphaerae;o__mle1-8;f__uncultured_bacterium;g__	0	0	0	0	0	0	0	0	0	0	0	0	0	0	0	0	0	0	0	0	0	0	0
k__Bacteria;p__Marinimicrobia_(SAR406_clade);c__;o__;f__;g__	0	0	0	0	0	0	0	0	0	0	0	0	0	0	0	0	0	0	0	0	0	0.000492145	0.000155921
k__Bacteria;p__Bacteroidetes;c__Bacteroidia;o__Sphingobacteriales;f__;g__	0	0	0	0	0	0	0	0	0	0	0	0	0	0	0	0	0	0	0	0	0	0	0
k__Archaea;p__Crenarchaeota;c__Bathyarchaeia;o__uncultured_archaeon;f__<empty>;g__<empty>	0.000160285	0	0	0.000163372	0.000145617	0	0	0	0.000205481	0	0	0	0	0.000104851	0	0	0	0.000123282	0.000439189	0.000290238	0	0.000269142	0.000194901
k__Bacteria;p__Planctomycetes;c__Phycisphaerae;o__MSBL9;f__L21-RPul-D3;g__uncultured_organism	0	0	0	0	0	0	0	0	0	0	0	0	0	0	0	0	0	0	0	0	0.000280016	0.000192244	0
k__Bacteria;p__Bacteroidetes;c__Bacteroidia;o__Flavobacteriales;f__Flavobacteriales_Incertae_Sedis;g__	0	0	0	0	0	0	0.000972234	0.000540001	0.000432219	0	0	0	0	0	0	0	0	0	0	0	0	0.000938151	0
k__Bacteria;p__Firmicutes;c__Clostridia;o__Clostridiales;f__JTB215;g__	0	0	0	0	0	0	0.00117426	0.0003375	0	0.000129772	0.000175354	0	0	0	0	0	0	0	0	0	0	0	0
k__Bacteria;p__Firmicutes;c__Bacilli;o__Bacillales;f__Bacillaceae;g__Oceanobacillus	0	0	0	0	0	0	0	0	0	0	0	0	0	0	0	0	0	0	0.000135135	0	0	0	0
k__Bacteria;p__Planctomycetes;c__Phycisphaerae;o__MSBL9;f__SG8-4;g__	0	0	0	0.000118816	0.000165474	0	0	0	0.000177139	0	0	0	0	0	0.000105221	0	9.55412e-05	0.000123282	0.000405405	0.000221497	0	0.000161485	0
k__Bacteria;p__Tenericutes;c__Mollicutes;o__Izimaplasmatales;f__Izimaplasmataceae;g__	0	0	0	0	0	0	0	0	0	0	0	0	0	0	0	0	0	0	0	0	0	0	0
k__Bacteria;p__Cloacimonetes;c__Cloacimonadia;o__MSBL2;f__metagenome;g__<empty>	0	0	0	0	0	0	0.000138891	0.0002025	0	0	0	0	0.00011874	0.000241964	0.0002774	0	0.000338069	0.000277384	0.000287162	0.000267325	0	0	0
k__Bacteria;p__Bacteroidetes;c__Bacteroidia;o__Bacteroidales;f__Prolixibacteraceae;g__Tangfeifania	0	0	0	0	0	0	0	0	0	0	0	0	0	0	0	0	0	0	0	0	0	0	0
k__Bacteria;p__Firmicutes;c__Clostridia;o__Clostridiales;f__Peptococcaceae;g__Dehalobacter	0	0	0	0	0	0	0	0	0	0	0	0	0	0	0	0	0	0	0	0	0	0.00103812	0
k__Bacteria;p__Proteobacteria;c__Gammaproteobacteria;o__Enterobacteriales;f__Enterobacteriaceae;g__	0	0	0	0	0	0	0	0	0	0	0	0	0.000227154	0.000201636	0	0	0	0	0.000152027	0	0	0	0.000175411
k__Bacteria;p__Proteobacteria;c__Deltaproteobacteria;o__Desulfobacterales;f__Desulfobacteraceae;g__Desulfobacula_sp._TS	0	0	0	0	0	0	0	0	0	0	0	0	0	0	0	0	0	0	0	0	0	0	0
k__Bacteria;p__Lentisphaerae;c__Oligosphaeria;o__P.palmC41;f__uncultured_bacterium;g__<empty>	0	0	0	0	0	0	0	0	0	0	0	0	0	0	0	0	0.00075698	0.000462307	0.000118243	0	0	0	0
k__Bacteria;p__FCPU426;c__uncultured_bacterium;o__<empty>;f__<empty>;g__<empty>	0	0	0	0	0	0	0	0	0	0	0	0	0	0	0	0	0	0	0	0	0	0	0
k__Bacteria;p__Bacteroidetes;c__Bacteroidia;o__Bacteroidales;f__Prolixibacteraceae;g__uncultured_bacterium	0	0	0	0	0	0	0	0	0	0	0	0	0	0	0	0	0	0	0	0	0.00129825	0	0
k__Archaea;p__Euryarchaeota;c__Methanomicrobia;o__Methanosarcinales;f__Methanosarcinaceae;g__	0	0	0	0	0	0	0	0	0	0	0	0	0	0	0	0	0.00021313	0.000554768	0.00027027	0.000381892	0	0	0
k__Bacteria;p__Bacteroidetes;c__Bacteroidia;o__Bacteroidales;f__SB-5;g__uncultured_bacterium	0	0.000524035	0.00102182	0	0	0	0	0	0	0	0	0	0	0	0	0	0	0	0	0	0	0	0
k__Bacteria;p__Proteobacteria;c__Deltaproteobacteria;o__SAR324_clade(Marine_group_B);f__uncultured_bacterium;g__<empty>	0	0	0	0	0	0	0	0	0	0	0	0	0.000428495	0.000467797	0	0	0	0	0	0	0.000267288	0	0
k__Bacteria;p__Firmicutes;c__Clostridia;o__Clostridiales;f__Clostridiales_vadinBB60_group;g__	0	0	0	0	0	0	0	0	0	0	0	0	0	0	0	0	0	0	0	0	0	0	0
k__Bacteria;p__Firmicutes;c__Clostridia;o__Clostridiales;f__Clostridiaceae_2;g__Anoxynatronum	0	0	0	0	0	0	0	0	0	0	0	0	0.000345894	0.000407306	0	0	0	0	0	0	0	0	0
k__Bacteria;p__Firmicutes;c__Clostridia;o__Clostridiales;f__Family_XIII;g__uncultured	0	0	0	0	0	0	0	0	0	0	0	0	0	0	0.000181745	0	0	0	0	0	0.000165464	0.00116115	0
k__Bacteria;p__Firmicutes;c__Bacilli;o__Bacillales;f__Bacillaceae;g__Bacillus	0	0	0	0	0	0	0	0	0	0	0	0	0	0	0	0	0	0	0.000236486	0	0	0	0
k__Bacteria;p__Chloroflexi;c__Anaerolineae;o__Anaerolineales;f__Anaerolineaceae;g__Ornatilinea	0	0	0	0	0	0	0	0	0	0	0	0	0	0	0	0	0	0	0	0	0	0	0
k__Bacteria;p__Bacteroidetes;c__Bacteroidia;o__Bacteroidales;f__Bacteroidaceae;g__Bacteroides	0	0	0	0	0	0	0	0	0	0	0	0	0	0	0	0	0	0	0	0	0	0	0
k__Bacteria;p__Firmicutes;c__Clostridia;o__Clostridiales;f__Syntrophomonadaceae;g__Syntrophomonas	0	0	0	0	0	0	0	0	0	0	0	0	0	0	0	0	0	0	0	0	0	0	0
k__Bacteria;p__Bacteroidetes;c__Bacteroidia;o__Bacteroidales;f__Prolixibacteraceae;g__uncultured_Cytophagales_bacterium	0	0	0	0	0	0	0	0	0	0	0	0	0	0	0	0	0	0	0	0	0	0	0
k__Bacteria;p__Bacteroidetes;c__Bacteroidia;o__Flavobacteriales;f__Weeksellaceae;g__Cloacibacterium	0	0	0	0	0	0	0	0	0	0	0	0	0	0	0	0	0	0	0	0	0	0	0
k__Bacteria;p__Bacteroidetes;c__Bacteroidia;o__Bacteroidales;f__Marinilabiliaceae;g__[Cytophaga]_xylanolytica_group	0	0	0	0	0	0	0	0	0	0	0	0	0	0	0	0	0.000573247	0.000493127	0.000202703	0.000343703	0	0	0
k__Bacteria;p__Firmicutes;c__Clostridia;o__Clostridiales;f__Ruminococcaceae;g__Ruminococcaceae_UCG-010	0.000170303	0.000131009	0.000142713	0	0	0	0	0	0	0	0	0	0	0	0	0	0.000227829	0	0.000168919	0.000160395	0	0	0
k__Bacteria;p__Chloroflexi;c__Dehalococcoidia;o__MSBL5;f__uncultured_bacterium;g__<empty>	0	0	0	0	0	0	0	0	0	0	0	0	0	0	0	0	0	0	0.00114865	0.000221497	0	0	0
k__Bacteria;p__Aegiribacteria;c__;o__;f__;g__	0	0	0	0	0	0	0	0	0	0	0	0	0	0	0	0	0	0	0	0	0	0	0
k__Bacteria;p__Proteobacteria;c__Gammaproteobacteria;o__Alteromonadales;f__Idiomarinaceae;g__Idiomarina	0	0	0	0	0	0	0	0	0	0	0	0	0	0	0	0	0	0	0	0	0	0	0
k__Bacteria;p__Cyanobacteria;c__Oxyphotobacteria;o__Synechococcales;f__Cyanobiaceae;g__Synechococcus_CC9902	0	0	0	0	0	0	0	0	0	0	0	0	0	0	0.000186528	0	0	0	0	0.000297876	0	0	0
k__Bacteria;p__Bacteroidetes;c__Bacteroidia;o__Chitinophagales;f__uncultured;g__	0	0	0	0	0	0	0	0.0001485	0	0	0	0	0	0	0	0	0	0	0	0	0	0.000945841	0
k__Bacteria;p__Firmicutes;c__Clostridia;o__Clostridiales;f__Clostridiaceae_2;g__	0	0	0	0	0	0.000190343	0	0	0	0	0	0	0.000221992	0.000189538	0	0	0	0	0	0	0	0	0
k__Bacteria;p__Bacteroidetes;c__Bacteroidia;o__Bacteroidales;f__Rs-E47_termite_group;g__GWE2-42-42	0	0.000542751	0.000759232	0	0	0	0	0	0	0	0	0	0	0	0	0	0	0	0	0	0	0	0
k__Bacteria;p__Firmicutes;c__Clostridia;o__Clostridiales;f__Lachnospiraceae;g__Lachnospiraceae_UCG-007	0	0	0	0	0	0	0	0	0	0	0	0	0	0	0	0	0.000521802	0.000277384	0	0.000206222	0	0	0
k__Bacteria;p__Bacteroidetes;c__;o__;f__;g__	0	0	0	0	0	0	0	0	0	0	0	0	0	0	0	0	0.000169034	0.000523947	0.000287162	0.0002826	0	0	0
k__Bacteria;p__Proteobacteria;c__Gammaproteobacteria;o__Betaproteobacteriales;f__Rhodocyclaceae;g__	0	0	0	0	0	0	0	0	0	0	0	0	0	0	0	0	0	0	0	0	0	0	0
k__Bacteria;p__Proteobacteria;c__Gammaproteobacteria;o__Betaproteobacteriales;f__Burkholderiaceae;g__Limnohabitans	0	0	0	0	0	0	0	0	0	0	0	0	0.000392357	0.000286324	0.000564366	0	0	0	0	0	0	0	0
k__Bacteria;p__Proteobacteria;c__Gammaproteobacteria;o__Alteromonadales;f__Idiomarinaceae;g__Aliidiomarina	0	0	0	0	0	0	0	0	0	0	0	0	0	0	0	0	0	0	0	0	0	0	0
k__Bacteria;p__Planctomycetes;c__Phycisphaerae;o__MSBL9;f__4572-13;g__	0	0	0	0	0	0	0	0	0	0	0	0	0	0	0	0	0	0	0	0	0.000789135	0	0
k__Bacteria;p__Bacteroidetes;c__Bacteroidia;o__Sphingobacteriales;f__ADurb.Bin408;g__	0	0	0	0	0	0	0	0	0	0	0	0	0	0	0	0	0	0	0	0	0	0	0
k__Bacteria;p__Proteobacteria;c__Deltaproteobacteria;o__Desulfuromonadales;f__;g__	0	0	0	0	0	0	0	0	0	0	0	0	0	0	0	0	0	0	0	0	0	0	0
k__Bacteria;p__Proteobacteria;c__Gammaproteobacteria;o__Alteromonadales;f__Alteromonadaceae;g__	0	0	0	0	0	0	0	0	0	0	0	0	0	0	0	0	0	0	0	0	0.00108188	0	0
k__Bacteria;p__Proteobacteria;c__Alphaproteobacteria;o__Rhizobiales;f__Xanthobacteraceae;g__Afipia	0	0	0	0	0	0	0	0	0	0	0	0	0.000149715	0.000205669	0.000229573	0	0	0	0.000219595	0.000259687	0	0	0
k__Bacteria;p__Firmicutes;c__Clostridia;o__Clostridiales;f__Lachnospiraceae;g__Lachnospiraceae_NC2004_group	0	0	0	0	0	0	0	0	0	0	0	0	0	0	0	0	0	0	0.000320946	0	0	0	0
k__Bacteria;p__Bacteroidetes;c__Bacteroidia;o__Bacteroidales;f__Prolixibacteraceae;g__Roseimarinus	0.000240428	0	0	0	0	0	0	0	0	0	0	0	0	0	0	0	0	0	0	0	0	0	0
k__Bacteria;p__Bacteroidetes;c__Bacteroidia;o__Sphingobacteriales;f__S15A-MN91;g__	0	0	0	0	0	0	0	0	0	0	0	0	0	0	0	0	0	0	0	0	0	0	0
k__Bacteria;p__Fibrobacteres;c__Fibrobacteria;o__Fibrobacterales;f__SBYZ-1017;g__	0	0	0	0	0	0	0	0	0	0	0	0	0	0	0	0	0	0	0	0	0	0	0
k__Bacteria;p__Aerophobetes;c__uncultured_bacterium;o__<empty>;f__<empty>;g__<empty>	0	0	0	0	0	0	0	0	0	0	0	0	0.00013939	0	0	0	0.000352767	0	0.00035473	0.000145119	0	0	0
k__Bacteria;p__Firmicutes;c__Clostridia;o__Clostridiales;f__MAT-CR-H4-C10;g__uncultured_bacterium	0	0	0	0	0	0	0	0	0.000106283	0	0	0	0	0	0	0	0	0	0	0	0.000585488	0	0
k__Bacteria;p__Omnitrophicaeota;c__uncultured_bacterium;o__<empty>;f__<empty>;g__	0	0	0	0	0	0	0	0.0001485	0	0	0	0	0	0	0	0	0.000154336	0	0.000253378	0.000160395	0	0	0
k__Bacteria;p__Epsilonbacteraeota;c__Campylobacteria;o__Campylobacterales;f__Sulfurovaceae;g__Sulfurovum	0	0	0	0	0	0	0	0	0	0	0	0	0	0	0	0	0	0	0	0	0	0	0.000896546
k__Bacteria;p__Actinobacteria;c__WCHB1-81;o__uncultured_bacterium;f__<empty>;g__<empty>	0	0	0	0	0	0	0	0	0	0	0	0	0	0	0	0	0.000176384	0	0.000185811	0	0	0	0
k__Bacteria;p__Firmicutes;c__Bacilli;o__Bacillales;f__Bacillaceae;g__Caldalkalibacillus	0	0	0	0	0	0	0	0	0	0	0	0	0	0	0	0	0	0	0.000152027	0	0	0	0
k__Bacteria;p__Firmicutes;c__Clostridia;o__Clostridiales;f__Clostridiaceae_3;g__	0	0	0	0	0	0	0	0	0	0	0	0	0	0	0	0	0	0	0	0	0	0.000830495	0
k__Bacteria;p__LCP-89;c__uncultured_bacterium;o__<empty>;f__<empty>;g__<empty>	0	0	0	0	0	0	0	0	0	0	0	0	0	0	0	0	0.000183733	0.000154102	0	0.000183308	0	0	0
k__Bacteria;p__Aegiribacteria;c__uncultured_sediment_bacterium;o__<empty>;f__<empty>;g__	0	0	0	0	0	0	0	0	0	0	0	0	0	0	0	0	0	0	0	0	0	0	0
k__Bacteria;p__Planctomycetes;c__Phycisphaerae;o__Phycisphaerales;f__AKAU3564_sediment_group;g__uncultured_bacterium	0	0	0	0	0	0	0	0	0	0	0	0	0	0	0	0	0	0	0.000793919	0	0	0	0
k__Bacteria;p__Chloroflexi;c__Dehalococcoidia;o__FS117-23B-02;f__uncultured_bacterium;g__	0	0	0	0	0	0	0	0	0	0	0	0	0	0	0	0	0	0	0.00035473	0.000252049	0	0	0
k__Bacteria;p__Firmicutes;c__Clostridia;o__Clostridiales;f__Lachnospiraceae;g__Epulopiscium	0	0	0	0	0	0	0	0	0	0	0	0	0	0	0	0	0	0	0.000219595	0	0	0	0
k__Bacteria;p__Firmicutes;c__Clostridia;o__Clostridiales;f__Family_XIII;g__	0	0	0	0	0	0	0	0	0	0	0	0	0	0	0	0	0	0	0	0	0	0.000538283	0
k__Bacteria;p__Lentisphaerae;c__Oligosphaeria;o__Oligosphaerales;f__;g__	0	0	0	0	0	0	0	0	0	0	0	0	0	0	0	0	0	0	0	0	0.000750951	0	0
k__Bacteria;p__Bacteroidetes;c__Bacteroidia;o__Flavobacteriales;f__Crocinitomicaceae;g__	0	0	0	0	0	0	0	0	0	0	0	0	0	0	0	0	0	0	0	0	0	0	0
k__Bacteria;p__Firmicutes;c__Clostridia;o__Clostridiales;f__Peptococcaceae;g__Candidatus_Dichloromethanomonas	0	0	0	0	0	0	0	0	0	0	0	0	0	0	0	0	0	0	0	0	0	0	0
k__Bacteria;p__Chloroflexi;c__Anaerolineae;o__SBR1031;f__uncultured_Chloroflexi_bacterium;g__<empty>	0	0	0	0	0	0	0	0	0.00012754	0	0	0	0	0	0	0	0	0	0	0	0	0.000146106	0.000116941
k__Bacteria;p__Firmicutes;c__Clostridia;o__Clostridiales;f__Caldicoprobacteraceae;g__Caldicoprobacter	0	0	0	0	0	0	0	0	0	0	0	0	0	0	0	0	0	0	0	0	0	0	0
k__Bacteria;p__Firmicutes;c__Clostridia;o__Clostridiales;f__Clostridiales_Incertae_Sedis;g__	0	0	0	0	0	0	0	0	0	0	0	0	0.000485284	0.0002218	0	0	0	0	0	0	0	0	0
k__Bacteria;p__Planctomycetes;c__Phycisphaerae;o__CCM11a;f__uncultured_planctomycete;g__<empty>	0	0	0	0	0	0	0	0	0	0	0	0	0	0	0	0	0	0	0.00035473	0.00017567	0	0	0
k__Bacteria;p__Firmicutes;c__Clostridia;o__Clostridiales;f__Ruminococcaceae;g__Ruminococcus_1	0	0	0	0	0	0	0	0	0	0	0	0	0	0	0	0	0	0	0	0	0	0	0
k__Bacteria;p__Planctomycetes;c__Planctomycetacia;o__Pirellulales;f__Pirellulaceae;g__Pir4_lineage	0	0	0	0	0	0	0	0	0	0	0	0	0	0	0.000148266	0	0	0	0.00035473	0	0	0	0
k__Bacteria;p__Firmicutes;c__Clostridia;o__Clostridiales;f__Ruminococcaceae;g__Faecalibacterium	0	0	0	0	0	0	0	0	0	0	0	0	0	0	0	0	0	0	0	0	0	0	0
k__Bacteria;p__Chloroflexi;c__Dehalococcoidia;o__GIF9;f__AB-539-J10;g__SCGC-AB-539-J10	0	0	0	0	0	0	0	0	0	0	0	0	0	0	0	0	0.000191082	0	0.000101351	0	0	0	0
k__Bacteria;p__Bacteroidetes;c__Bacteroidia;o__Sphingobacteriales;f__ST-12K33;g__uncultured_organism	0	0	0	0	0	0	0	0	0	0	0	0	0	0	0	0	0	0	0	0	0	0	0
k__Bacteria;p__Bacteroidetes;c__Bacteroidia;o__Bacteroidales;f__Prolixibacteraceae;g__WCHB1-32	0	0	0	0	0	0.00015027	0.000277781	0	0.000155882	0	0	0	0	0	0	0	0	0	0	0	0	0	0
k__Bacteria;p__Planctomycetes;c__Phycisphaerae;o__MSBL9;f__;g__	0	0	0	0	0	0	0	0	0	0	0	0	0	0	0	0	0	0	0	0	0.00057276	0	0
k__Bacteria;p__Proteobacteria;c__Gammaproteobacteria;o__Methylococcales;f__Methylomonaceae;g__Crenothrix	0	0	0	0	0	0	0	0	0	0.000285499	0	0	0	0	0	0.000270015	0	0	0	0	0	0	0
k__Bacteria;p__Cyanobacteria;c__;o__;f__;g__	0	0	0	0	0	0	0	0	0	0	0	0	0	0	0	0	0	0	0	0	0	0	0
k__Bacteria;p__Firmicutes;c__Clostridia;o__Clostridiales;f__Lachnospiraceae;g__Anaerostipes	0	0	0	0	0	0	0	0	0	0	0	0	0	0	0	0	0	0.000123282	0	0	0	0	0
k__Bacteria;p__Proteobacteria;c__Gammaproteobacteria;o__Oceanospirillales;f__;g__	0	0	0	0	0	0	0	0	0	0.00023359	0.000263031	0	0	0	0	0	0	0	0	0	0	0	0
k__Bacteria;p__Proteobacteria;c__Gammaproteobacteria;o__Betaproteobacteriales;f__Burkholderiaceae;g__Undibacterium	0	0	0	0	0	0	0	0	0	0	0	0	0	0	0	0	0	0	0	0	0	0	0
k__Bacteria;p__Fusobacteria;c__Fusobacteriia;o__Fusobacteriales;f__Fusobacteriaceae;g__	0	0	0	0	0	0	0	0	0	0	0	0	0	0	0.000282183	0.000166163	0	0	0	0	0	0	0
k__Bacteria;p__Proteobacteria;c__Gammaproteobacteria;o__Vibrionales;f__Vibrionaceae;g__Vibrio	0	0	0	0	0	0	0	0	0	0	0	0	0	0	0	0	0	0	0	0	0.00044548	0	0
k__Bacteria;p__Proteobacteria;c__Deltaproteobacteria;o__Desulfobacterales;f__Desulfobacteraceae;g__Desulfoluna	0	0	0	0	0.000138998	0	0	0	0.000162968	0	0	0	0	0	0	0	0	0	0	0.000129843	0	0	0
k__Bacteria;p__Proteobacteria;c__Deltaproteobacteria;o__Desulfobacterales;f__Desulfobacteraceae;g__Desulfotignum	0	0	0	0	0	0	0	0	0	0	0	0	0	0	0	0	0	0	0	0	0.000229104	0.000192244	0
k__Bacteria;p__Firmicutes;c__Bacilli;o__Lactobacillales;f__Lactobacillaceae;g__	0	0	0	0	0	0	0	0	0	0	0	0	0	0	0	0	0	0	0	0	0	0	0
k__Bacteria;p__Chloroflexi;c__Dehalococcoidia;o__GIF3;f__uncultured_bacterium;g__<empty>	0	0	0	0	0	0	0	0	0	0	0	0	0	0	0	0	0	0	0.000168919	0	0	0	0
k__Archaea;p__Asgardaeota;c__Lokiarchaeia;o__uncultured_archaeon;f__<empty>;g__<empty>	0	0	0	0	0	0	0	0	0	0	0	0	0	0	0	0	0	0	0.000185811	0.00021386	0	0	0
k__Bacteria;p__Proteobacteria;c__Deltaproteobacteria;o__Myxococcales;f__MidBa8;g__	0	0	0	0	0	0	0	0	0	0	0	0	0	0	0	0	0	0	0	0	0	0	0
k__Bacteria;p__Proteobacteria;c__Gammaproteobacteria;o__Pseudomonadales;f__Moraxellaceae;g__Acinetobacter	0	0	0	0	0	0	0	0	0	0	0	0	0	0	0	0	0	0	0	0	0	0	0
k__Bacteria;p__Chloroflexi;c__Anaerolineae;o__Anaerolineales;f__Anaerolineaceae;g__Anaerolineaceae_UCG-001	0	0	0	0	0	0	0	0	0	0	0	0	0	0	0	0	0	0	0	0	0	0	0
k__Bacteria;p__Firmicutes;c__Clostridia;o__Clostridiales;f__Ruminococcaceae;g__Ruminococcaceae_NK4A214_group	0	0	0	0	0	0	0	0	0	0	0	0	0	0	0	0	0	0	0	0	0.000369112	0	0
k__Bacteria;p__Proteobacteria;c__Deltaproteobacteria;o__Desulfobacterales;f__Desulfobacteraceae;g__Desulfofaba	0	0	0	0	0	0	0	0	0	0	0	0	0	0	0	0	0	0	0	0	0	0.000361419	0
k__Bacteria;p__Planctomycetes;c__Phycisphaerae;o__DG-20;f__Planctomycetes_bacterium_DG_20;g__<empty>	0	0	0	0	0	0	0	0	0	0	0	0	0	0	0	0	0	0	0.000236486	0	0	0.000123036	0
k__Bacteria;p__Kiritimatiellaeota;c__Kiritimatiellae;o__WCHB1-41;f__uncultured_organism;g__	0	0	0	0	0	0	0.000151517	0.0002025	0	0	0	0	0	0	0	0	0	0	0	0	0	0	0
k__Bacteria;p__Firmicutes;c__Clostridia;o__Clostridiales;f__Lachnospiraceae;g__GCA-900066575	0	0	0	0	0	0	0	0	0	0	0	0	0	0	0	0	0	0	0	0	0	0	0
k__Bacteria;p__Omnitrophicaeota;c__uncultured_bacterium;o__<empty>;f__<empty>;g__<empty>	0	0	0	0	0	0	0	0	0	0	0	0	0	0	0	0	0.000249877	0	0	9.9292e-05	0	0	0
k__Bacteria;p__Firmicutes;c__Clostridia;o__Clostridiales;f__Ruminococcaceae;g__Ruminiclostridium_9	0	0	0	0	0	0	0	0	0	0	0	0	0	0	0	0	0	0	0	0	0	0.00033835	0
k__Bacteria;p__Firmicutes;c__Clostridia;o__Clostridiales;f__Ruminococcaceae;g__Acetanaerobacterium	0	0	0	0	0	0	0	0	0	0	0	0	0	0	0	0	0	0	0	0	0	0	0
k__Bacteria;p__Chloroflexi;c__Anaerolineae;o__ADurb.Bin180;f__uncultured_bacterium;g__	0	0	0	0	0	0	0	0	0	0	0	0	0	0	0	0	0	0	0	0	0	0	0
k__Bacteria;p__Lentisphaerae;c__Oligosphaeria;o__Oligosphaerales;f__Lenti-02;g__uncultured_Lentisphaerae_bacterium	0	0	0	0	0	0	0	0	0	0	0	0	0	0	0	0	0	0	0	0	0	0	0
k__Bacteria;p__Planctomycetes;c__Phycisphaerae;o__Phycisphaerales;f__AKAU3564_sediment_group;g__	0	0	0	0	0	0	0	0	0	0	0	0	0	0	0	0	0	0	0.000185811	0	0	0.000130726	0
k__Bacteria;p__Lentisphaerae;c__;o__;f__;g__	0	0	0	0	0	0	0	0	0	0	0	0	0	0	0	0	0	0	0	0	0.000305472	0	0
k__Bacteria;p__Bacteroidetes;c__Bacteroidia;o__Bacteroidales;f__Rikenellaceae;g__	0	0	0	0	0	0	0	0	0	0	0	0	0	0	0	0	0	0	0	0	0	0	0
k__Bacteria;p__Firmicutes;c__Clostridia;o__Clostridiales;f__Lachnospiraceae;g__Blautia	0	0	0	0	0	0	0	0	0	0	0	0	0	0	0	0	0	0	0	0	0	0	0
k__Archaea;p__Diapherotrites;c__Micrarchaeia;o__uncultured_euryarchaeote;f__<empty>;g__<empty>	0	0	0	0	0	0	0	0	0	0	0	0	0	0	0	0	0	0	0.000135135	0	0	0	0
k__Bacteria;p__Chloroflexi;c__Dehalococcoidia;o__FW22;f__uncultured_bacterium;g__<empty>	0	0	0	0	0	0	0	0	0	0	0	0	0	0	0	0	0	0	0.000135135	0	0	0	0
k__Bacteria;p__Firmicutes;c__Clostridia;o__Clostridiales;f__Lachnospiraceae;g__Natranaerovirga	0	0	0	0	0	0	0	0	0	0	0	0	0	0	0	0	0	0.000246564	0	0	0	0	0
k__Bacteria;p__Proteobacteria;c__Deltaproteobacteria;o__;f__;g__	0	0	0	0	0	0	0	0	0	0	0	0	0	0	0	0	0	0	0	0	0	0	0
k__Bacteria;p__Firmicutes;c__Clostridia;o__Clostridiales;f__Clostridiaceae_1;g__Proteiniclasticum	0	0	0	0	0	0	0	0	0	0	0	0	0	0	0	0	0	0	0	0	0	0	0
k__Bacteria;p__Proteobacteria;c__Gammaproteobacteria;o__Pseudomonadales;f__Pseudomonadaceae;g__Pseudomonas	0	0	0	0	0	0	0	0	0	0	0	0	0	0	0	0	0	0	0	0	0	0	0
k__Bacteria;p__Firmicutes;c__Clostridia;o__Clostridiales;f__Ruminococcaceae;g__Ruminococcaceae_UCG-012	0	0	0	0	0	0	0	0	0	0	0	0	0	0	0	0	0	0	0	0	0	0	0
k__Bacteria;p__Proteobacteria;c__Gammaproteobacteria;o__Oceanospirillales;f__Halomonadaceae;g__	0	0	0	0	0	0	0	0	0	0	0	0	0.000221992	0	0	0	0	0	0	0	0	0	0
k__Bacteria;p__Firmicutes;c__Clostridia;o__Clostridiales;f__Eubacteriaceae;g__Acetobacterium	0	0	0	0	0	0	0	0	0	0	0	0	0	0	0	0	0	0	0	0	0	0	0
k__Archaea;p__Euryarchaeota;c__Thermoplasmata;o__Marine_Benthic_Group_D_and_DHVEG-1;f__uncultured_archaeon;g__<empty>	0	0	0	0	0	0	0	0	0	0	0	0	0	0	0	0	0	0	0	0	0	0	0
k__Bacteria;p__Proteobacteria;c__Deltaproteobacteria;o__Desulfobacterales;f__Desulfobacteraceae;g__Desulfococcus	0	0	0	0	0	0	0	0	0	0	0	0	0	0	0	0	0	0	0	0	0	0	0
k__Bacteria;p__Proteobacteria;c__Deltaproteobacteria;o__Desulfovibrionales;f__;g__	0	0	0	0	0	0	0	0	0	0	0	0	0	0	0	0	0	0	0	0	0	0	0
k__Bacteria;p__Bacteroidetes;c__Bacteroidia;o__Bacteroidales;f__Rikenellaceae;g__Alistipes	0	0	0	0	0	0	0	0	0	0	0	0	0	0	0	0	0	0	0	0	0	0	0
k__Bacteria;p__Firmicutes;c__Clostridia;o__Clostridiales;f__Clostridiaceae;g__	0	0	0	0	0	0	0	0	0	0	0	0	0	0	0	0	0	0	0	0	0	0.000192244	0
k__Bacteria;p__Firmicutes;c__Clostridia;o__Clostridiales;f__Clostridiaceae_1;g__uncultured	0	0	0	0	0	0	0	0	0	0	0	0	0	0	0	0	0	0	0	0	0.00019092	0	0
k__Bacteria;p__Firmicutes;c__Bacilli;o__Bacillales;f__Bacillaceae;g__Anoxybacillus	0	0	0	0	0	0	0	0	0	0	0	0	0	0	0	0	0	0	0	0	0	0	0
k__Bacteria;p__Proteobacteria;c__Gammaproteobacteria;o__Pseudomonadales;f__Pseudomonadaceae;g__	0	0	0	0	0	0	0	0	0	0	0	0	0	0	0	0	0	0	0	0	0	0	0
k__Bacteria;p__Actinobacteria;c__Thermoleophilia;o__Gaiellales;f__uncultured;g__uncultured_bacterium	0	0	0	0	0	0	0	0	0	0	0	0	0	0	0	0	0	0	0.000185811	0	0	0	0
k__Bacteria;p__Aegiribacteria;c__Candidatus_Aegiribacteria_bacterium_MLS_C;o__<empty>;f__<empty>;g__	0	0	0	0	0	0	0	0	0	0	0	0	0	0	0	0	0	0	0	0	0	0	0
k__Bacteria;p__Spirochaetes;c__Leptospirae;o__Leptospirales;f__Leptospiraceae;g__Leptospira	0	0	0	0	0	0	0	0	0	0	0	0	0	0	0	0	0	0	0	0	0	0	0
k__Bacteria;p__Cyanobacteria;c__Oxyphotobacteria;o__Synechococcales;f__Cyanobiaceae;g__Cyanobium_PCC-6307	0	0	0	0	0	0	0	0	0	0	0	0	0	0	0	0	0	0	0	0	0	0	0
k__Bacteria;p__Firmicutes;c__Clostridia;o__Clostridiales;f__Ruminococcaceae;g__Ruminiclostridium	0	0	0	0	0	0	0	0	0	0	0	0	0	0	0	0	0	0	0	0	0	0	0
k__Bacteria;p__Firmicutes;c__Clostridia;o__Clostridiales;f__Clostridiaceae_1;g__Clostridium_sensu_stricto_1	0	0	0	0	0	0	0	0	0	0	0	0	0	0	0.000162614	0	0	0	0	0	0	0	0
k__Bacteria;p__Proteobacteria;c__Deltaproteobacteria;o__Desulfobacterales;f__Desulfobacteraceae;g__Desulfosarcina	0	0	0	0	0	0	0	0	0	0	0	0	0	0	0	0	0	0	0	0	0	0	0
k__Bacteria;p__Bacteroidetes;c__Bacteroidia;o__Bacteroidetes_VC2.1_Bac22;f__uncultured_Bacteroidetes_bacterium;g__<empty>	0	0	0	0	0	0	0	0	0	0	0	0	0	0	0	0	0	0	0	0	0	0	0
k__Bacteria;p__Cloacimonetes;c__Cloacimonadia;o__Cloacimonadales;f__MSBL8;g__uncultured_bacterium	0	0	0	0	0	0	0	0	0	0	0	0	0	0	0	0	0	0	0	0.000152757	0	0	0
k__Bacteria;p__Chloroflexi;c__Anaerolineae;o__Anaerolineales;f__Anaerolineaceae;g__	0	0	0	0	0	0	0	0	0	0	0	0	0	0	0	0	0	0	0	0	0	0	0
k__Bacteria;p__AncK6;c__uncultured_bacterium;o__<empty>;f__<empty>;g__<empty>	0	0	0	0	0	0	0	0	0	0	0	0	0	0	0	0	0	0	0	0	0	0	0
k__Bacteria;p__WS2;c__uncultured_bacterium;o__<empty>;f__<empty>;g__<empty>	0	0	0	0	0	0	0	0	0	0	0	0	0	0	0	0	0	0	0	0	0	0	0
k__Bacteria;p__Patescibacteria;c__Parcubacteria;o__GWA2-38-13b;f__uncultured_bacterium;g__<empty>	0	0	0	0	0	0	0	0	0	0	0	0	0	0	0	0	0	0	0	0	0	0	0
k__Bacteria;p__Firmicutes;c__Clostridia;o__Clostridiales;f__Christensenellaceae;g__Christensenellaceae_R-7_group	0	0	0	0	0	0	0	0	0	0	0	0	0	0	0	0	0	0	0	0	0	0	0
k__Bacteria;p__Firmicutes;c__Negativicutes;o__Selenomonadales;f__Veillonellaceae;g__Megasphaera	0	0	0	0	0	0	0	0	0	0	0	0	0	0	0	0	0	0	0	0	0	0	0
k__Bacteria;p__Firmicutes;c__Clostridia;o__Clostridiales;f__Peptococcaceae;g__	0	0	0	0	0	0	0	0	0	0	0	0	0	0	0	0	0	0	0	0	0.000140008	0	0
k__Bacteria;p__Dependentiae;c__Babeliae;o__Babeliales;f__uncultured_bacterium;g__	0	0	0	0	0	0	0	0	0	0	0	0	0	0	0	0	0	0	0	0.000137481	0	0	0
k__Archaea;p__Diapherotrites;c__Micrarchaeia;o__uncultured_euryarchaeote;f__<empty>;g__	0	0	0	0	0	0	0	0	0	0	0	0	0	0	0	0	0	0	0.000135135	0	0	0	0
k__Bacteria;p__WS1;c__uncultured_bacterium;o__<empty>;f__<empty>;g__	0	0	0	0	0	0	0	0	0	0	0	0	0	0	0	0	0	0	0.000135135	0	0	0	0
k__Bacteria;p__Bacteroidetes;c__Bacteroidia;o__Sphingobacteriales;f__env.OPS_17;g__	0	0	0	0	0	0	0	0	0	0	0	0	0	0	0	0	0	0	0	0	0	0	0
k__Bacteria;p__Calditrichaeota;c__Calditrichia;o__Calditrichales;f__Calditrichaceae;g__	0	0	0	0	0	0	0	0	0	0	0	0	0	0	0	0	0	0	0	0	0	0	0
k__Bacteria;p__Planctomycetes;c__Phycisphaerae;o__MSBL9;f__SG8-4;g__uncultured_organism	0	0	0	0	0	0	0	0	0	0	0	0	0	0	0	0	0	0	0	0	0	0	0
k__Archaea;p__Asgardaeota;c__Lokiarchaeia;o__;f__;g__	0.000130232	0	0	0	0	0	0	0	0	0	0	0	0	0	0	0	0	0	0	0	0	0	0
k__Bacteria;p__Fusobacteria;c__Fusobacteriia;o__Fusobacteriales;f__Fusobacteriaceae;g__Ilyobacter	0	0	0	0	0	0	0	0	0	0.000129772	0	0	0	0	0	0	0	0	0	0	0	0	0
k__Bacteria;p__Firmicutes;c__Bacilli;o__Lactobacillales;f__Enterococcaceae;g__Tetragenococcus	0	0	0	0	0	0	0	0	0	0	0	0	0	0	0	0	0	0	0	0	0	0	0
k__Bacteria;p__Proteobacteria;c__Gammaproteobacteria;o__Betaproteobacteriales;f__Burkholderiaceae;g__Burkholderia-Caballeronia-Paraburkholderia	0	0	0	0	0	0	0	0	0	0	0	0	0	0	0	0	0	0	0	0	0	0	0
k__Bacteria;p__Bacteroidetes;c__Ignavibacteria;o__OPB56;f__uncultured_bacterium;g__	0	0	0	0	0	0	0	0	0	0	0	0	0	0	0	0	0	0	0	0	0	0	0
k__Bacteria;p__Proteobacteria;c__Deltaproteobacteria;o__Sva0485;f__;g__	0	0	0	0	0	0	0	0.0001215	0	0	0	0	0	0	0	0	0	0	0	0	0	0	0
k__Bacteria;p__Proteobacteria;c__Deltaproteobacteria;o__Desulfobacterales;f__Desulfobacteraceae;g__Candidatus_Desulfamplus	0	0	0	0	0	0	0	0	0	0	0	0	0	0	0	0	0	0	0	0	0	0	0
k__Bacteria;p__Planctomycetes;c__Phycisphaerae;o__CCM11a;f__uncultured_bacterium;g__<empty>	0	0	0	0	0	0	0	0	0	0	0	0	0	0	0	0	0	0	0.000118243	0	0	0	0
k__Bacteria;p__Aerophobetes;c__;o__;f__;g__	0	0	0	0	0	0	0	0	0	0	0	0	0	0	0	0	0	0	0.000118243	0	0	0	0
k__Bacteria;p__Planctomycetes;c__Phycisphaerae;o__DG-20;f__uncultured_organism;g__<empty>	0	0	0	0	0	0	0	0	0	0	0	0	0	0	0	0	0	0	0.000118243	0	0	0	0
k__Bacteria;p__Cyanobacteria;c__Oxyphotobacteria;o__Chloroplast;f__;g__	0	0	0	0	0	0	0	0	0	0	0	0	0	0	0	0	0.000117589	0	0	0	0	0	0
k__Bacteria;p__Proteobacteria;c__Deltaproteobacteria;o__10bav-F6;f__uncultured_bacterium;g__<empty>	0	0	0	0	0	0	0	0	0	0	0	0	0	0	0	0	0	0	0	0	0	0	0
k__Bacteria;p__Firmicutes;c__Clostridia;o__Clostridiales;f__Christensenellaceae;g__	0	0	0	0	0	0	0	0	0	0	0	0	0	0	0	0	0	0	0	0	0	0	0
k__Bacteria;p__Firmicutes;c__Bacilli;o__Bacillales;f__Bacillaceae;g__Sinibacillus	0	0	0	0	0	0	0	0	0	0	0	0	0	0	0	0	0	0	0	0	0	0	0
k__Bacteria;p__Bacteroidetes;c__Ignavibacteria;o__SJA-28;f__uncultured_bacterium;g__<empty>	0	0	0	0	0	0	0	0	0	0	0	0	0	0	0	0	0	0	0	0.000114568	0	0	0
k__Bacteria;p__Firmicutes;c__Bacilli;o__Lactobacillales;f__Aerococcaceae;g__Aerococcus	0	0	0	0	0	0	0	0	0	0	0	0	0	0	0	0	0	0	0	0	0	0	0
k__Bacteria;p__TA06;c__uncultured_bacterium;o__<empty>;f__<empty>;g__	0	0	0	0	0	0	0	0	0	0	0	0	0	0	0	0	0	0	0	0	0	0	0
k__Bacteria;p__Proteobacteria;c__Alphaproteobacteria;o__;f__;g__	0	0	0	0	0	0	0	0	0	0	0	0	0	0	0	0	0	0	0	0	0	0	0
k__Bacteria;p__Proteobacteria;c__Deltaproteobacteria;o__Myxococcales;f__PS-B29;g__uncultured_delta_proteobacterium	0	0	0	0	0	0	0	0	0	0	0	0	0	0	0	0	0	0	0	0	0	0	9.74507e-05

## Sheet: inoculum and NCs; 0.01% MRB
Table S2. Community analysis by 16S rRNA gene amplicon sequencing of the inoculum and negative control enrichments.
incoulum and negative controls
relative abundancies of taxa, with minimum relative abundance of OTUs set to 0.01%
sample nomenclature: negative control A t1-1 denotes: negative control, biological replicate A, time point 1, technical replicate 1
taxon	inoculum	negative control A t1-1	negative control A t1-2	negative control B t1-1	negative control B t1-2	negative control A t2-1	negative control A t2-2	negative control B t2-1	negative control B t2-2
k__Bacteria;p__Epsilonbacteraeota;c__Campylobacteria;o__Campylobacterales;f__Thiovulaceae;g__Sulfurimonas	0.00397636	0.0562681	0.0480178	0.0212624	0.0184171	0.374079	0.335915	0.397658	0.0340384
k__Bacteria;p__Proteobacteria;c__Deltaproteobacteria;o__Desulfarculales;f__Desulfarculaceae;g__Desulfatiglans	0.090751	0.0970307	0.0907949	0.0587766	0.0584493	0.0164472	0.0552985	0.0415261	0.0972924
k__Bacteria;p__Proteobacteria;c__Deltaproteobacteria;o__Desulfuromonadales;f__Desulfuromonadaceae;g__Desulfuromonas	0	0.000168767	0.000105737	0	0	0.210467	0.130502	0.166331	0.000946084
NA;p__;c__;o__;f__;g__	0.0770587	0.0699067	0.0765667	0.0474387	0.0499098	0.00750101	0.0392723	0.0213045	0.0605288
k__Bacteria;p__Planctomycetes;c__Phycisphaerae;o__MSBL9;f__SG8-4;g__uncultured_bacterium	0.0636339	0.0399399	0.0460881	0.0919626	0.0904184	0.0211869	0.0171375	0.0116092	0.0437872
k__Bacteria;p__Chloroflexi;c__Anaerolineae;o__Thermoflexales;f__Thermoflexaceae;g__Thermoflexus	0.0463301	0.0473445	0.0503704	0.0490547	0.0386713	0.0166106	0.0175359	0.01793	0.0461524
k__Bacteria;p__Firmicutes;c__Clostridia;o__Clostridiales;f__Clostridiales_Incertae_Sedis;g__Dethiosulfatibacter	0.00133761	0.0731607	0.060845	0.020285	0.0192336	0.0139784	0.0435916	0.0271216	0.0359306
k__Bacteria;p__Chloroflexi;c__Anaerolineae;o__Anaerolineales;f__Anaerolineaceae;g__uncultured	0.0592076	0.0173989	0.0183255	0.0434231	0.0413591	0.021488	0.00881337	0.0112314	0.0283311
k__Bacteria;p__Acidobacteria;c__Aminicenantia;o__Aminicenantales;f__uncultured_bacterium;g__<empty>	0.0357629	0.0312484	0.0315889	0.0312706	0.0296216	0.00943648	0.0175638	0.0150592	0.0344086
k__Bacteria;p__Atribacteria;c__JS1;o__uncultured_bacterium;f__<empty>;g__<empty>	0.0276156	0.0284637	0.0257337	0.0183696	0.0184284	0.00749241	0.0205762	0.0203475	0.0364242
k__Bacteria;p__Acetothermia;c__Acetothermiia;o__uncultured_bacterium;f__<empty>;g__<empty>	0.04329	0.0132377	0.0158804	0.0403674	0.0361651	0.0111053	0.0045919	0.00486024	0.0143866
k__Archaea;p__Euryarchaeota;c__Thermoplasmata;o__Marine_Benthic_Group_D_and_DHVEG-1;f__uncultured_archaeon;g__<empty>	0.0264604	0.0173883	0.0248746	0.0223588	0.0227605	0.00588382	0.00937251	0.0064971	0.0224181
k__Bacteria;p__Firmicutes;c__Clostridia;o__Clostridiales;f__Family_XII;g__Fusibacter	0.000133761	0.0466906	0.02578	0.0100434	0.0091405	0.00596124	0.0196606	0.0175523	0.021472
k__Bacteria;p__Zixibacteria;c__uncultured_bacterium;o__<empty>;f__<empty>;g__<empty>	0.0255606	0.0118243	0.0142613	0.0324375	0.0322526	0.00762144	0.00466179	0.00342483	0.0140781
k__Bacteria;p__Omnitrophicaeota;c__uncultured_bacterium;o__<empty>;f__<empty>;g__<empty>	0.0119899	0.0204314	0.0222444	0.00914519	0.00886832	0.000929024	0.0144397	0.00672375	0.01886
k__Bacteria;p__Chloroflexi;c__Dehalococcoidia;o__GIF9;f__uncultured_bacterium;g__<empty>	0.0158203	0.014899	0.0153385	0.0175991	0.0168181	0.00489458	0.00647898	0.00488542	0.0137079
k__Archaea;p__Nanoarchaeaeota;c__Woesearchaeia;o__;f__;g__	0.0189576	0.0162439	0.0168915	0.00927728	0.00781365	0.000369889	0.0093795	0.00616973	0.0117849
k__Bacteria;p__Chloroflexi;c__Anaerolineae;o__SBR1031;f__uncultured_organism;g__<empty>	0.00998346	0.00390802	0.0054058	0.0223148	0.0322072	0.0078795	0.00215267	0.00161168	0.00405171
k__Bacteria;p__Acetothermia;c__Acetothermiia;o__;f__;g__	0.0144705	0.0121776	0.0102961	0.0115184	0.0101044	0.0045505	0.00458491	0.00523798	0.0140267
k__Bacteria;p__Chloroflexi;c__Dehalococcoidia;o__MSBL5;f__uncultured_bacterium;g__<empty>	0.00767304	0.00409789	0.00613274	0.0182728	0.0229987	0.00690747	0.00236934	0.00193906	0.00559423
k__Bacteria;p__Chloroflexi;c__Anaerolineae;o__SBR1031;f__uncultured_bacterium;g__<empty>	0.0135221	0.00369179	0.00481103	0.0192546	0.0171016	0.00823219	0.0014887	0.00183833	0.00569707
k__Bacteria;p__Proteobacteria;c__Deltaproteobacteria;o__Desulfobacterales;f__Desulfobacteraceae;g__uncultured	0.00172674	0.00142925	0.00170501	0.00142219	0.00188253	0.00930745	0.00307525	0.0108789	0.0417614
k__Bacteria;p__Chloroflexi;c__Dehalococcoidia;o__GIF9;f__AB-539-J10;g__SCGC-AB-539-J10	0.00725959	0.0113391	0.0110561	0.00769658	0.00811985	0.0024688	0.00791876	0.00551498	0.0104995
k__Bacteria;p__Omnitrophicaeota;c__uncultured_bacterium;o__<empty>;f__<empty>;g__	0.0078068	0.0123886	0.0133493	0.0052925	0.00557956	0.00119569	0.00677253	0.00405439	0.0122991
k__Bacteria;p__Planctomycetes;c__Planctomycetacia;o__Pirellulales;f__Pirellulaceae;g__uncultured	0.0158082	0.00718844	0.00881581	0.0104089	0.00936731	0.00264944	0.00292847	0.00264417	0.00883354
k__Bacteria;p__Bacteroidetes;c__Bacteroidia;o__Bacteroidales;f__Bacteroidetes_BD2-2;g__uncultured_bacterium	0.00590982	0.011318	0.00921233	0.00589131	0.00535275	0.00222794	0.00687737	0.00657265	0.0124842
k__Bacteria;p__Aerophobetes;c__uncultured_bacterium;o__<empty>;f__<empty>;g__<empty>	0.00886473	0.0107431	0.00989301	0.00642849	0.00629402	0.00179783	0.007115	0.00418031	0.00740413
k__Bacteria;p__Planctomycetes;c__Phycisphaerae;o__MSBL9;f__SG8-4;g__	0.00865801	0.00408734	0.00474494	0.0144245	0.0139262	0.0033204	0.00134891	0.00191388	0.00717789
k__Bacteria;p__Cloacimonetes;c__Cloacimonadia;o__MSBL2;f__metagenome;g__<empty>	0.00813512	0.0107009	0.0104085	0.00349164	0.00319804	0.0012387	0.00690532	0.00450768	0.00821653
k__Archaea;p__Crenarchaeota;c__Bathyarchaeia;o__uncultured_archaeon;f__<empty>;g__<empty>	0.00929034	0.00293761	0.00403783	0.0138609	0.0153892	0.00434405	0.00130698	0.00125913	0.00318789
k__Bacteria;p__Proteobacteria;c__Deltaproteobacteria;o__Desulfobacterales;f__Desulfobacteraceae;g__SEEP-SRB1	0.00925385	0.00614419	0.00861095	0.00683357	0.00756416	0.00227955	0.00363438	0.00266935	0.00783604
k__Bacteria;p__Proteobacteria;c__Deltaproteobacteria;o__Desulfuromonadales;f__Desulfuromonadaceae;g__Pelobacter	0.000474245	0.00149254	0.002009	0.000325828	0.000226811	0.026331	0.00947036	0.0121632	0.0016248
k__Bacteria;p__Nitrospirae;c__Nitrospira;o__Nitrospirales;f__Nitrospiraceae;g__Nitrospira	0.0062503	0.0110859	0.0100582	0.00410807	0.00373105	0.00111827	0.00668866	0.00357593	0.00698251
k__Bacteria;p__Spirochaetes;c__Spirochaetia;o__Spirochaetales;f__Spirochaetaceae;g__Spirochaeta_2	0.00678535	0.00690892	0.00802279	0.00657819	0.00728065	0.00202149	0.00359245	0.00297154	0.00928602
k__Bacteria;p__Bacteroidetes;c__Bacteroidia;o__Bacteroidales;f__Marinifilaceae;g__Marinifilum	0.000158082	0.0112336	0.0106926	0.000418292	0.000907245	0.00565156	0.010973	0.00805842	0.00233436
k__Bacteria;p__LCP-89;c__uncultured_bacterium;o__<empty>;f__<empty>;g__<empty>	0.00656647	0.0078055	0.00674073	0.00517802	0.00542079	0.00144515	0.00352255	0.00319819	0.00886439
k__Bacteria;p__Proteobacteria;c__Deltaproteobacteria;o__Desulfobacterales;f__Desulfobacteraceae;g__Desulfoconvexum	0.0015565	0.000833289	0.00134815	0.00298528	0.00322072	0.0121891	0.00266288	0.00788215	0.01487
k__Bacteria;p__Cyanobacteria;c__Oxyphotobacteria;o__Synechococcales;f__Cyanobiaceae;g__Synechococcus_CC9902	0.00904713	0.0035072	0.00473833	0.0091628	0.00863017	0.00294191	0.0018102	0.00161168	0.00540913
k__Bacteria;p__Proteobacteria;c__Gammaproteobacteria;o__Betaproteobacteriales;f__Burkholderiaceae;g__Delftia	0.00119169	0.0162913	0.011717	0.0042974	0.0024609	0.00116988	0.0023274	0.00153614	0.00414426
k__Archaea;p__Nanoarchaeaeota;c__Woesearchaeia;o__marine_metagenome;f__<empty>;g__<empty>	0.00772168	0.00591741	0.00652264	0.00490062	0.00461561	0.000894616	0.0045919	0.00277008	0.00420596
k__Bacteria;p__Proteobacteria;c__Deltaproteobacteria;o__Desulfovibrionales;f__Desulfovibrionaceae;g__Desulfovibrio	0	0	0	0	0	0.0312944	0.00378115	0.00533871	0.000164536
k__Bacteria;p__Planctomycetes;c__Planctomycetacia;o__Pirellulales;f__Pirellulaceae;g__Pir4_lineage	0.00766088	0.00107062	0.00183718	0.0123638	0.0127808	0.00235697	0.000251611	0.000201461	0.00123402
k__Bacteria;p__Cyanobacteria;c__Oxyphotobacteria;o__Chloroplast;f__;g__	0.00418308	0.00457254	0.00487711	0.010651	0.00221141	0.00142794	0.00395588	0.00236716	0.00478184
k__Bacteria;p__Chloroflexi;c__Dehalococcoidia;o__GIF3;f__uncultured_bacterium;g__<empty>	0.00511941	0.00541638	0.00592787	0.00647692	0.00616927	0.000645156	0.00138386	0.00108285	0.00466872
k__Bacteria;p__Chloroflexi;c__Dehalococcoidia;o__GIF9;f__AB-539-J10;g__uncultured_bacterium	0.00358724	0.00556933	0.00534632	0.00426218	0.00468365	0.0016688	0.00322901	0.00279527	0.0045556
k__Bacteria;p__Planctomycetes;c__Phycisphaerae;o__Phycisphaerales;f__AKAU3564_sediment_group;g__uncultured_bacterium	0.00511941	0.00198829	0.00241873	0.00940497	0.0121911	0.00225374	0.000314514	0.000327373	0.00116204
k__Bacteria;p__Bacteroidetes;c__Bacteroidia;o__Bacteroidales;f__Bacteroidetes_BD2-2;g__	0.00449925	0.00562734	0.00451364	0.00305133	0.00244956	0.00107526	0.00316611	0.00387812	0.00662258
k__Bacteria;p__Proteobacteria;c__Deltaproteobacteria;o__Desulfovibrionales;f__Desulfomicrobiaceae;g__Desulfomicrobium	0	0	0	0	0	0.0226923	0.00403277	0.00604382	0
k__Archaea;p__Asgardaeota;c__Lokiarchaeia;o__uncultured_archaeon;f__<empty>;g__<empty>	0.00584902	0.00271083	0.00384618	0.00468487	0.00504655	0.00177203	0.00172633	0.00088139	0.0048024
k__Bacteria;p__Chloroflexi;c__Anaerolineae;o__SBR1031;f__uncultured_Chloroflexi_bacterium;g__<empty>	0.00352644	0.00152418	0.00197596	0.00750284	0.00677032	0.00203869	0.000740855	0.000579199	0.00283825
k__Bacteria;p__Planctomycetes;c__Phycisphaerae;o__MSBL9;f__4572-13;g__uncultured_bacterium	0.00357508	0.00301672	0.00276898	0.0028708	0.00237018	0.00110107	0.00120214	0.00244271	0.0067974
k__Bacteria;p__Proteobacteria;c__Deltaproteobacteria;o__Sva0485;f__;g__	0.00348996	0.0042561	0.0037074	0.00278715	0.00272174	0.000584941	0.00225052	0.00198942	0.00416482
k__Archaea;p__Euryarchaeota;c__Methanomicrobia;o__Methanosarcinales;f__Methanosarcinaceae;g__Methanococcoides	0.00261443	0.00359686	0.00674734	0.00164235	0.00157634	0.00334621	0.00280267	0.00135986	0.00169678
k__Bacteria;p__Proteobacteria;c__Gammaproteobacteria;o__Xanthomonadales;f__Xanthomonadaceae;g__Stenotrophomonas	0.000863369	0.00890248	0.00713724	0.00193295	0.00122478	0.000567737	0.00128601	0.00088139	0.00206699
k__Bacteria;p__Bacteroidetes;c__Bacteroidia;o__Bacteroidales;f__Bacteroidetes_BD2-2;g__uncultured_organism	0.00273603	0.00356521	0.00288794	0.00160272	0.00139489	0.000782789	0.00225751	0.00266935	0.00601586
k__Bacteria;p__Chloroflexi;c__Anaerolineae;o__ADurb.Bin180;f__uncultured_bacterium;g__	0.00527749	0.00113918	0.00136136	0.00504152	0.0048651	0.00196988	0.00052419	0.00078066	0.00190245
k__Bacteria;p__Calditrichaeota;c__Calditrichia;o__Calditrichales;f__Calditrichaceae;g__	0.00335619	0.00292179	0.00306637	0.00287961	0.00295989	0.000997841	0.00105537	0.000831025	0.00427794
k__Bacteria;p__Actinobacteria;c__WCHB1-81;o__uncultured_bacterium;f__<empty>;g__<empty>	0.00592198	0.0025737	0.00271612	0.00167757	0.0019279	0.00045591	0.00166343	0.00161168	0.00367122
k__Bacteria;p__Planctomycetes;c__Phycisphaerae;o__CCM11a;f__uncultured_bacterium;g__<empty>	0.0019821	0.00108644	0.00146049	0.00399359	0.0084147	0.00147956	0.000118816	0.000226643	0.00151168
k__Bacteria;p__Firmicutes;c__Clostridia;o__Clostridiales;f__GoM-GC232-4463-Bac1;g__	0	0.00517905	0.00413696	0	0	0.00389674	0.00338976	0.00271972	0.000894666
k__Archaea;p__Nanoarchaeaeota;c__Woesearchaeia;o__uncultured_euryarchaeote;f__<empty>;g__	0.0039034	0.00302199	0.00302011	0.00223236	0.00256297	0.00024946	0.00155859	0.00105767	0.00213897
k__Bacteria;p__Chloroflexi;c__Anaerolineae;o__Anaerolineales;f__Anaerolineaceae;g__Pelolinea	0.0034778	0.0024735	0.00230639	0.00191974	0.00184851	0.000877412	0.00158655	0.00156132	0.00334214
k__Bacteria;p__Cyanobacteria;c__Oxyphotobacteria;o__Synechococcales;f__Cyanobiaceae;g__Cyanobium_PCC-6307	0.00284547	0.00231	0.00246499	0.00305133	0.00281246	0.000799993	0.0013559	0.000931755	0.00234464
k__Bacteria;p__Proteobacteria;c__Deltaproteobacteria;o__Desulfuromonadales;f__Desulfuromonadaceae;g__	0	0	0	0	0	0.00363008	0.0079537	0.00674893	0
k__Archaea;p__Euryarchaeota;c__Thermoplasmata;o__Marine_Benthic_Group_D_and_DHVEG-1;f__;g__	0.00284547	0.00215706	0.00266986	0.00258461	0.00265369	0.000843004	0.00102042	0.000579199	0.00240634
k__Bacteria;p__Planctomycetes;c__Phycisphaerae;o__MSBL9;f__SM23-30;g__	0.00316163	0.00157692	0.00212135	0.00374261	0.00353826	0.000301073	0.000293546	0.000251826	0.0021184
k__Bacteria;p__Cloacimonetes;c__Cloacimonadia;o__Cloacimonadales;f__MSBL8;g__uncultured_bacterium	0.00229826	0.00295343	0.00268968	0.0018581	0.00184851	0.000524727	0.00111827	0.00120876	0.00234464
k__Archaea;p__Nanoarchaeaeota;c__Woesearchaeia;o__marine_metagenome;f__<empty>;g__	0.00339267	0.00200411	0.0030928	0.00188452	0.00172377	0.000232256	0.00204084	0.000503651	0.00196415
k__Bacteria;p__Calditrichaeota;c__Calditrichia;o__Calditrichales;f__Calditrichaceae;g__uncultured_bacterium	0.00316163	0.00268446	0.00220726	0.00275633	0.00223409	0.00049892	0.00060806	0.000478469	0.00200529
k__Bacteria;p__Nitrospirae;c__Nitrospira;o__Nitrospirales;f__Nitrospiraceae;g__	0.00188482	0.00303254	0.00294742	0.00124607	0.00132685	0.000447308	0.00211773	0.00133468	0.00223152
k__Archaea;p__Nanoarchaeaeota;c__Woesearchaeia;o__uncultured_crenarchaeote;f__<empty>;g__	0.00310083	0.00276357	0.00279542	0.00151466	0.00214337	0	0.000712898	0.000352556	0.0028691
k__Bacteria;p__Proteobacteria;c__Deltaproteobacteria;o__Desulfobacterales;f__Desulfobacteraceae;g__	0.000547206	0.000406097	0.000317211	0.000237766	0.000272174	0.00531608	0.00182418	0.00249307	0.00403114
k__Bacteria;p__Chloroflexi;c__Dehalococcoidia;o__FS117-23B-02;f__uncultured_bacterium;g__	0.00226178	0.00119192	0.00163231	0.0031482	0.00306195	0.000843004	0.000580103	0.000402921	0.00189217
k__Bacteria;p__Chloroflexi;c__Anaerolineae;o__Thermoflexales;f__Thermoflexaceae;g__	0.00217666	0.00218343	0.00218082	0.00236885	0.00190522	0.000507523	0.000747844	0.000654747	0.00197444
k__Bacteria;p__Planctomycetes;c__Phycisphaerae;o__MSBL9;f__SG8-4;g__uncultured_organism	0.00184834	0.00159802	0.00219404	0.00254938	0.00223409	0.000533329	0.000761822	0.000705112	0.00220067
k__Bacteria;p__Bacteroidetes;c__Bacteroidia;o__Bacteroidales;f__Prolixibacteraceae;g__Draconibacterium	0	0.000574864	0.000449382	0.000184929	0	0.00233976	0.00255805	0.00438177	0.00378433
k__Bacteria;p__Planctomycetes;c__Phycisphaerae;o__MSBL9;f__4572-13;g__	0.00170242	0.00213596	0.00171822	0.00148384	0.0015083	0.000395696	0.00127902	0.00113322	0.00265315
k__Bacteria;p__Firmicutes;c__Bacilli;o__Bacillales;f__Bacillaceae;g__Bacillus	0.00266307	0.00165603	0.00189666	0.00208706	0.00210935	0.000541931	0.000538168	0.000377739	0.0021184
k__Bacteria;p__Planctomycetes;c__Phycisphaerae;o__Phycisphaerales;f__AKAU3564_sediment_group;g__	0.00217666	0.000363905	0.000535293	0.00331111	0.00591978	0.00116128	0	0	0.000493609
k__Bacteria;p__Firmicutes;c__Clostridia;o__Clostridiales;f__;g__	0	0.0051685	0.00372723	0	0	0.000886014	0.00267686	0.00110803	0.00020567
k__Bacteria;p__TA06;c__uncultured_bacterium;o__<empty>;f__<empty>;g__	0.0017389	0.0014398	0.00167857	0.00165115	0.00171243	0.00061935	0.00086666	0.000604382	0.00271485
k__Bacteria;p__Planctomycetes;c__Phycisphaerae;o__CCM11a;f__uncultured_planctomycete;g__<empty>	0.00130113	0.000859659	0.0010045	0.00269909	0.00390116	0.00109246	0.000426341	0.000554017	0.000812398
k__Bacteria;p__Chloroflexi;c__Dehalococcoidia;o__;f__;g__	0.00178754	0.00100206	0.0011565	0.00321424	0.00281246	0.000782789	0.0005172	0.000277008	0.00109005
k__Bacteria;p__WOR-1;c__uncultured_bacterium;o__<empty>;f__<empty>;g__	0.00158082	0.00210432	0.0014671	0.00182728	0.00154232	0	0.000852682	0.000906573	0.00230351
k__Bacteria;p__WOR-1;c__uncultured_bacterium;o__<empty>;f__<empty>;g__<empty>	0.0018605	0.00201994	0.00175127	0.00196817	0.001565	0.000301073	0.000559136	0.000428104	0.00190245
k__Bacteria;p__Bacteroidetes;c__Ignavibacteria;o__SJA-28;f__uncultured_bacterium;g__<empty>	0.00162946	0.00187754	0.00149353	0.000920243	0.000827862	0.000309675	0.00137687	0.00123395	0.00252975
k__Bacteria;p__Chloroflexi;c__Anaerolineae;o__SBR1031;f__uncultured_organism;g__	0.00196994	0.000838563	0.00113667	0.00267267	0.00311866	0.000713972	0.000377417	0.00010073	0.000997501
k__Bacteria;p__AncK6;c__uncultured_bacterium;o__<empty>;f__<empty>;g__<empty>	0.0022861	0.000864933	0.00107059	0.00274752	0.00242688	0.000946228	0.000370427	0.000428104	0.000781547
k__Bacteria;p__Latescibacteria;c__Latescibacteria;o__Latescibacterales;f__Latescibacteraceae;g__uncultured_bacterium	0.00169026	0.00120247	0.00139441	0.00191093	0.00210935	0.00024946	0.000594082	0.000629564	0.00182018
k__Archaea;p__Nanoarchaeaeota;c__Woesearchaeia;o__uncultured_crenarchaeote;f__<empty>;g__<empty>	0.00207938	0.00189863	0.00229978	0.00116241	0.00144025	0.000163439	0.00078279	0.000226643	0.00149111
k__Bacteria;p__Latescibacteria;c__uncultured_bacterium;o__<empty>;f__<empty>;g__<empty>	0.00153218	0.000585412	0.000766592	0.00264625	0.00347021	0.00114408	0.000146773	0.000176278	0.00055531
k__Bacteria;p__Firmicutes;c__Clostridia;o__Clostridiales;f__Defluviitaleaceae;g__Defluviitaleaceae_UCG-011	0.000121601	0.00282158	0.00198918	0.000700089	0.000884564	0.00045591	0.00177526	0.000805842	0.0011209
k__Bacteria;p__Chloroflexi;c__Dehalococcoidia;o__Sh765B-AG-111;f__uncultured_bacterium;g__<empty>	0.00169026	0.00121829	0.00153979	0.00144421	0.00132685	0.000567737	0.000768811	0.000730295	0.00125459
k__Bacteria;p__Proteobacteria;c__Deltaproteobacteria;o__Sva0485;f__uncultured_bacterium;g__<empty>	0.00126465	0.00181425	0.00183057	0.00130331	0.00138355	0.000163439	0.000719887	0.000251826	0.0017482
k__Bacteria;p__Latescibacteria;c__Latescibacteria;o__Latescibacterales;f__Latescibacteraceae;g__Candidatus_Latescibacter	0.00248067	0.00136069	0.00167196	0.00174802	0.0019279	0	0	0	0.00116204
k__Bacteria;p__WS2;c__uncultured_bacterium;o__<empty>;f__<empty>;g__<empty>	0.00143489	0.000189863	0.000482425	0.00350044	0.00327742	0.000894616	0	0	0.000565593
k__Bacteria;p__Chloroflexi;c__Anaerolineae;o__ADurb.Bin180;f__uncultured_bacterium;g__<empty>	0.00235906	0.000638152	0.000713724	0.002294	0.00248358	0.000791391	0	0	0.00102835
k__Bacteria;p__Omnitrophicaeota;c__;o__;f__;g__	0.000790408	0.00157165	0.00251786	0.00103913	0.000510326	0	0.00177526	0.000302191	0.00155281
k__Bacteria;p__Firmicutes;c__Clostridia;o__Clostridiales;f__Clostridiaceae_1;g__Clostridium_sensu_stricto_7	0	0.0019461	0.00145388	0.00153667	0.00163304	0.000283869	0.000859671	0.000730295	0.00113119
k__Bacteria;p__Proteobacteria;c__Deltaproteobacteria;o__10bav-F6;f__uncultured_bacterium;g__<empty>	0.00166594	0.00114973	0.0013151	0.00162473	0.0016217	0.000180644	0.000461287	0.000251826	0.00121345
k__Archaea;p__Diapherotrites;c__Micrarchaeia;o__uncultured_euryarchaeote;f__<empty>;g__<empty>	0.00137409	0.00067507	0.000839287	0.00218393	0.00226811	0.000636554	0.000293546	0.000151095	0.000822681
k__Bacteria;p__Planctomycetes;c__SPG12-343-353-B69;o__uncultured_bacterium;f__<empty>;g__	0.0015565	0.000390275	0.000574944	0.0030073	0.00298257	0	0	0	0.000565593
k__Bacteria;p__Planctomycetes;c__Phycisphaerae;o__DG-20;f__uncultured_bacterium;g__<empty>	0.00164162	0.000738358	0.000621204	0.00217952	0.00292587	0.000232256	0	0.000402921	0.000267371
k__Archaea;p__Nanoarchaeaeota;c__Woesearchaeia;o__uncultured_archaeon;f__<empty>;g__	0.00190914	0.00150836	0.00206187	0.000356649	0.000374239	0	0.00095053	0	0.00183047
k__Bacteria;p__Chloroflexi;c__Dehalococcoidia;o__GIF9;f__AB-539-J10;g__	0.00121601	0.00141343	0.00139441	0.00123726	0.00122478	0.000240858	0.00110429	0.000277008	0.000699279
k__Bacteria;p__Chloroflexi;c__Dehalococcoidia;o__FW22;f__uncultured_bacterium;g__<empty>	0.00130113	0.000812193	0.000852504	0.00193295	0.00208666	0.00066236	0.000279568	0.000176278	0.000678712
k__Archaea;p__Euryarchaeota;c__Thermococci;o__Methanofastidiosales;f__uncultured;g__	0.00098497	0.00112336	0.0018504	0.00116681	0.00138355	0.000111827	0.000810747	0.000402921	0.000853532
k__Archaea;p__Nanoarchaeaeota;c__Nanohaloarchaeia;o__Aenigmarchaeales;f__uncultured_archaeon;g__<empty>	0.00126465	0.00157692	0.00167196	0.000409486	0.000646412	0.000120429	0.000999455	0.000377739	0.00130601
k__Bacteria;p__Chlamydiae;c__LD1-PA32;o__metagenome;f__<empty>;g__	0.000522885	0.00134487	0.00153318	0.00117122	0.00104333	0.000275266	0.000838703	0.000377739	0.00104892
k__Bacteria;p__Nitrospirae;c__;o__;f__;g__	0.000851209	0.0016824	0.00157944	0.000510757	0.00040826	0.000111827	0.00108333	0.000654747	0.00125459
k__Bacteria;p__Cyanobacteria;c__Oxyphotobacteria;o__Chloroplast;f__uncultured_bacterium;g__<empty>	0.00138625	0.00117082	0.00144727	0.000726507	0.000498985	0	0.00100644	0.000705112	0.00113119
k__Bacteria;p__Patescibacteria;c__Parcubacteria;o__uncultured_bacterium;f__<empty>;g__	0.00127681	0.00162966	0.00179092	0.000193735	0.00060105	0	0.000929563	0.000277008	0.00127516
k__Bacteria;p__Marinimicrobia_(SAR406_clade);c__uncultured_bacterium;o__<empty>;f__<empty>;g__<empty>	0.000875529	0.00145562	0.00148692	0.000849793	0.000918586	0	0.000580103	0.000251826	0.00135742
k__Bacteria;p__Planctomycetes;c__Phycisphaerae;o__MSBL9;f__SM23-30;g__uncultured_bacterium	0.00122817	0.00108644	0.000561727	0.00151466	0.00121344	0.000154837	0.00043333	0.000302191	0.00121345
k__Bacteria;p__Fibrobacteres;c__Chitinivibrionia;o__uncultured;f__uncultured_bacterium;g__<empty>	0.00111873	0.000722536	0.00105076	0.00181407	0.00132685	0.000318277	0.000153762	0.000277008	0.000884382
k__Bacteria;p__Planctomycetes;c__Phycisphaerae;o__CCM11a;f__uncultured_planctomycete;g__	0.000620166	0.000474659	0.000621204	0.00199459	0.00227945	0.000713972	0.000188708	0.00010073	0.000627295
k__Bacteria;p__Acidobacteria;c__Subgroup_9;o__uncultured_bacterium;f__<empty>;g__	0.00105793	0.000453563	0.000561727	0.00192414	0.0019279	0.000507523	0.000300535	0.000226643	0.000637578
k__Bacteria;p__WOR-1;c__;o__;f__;g__	0.00099713	0.00121302	0.00121597	0.00110077	0.000873224	0	0.000656984	0.000604382	0.000874099
k__Bacteria;p__Aegiribacteria;c__uncultured_bacterium;o__<empty>;f__<empty>;g__<empty>	0.00217666	0.000537946	0.00054851	0.00162473	0.000963948	0.000309675	0.000223654	0.000176278	0.000966651
k__Bacteria;p__Aerophobetes;c__;o__;f__;g__	0.000826888	0.00130795	0.00101111	0.000761732	0.000680434	0.000223654	0.000838703	0.000654747	0.0010592
k__Bacteria;p__Acidobacteria;c__Aminicenantia;o__Aminicenantales;f__uncultured_Aminicenantes_bacterium;g__<empty>	0.000912009	0.00124466	0.000898764	0.000951064	0.000759818	0.00020645	0.00069193	0.000629564	0.0010592
k__Bacteria;p__Chloroflexi;c__Dehalococcoidia;o__vadinBA26;f__uncultured_bacterium;g__<empty>	0.000741768	0.00114445	0.00114328	0.00135174	0.00105467	0.00024946	0.00060806	0.000251826	0.000802114
k__Bacteria;p__Hydrogenedentes;c__Hydrogenedentia;o__Hydrogenedentiales;f__Hydrogenedensaceae;g__uncultured_organism	0.00159298	0.000400823	0.000482425	0.0021443	0.00181449	0.000275266	0.000195697	0.000125913	0.000308505
k__Bacteria;p__Bacteroidetes;c__Bacteroidia;o__Bacteroidales;f__Bacteroidetes_vadinHA17;g__	0	0.000907125	0.000508859	0.000383068	0.000294855	0.000507523	0.000922574	0.00171242	0.00208755
k__Bacteria;p__BRC1;c__uncultured_bacterium;o__<empty>;f__<empty>;g__<empty>	0.000924169	0.000121302	0.000198257	0.00234684	0.00291453	0.000352685	0	0	0.000370207
k__Bacteria;p__Acidobacteria;c__Acidobacteriia;o__Solibacterales;f__Solibacteraceae_(Subgroup_3);g__Bryobacter	0.00126465	0.000928221	0.000826069	0.00110517	0.00113406	0.000275266	0.00034946	0.000327373	0.0009358
k__Bacteria;p__Patescibacteria;c__Gracilibacteria;o__uncultured_marine_bacterium;f__<empty>;g__<empty>	0.000924169	0.00114973	0.000852504	0.000488741	0.000578369	0.000266664	0.000887628	0.000805842	0.00114147
k__Bacteria;p__Dependentiae;c__Babeliae;o__Babeliales;f__uncultured_bacterium;g__	0.00111873	0.000875481	0.00163231	0.000449114	0.000691775	0.000180644	0.000440319	0.000251826	0.00141913
k__Archaea;p__Euryarchaeota;c__Thermoplasmata;o__uncultured;f__uncultured_archaeon;g__<empty>	0.00113089	0.000400823	0.000601379	0.00189332	0.00183717	0.000240858	0.000272579	0.00010073	0.000514176
k__Bacteria;p__Proteobacteria;c__Deltaproteobacteria;o__Desulfobacterales;f__Desulfobulbaceae;g__	0	0.000137124	0.000218082	0.000405083	0.00040826	0.00281288	0.000838703	0.00118358	0.000956367
k__Bacteria;p__Chloroflexi;c__Anaerolineae;o__ADurb.Bin180;f__uncultured_organism;g__<empty>	0.00116737	0.000770002	0.000812852	0.00145742	0.00112272	0.000318277	0.000342471	0.000277008	0.000627295
k__Archaea;p__Diapherotrites;c__Micrarchaeia;o__uncultured_euryarchaeote;f__<empty>;g__	0.000705287	0.00111808	0.00126884	0.00073091	0.000759818	0.000275266	0.000587092	0.000528834	0.000915233
k__Bacteria;p__Chlamydiae;c__LD1-PA32;o__uncultured_bacterium;f__<empty>;g__	0.000668807	0.00106007	0.00102433	0.00161153	0.00124746	0.000189246	0	0.000125913	0.000863815
k__Bacteria;p__Chloroflexi;c__Anaerolineae;o__Anaerolineales;f__Anaerolineaceae;g__	0.00483973	0.000290069	0.000277559	0	0.000260833	0.000524727	0	0.000176278	0.000298222
k__Bacteria;p__Latescibacteria;c__;o__;f__;g__	0.000802568	0.000274247	0.000356862	0.00173921	0.00249493	0.000550533	0	0.000176278	0.000195387
k__Bacteria;p__Chloroflexi;c__Dehalococcoidia;o__Napoli-4B-65;f__uncultured_bacterium;g__<empty>	0.00125249	0.000606508	0.000693898	0.0015763	0.00102065	0.000335481	0.000139784	0	0.000884382
k__Bacteria;p__Epsilonbacteraeota;c__Campylobacteria;o__Campylobacterales;f__Thiovulaceae;g__	0	0	0	0	0	0.00108386	0.0024602	0.00292118	0
k__Bacteria;p__Acidobacteria;c__Subgroup_22;o__;f__;g__	0.00111873	0.000443015	0.000541902	0.00138257	0.00137221	0.000516125	0.000181719	0.000226643	0.000606727
k__Bacteria;p__Patescibacteria;c__Microgenomatia;o__uncultured_bacterium;f__<empty>;g__<empty>	0.00104577	0.000796371	0.000964849	0.000140898	0.000487644	0	0.000726876	0.000654747	0.00142941
k__Bacteria;p__Elusimicrobia;c__Elusimicrobia;o__MD2894-B20;f__uncultured_bacterium;g__<empty>	0.000437764	0.00123411	0.000905372	0.000501951	0.000385579	0	0.000845693	0.000730295	0.00120317
k__Bacteria;p__Patescibacteria;c__Parcubacteria;o__GWA2-38-13b;f__uncultured_bacterium;g__<empty>	0.000839049	0.000970413	0.000845895	0.000704492	0.000498985	0.000197848	0.000838703	0.000428104	0.000822681
k__Bacteria;p__Actinobacteria;c__WCHB1-81;o__;f__;g__	0.00111873	0.000748906	0.000700507	0.000603221	0.000714456	0.000163439	0.000377417	0.000478469	0.00119289
k__Bacteria;p__Planctomycetes;c__Phycisphaerae;o__Pla1_lineage;f__uncultured_bacterium;g__<empty>	0.000571526	0.00013185	0.000555119	0.00176123	0.0019846	0.000584941	0	0	0.000473042
k__Bacteria;p__Chloroflexi;c__Dehalococcoidia;o__SPG12-343-353-B75;f__uncultured_bacterium;g__<empty>	0.000717447	0.00125521	0.00125563	0.000616431	0.000612391	0	0.000510211	0.000151095	0.0009358
k__Bacteria;p__Chloroflexi;c__Dehalococcoidia;o__uncultured_bacterium;f__<empty>;g__<empty>	0.000437764	0.00100206	0.00122919	0.000585609	0.00079384	0	0.000125806	0.000251826	0.00161451
k__Bacteria;p__Patescibacteria;c__Gracilibacteria;o__;f__;g__	0.00107009	0.00119192	0.000978066	0.000387471	0.000430942	0.000120429	0.000615049	0.000226643	0.000863815
k__Bacteria;p__Cloacimonetes;c__Cloacimonadia;o__Cloacimonadales;f__MSBL8;g__	0.000912009	0.000859659	0.0011565	0.000620834	0.000533007	0.000240858	0.000587092	0.000251826	0.000699279
k__Bacteria;p__Bacteroidetes;c__Bacteroidia;o__Sphingobacteriales;f__Lentimicrobiaceae;g__uncultured_bacterium	0.00120385	0.00072781	0.000997892	0.000537175	0.000340217	0	0.000328492	0.000277008	0.00130601
k__Bacteria;p__Proteobacteria;c__Gammaproteobacteria;o__Oceanospirillales;f__Halomonadaceae;g__Halomonas	0	0.00056959	0.000508859	0.000250975	0.00020413	0	0.000181719	0.00010073	0.00385632
k__Bacteria;p__Proteobacteria;c__Deltaproteobacteria;o__Desulfuromonadales;f__;g__	0	0	0	0	0	0.000860208	0.00253708	0.00221607	0
k__Bacteria;p__Proteobacteria;c__Deltaproteobacteria;o__Syntrophobacterales;f__Syntrophaceae;g__uncultured	0.00159298	0.000791098	0.000799635	0.000576803	0.000328876	0	0.000146773	0	0.00134714
k__Bacteria;p__Chloroflexi;c__Dehalococcoidia;o__S085;f__uncultured_bacterium;g__<empty>	0.000291843	0.000226781	0.000211474	0.00118002	0.00261967	0.000774187	0	0	0.000185103
k__Bacteria;p__Elusimicrobia;c__Lineage_IIb;o__uncultured_bacterium;f__<empty>;g__	0.000741768	0.000812193	0.000859112	0.000638446	0.000544347	0.000129031	0.000510211	0.000629564	0.000617011
k__Bacteria;p__Elusimicrobia;c__4-29;o__uncultured_bacterium;f__<empty>;g__	0.000875529	0.00114445	0.000865721	0.000598818	0.000510326	0	0.000838703	0.000352556	0.000267371
k__Bacteria;p__Kiritimatiellaeota;c__Kiritimatiellae;o__WCHB1-41;f__uncultured_bacterium;g__	0.0020429	0.000901851	0.000951632	0.000545981	0.000714456	0	9.78487e-05	0	0.000185103
k__Bacteria;p__Aegiribacteria;c__uncultured_sediment_bacterium;o__<empty>;f__<empty>;g__<empty>	0.00165378	0.000469385	0.000416339	0.000924646	0.00079384	0.000189246	0.000153762	0.000201461	0.000565593
k__Bacteria;p__Proteobacteria;c__Deltaproteobacteria;o__Desulfobacterales;f__Desulfobacteraceae;g__Desulfoluna	0	0	0	0	0	0.00378491	0.000545157	0.0010073	0
k__Bacteria;p__Kiritimatiellaeota;c__Kiritimatiellae;o__Kiritimatiellales;f__Kiritimatiellaceae;g__R76-B128	0	0	0	0	0	0.000576339	0	0.000730295	0.00382547
k__Bacteria;p__Firmicutes;c__Clostridia;o__Clostridiales;f__Lachnospiraceae;g__uncultured	0	0.000838563	0.000555119	0.000242169	0.000283514	0	0.000824725	0.000931755	0.00144998
k__Bacteria;p__CK-2C2-2;c__uncultured_bacterium;o__<empty>;f__<empty>;g__<empty>	0.000778248	0.000421919	0.000356862	0.000427098	0.000680434	0.000292471	0.000740855	0.000554017	0.000750697
k__Bacteria;p__Planctomycetes;c__vadinHA49;o__uncultured_bacterium;f__<empty>;g__<empty>	0.000620166	0.000527398	0.000449382	0.00132973	0.00105467	0	0.000265589	0	0.000668429
k__Bacteria;p__Spirochaetes;c__Spirochaetia;o__Spirochaetales;f__Spirochaetaceae;g__Sediminispirochaeta	0.000316163	0.000537946	0.00068729	0.000532772	0.000680434	0.000318277	0.000342471	0.000478469	0.000966651
k__Bacteria;p__Acidobacteria;c__;o__;f__;g__	0.000668807	0.000311165	0.000489033	0.00132092	0.00130417	0.000283869	0	0	0.000401057
k__Bacteria;p__Proteobacteria;c__Gammaproteobacteria;o__Alteromonadales;f__Psychromonadaceae;g__Psychromonas	0.000522885	0.000232055	0.000449382	0.000418292	0.000657753	0.000197848	0.000796768	0.00078066	0.000699279
k__Bacteria;p__Chloroflexi;c__Dehalococcoidia;o__H3.93;f__uncultured_bacterium;g__<empty>	0.000705287	0.000611782	0.000819461	0.000616431	0.00104333	0	0.000405373	0	0.000545026
k__Bacteria;p__Patescibacteria;c__Microgenomatia;o__Candidatus_Woesebacteria;f__uncultured_bacterium;g__	0.000608006	0.000601234	0.000726941	0.000259781	0.000419601	0.000180644	0.000552146	0.000478469	0.000596444
k__Archaea;p__Nanoarchaeaeota;c__Nanohaloarchaeia;o__Aenigmarchaeales;f__uncultured_archaeon;g__	0.000741768	0.00054322	0.000872329	0.000559191	0.000646412	0.000129031	0.0002586	0	0.000658145
k__Bacteria;p__Chloroflexi;c__Dehalococcoidia;o__FW22;f__uncultured_organism;g__<empty>	0.000839049	0.000485206	0.000508859	0.00084539	0.000963948	0.000275266	0	0	0.000431908
k__Bacteria;p__Omnitrophicaeota;c__Omnitrophia;o__uncultured_bacterium;f__<empty>;g__<empty>	0.000389124	0.000764728	0.000911981	0.000224557	0.000464963	0	0.000503222	0.000377739	0.000647862
k__Bacteria;p__Zixibacteria;c__uncultured_candidate_division_TA06_bacterium;o__<empty>;f__<empty>;g__<empty>	0.000559366	0.000385001	0.000726941	0.000484338	0.000827862	0	0.000293546	0	0.000987218
k__Bacteria;p__Bacteroidetes;c__Bacteroidia;o__Bacteroidales;f__SB-5;g__uncultured_bacterium	0.000413444	0.000537946	0.000555119	0.000356649	0.000226811	0.000163439	0.000538168	0.000805842	0.000658145
k__Bacteria;p__Planctomycetes;c__Planctomycetacia;o__Pirellulales;f__Pirellulaceae;g__	0.000790408	0.000290069	0.000350253	0.000818972	0.00104333	0.000275266	0.000188708	0	0.000390774
k__Bacteria;p__Acidobacteria;c__Aminicenantia;o__Aminicenantales;f__uncultured_bacterium;g__	0.000644487	0.000617056	0.000773201	0.000713298	0.00039692	0	0.000230643	0.000226643	0.000503892
k__Bacteria;p__Patescibacteria;c__Gracilibacteria;o__Candidatus_Peribacteria;f__uncultured_bacterium;g__<empty>	0.000620166	0.00056959	0.00045599	0.000598818	0.000714456	0.000283869	0.00017473	0.000151095	0.000473042
k__Bacteria;p__Actinobacteria;c__RBG-16-55-12;o__uncultured_bacterium;f__<empty>;g__<empty>	0.00107009	0.000242603	0.000495642	0.000955467	0.000635072	0.000387093	0	0	0.000215954
k__Bacteria;p__Poribacteria;c__uncultured_bacterium;o__<empty>;f__<empty>;g__<empty>	0.000887689	0.00062233	0.000607987	0.000893824	0.000578369	0	0.000160751	0	0.000215954
k__Bacteria;p__LCP-89;c__uncultured_bacterium;o__<empty>;f__<empty>;g__	0.000899849	0.00049048	0.000799635	0.000462323	0.000317536	0	0	0	0.000987218
k__Bacteria;p__WS1;c__uncultured_bacterium;o__<empty>;f__<empty>;g__	0.000510725	8.96577e-05	0.000112345	0.000920243	0.00170109	0.000610747	0	0	0
k__Bacteria;p__Hydrogenedentes;c__Hydrogenedentia;o__Hydrogenedentiales;f__Hydrogenedensaceae;g__uncultured_bacterium	0.000522885	0	0	0.00116241	0.00206398	0.000137633	0	0	0
k__Bacteria;p__Dependentiae;c__Babeliae;o__Babeliales;f__Vermiphilaceae;g__uncultured_bacterium	0.000693127	0.00075418	0.000654247	0.000189332	0.000306195	0	0.000370427	0.000327373	0.000565593
k__Bacteria;p__Patescibacteria;c__Parcubacteria;o__Candidatus_Yanofskybacteria;f__uncultured_bacterium;g__	0.000535045	0.000590686	0.00113667	0.000105674	0.000328876	0	0.000265589	0.000125913	0.000750697
k__Bacteria;p__Kiritimatiellaeota;c__Kiritimatiellae;o__WCHB1-41;f__;g__	0.00104577	0.000617056	0.000806244	0.000634043	0.00058971	0	0	0	0.000113119
k__Bacteria;p__BRC1;c__uncultured_organism;o__<empty>;f__<empty>;g__<empty>	0.000364804	0.000137124	0.000237908	0.00107435	0.00133819	0.000318277	0.000118816	0	0.00020567
k__Bacteria;p__Atribacteria;c__JS1;o__;f__;g__	0.000522885	0.000311165	0.000389905	0.000303812	0.000215471	0.000197848	0.000405373	0.000478469	0.000946084
k__Bacteria;p__Bacteroidetes;c__Bacteroidia;o__Bacteroidales;f__Prolixibacteraceae;g__	0.000158082	0.000395549	0.000363471	0.000321424	0.000226811	0.000507523	0.00052419	0.000679929	0.000565593
k__Bacteria;p__BHI80-139;c__uncultured_bacterium;o__<empty>;f__<empty>;g__<empty>	0.00096065	0.000390275	0.000105737	0.00101271	0.000941267	0	0	0	0.000257088
k__Bacteria;p__Patescibacteria;c__Gracilibacteria;o__uncultured_organism;f__<empty>;g__<empty>	0.000559366	0.000537946	0.000581553	0.000211348	0.000260833	0	0.000300535	0.000277008	0.000915233
k__Bacteria;p__Proteobacteria;c__Deltaproteobacteria;o__Myxococcales;f__bacteriap25;g__	0.000875529	0.000353357	0.000356862	0.00078815	0.000669094	0.000232256	9.08595e-05	0.000125913	0.000143969
k__Bacteria;p__Fibrobacteres;c__Fibrobacteria;o__Fibrobacterales;f__SBXY-748;g__	0.00110657	0.00070144	0.000581553	0.000431501	0.000453623	0	0.00034946	0	0
k__Bacteria;p__Planctomycetes;c__Phycisphaerae;o__MSBL9;f__L21-RPul-D3;g__uncultured_bacterium	0.000510725	0.000300617	0.000370079	0.000986289	0.000861883	0	0	0	0.000524459
k__Bacteria;p__Proteobacteria;c__Deltaproteobacteria;o__Desulfobacterales;f__Desulfobacteraceae;g__Desulfatirhabdium	0.000571526	0.000522124	0.000647638	0.000299409	0.000340217	0.000129031	0.000335481	0	0.000678712
k__Bacteria;p__Chloroflexi;c__Anaerolineae;o__Anaerolineales;f__Anaerolineaceae;g__Longilinea	0.000632326	0.000342809	0.000535293	0.000268588	0.00020413	0.000111827	0.000307525	0.000402921	0.000627295
k__Bacteria;p__Bacteroidetes;c__Bacteroidia;o__Bacteroidales;f__Marinilabiliaceae;g__Carboxylicivirga	0.000121601	0.000606508	0.000713724	0.000374261	0	0.000129031	0.000482254	0.000503651	0.000483325
k__Bacteria;p__Firmicutes;c__Clostridia;o__Clostridiales;f__uncultured;g__uncultured_bacterium	0	0	0	0	0	0.000567737	0.000265589	0.000906573	0.00160423
k__Bacteria;p__Omnitrophicaeota;c__uncultured_Latescibacteria_bacterium;o__<empty>;f__<empty>;g__<empty>	0.000510725	0.000653974	0.00064103	0.000259781	0.000306195	0	0.000475265	0.000151095	0.000287938
k__Bacteria;p__Chlamydiae;c__LD1-PA32;o__metagenome;f__<empty>;g__<empty>	8.51209e-05	0.000448289	0.000832678	0.000642849	0.000521666	0	0	0	0.00058616
k__Bacteria;p__Chloroflexi;c__Dehalococcoidia;o__Sh765B-AG-111;f__uncultured_bacterium;g__	0.000231042	0.00051685	0.00054851	0.000532772	0.000510326	0	0.000118816	0	0.000658145
k__Bacteria;p__Latescibacteria;c__Latescibacteria;o__Latescibacterales;f__Latescibacteraceae;g__	0.000547206	0.000453563	0.000482425	0.000325828	0.000544347	0	0.000195697	0	0.00055531
k__Bacteria;p__Patescibacteria;c__Parcubacteria;o__;f__;g__	0.000389124	0.000390275	0.000720333	0.000211348	0.000272174	0	0.000265589	0.000176278	0.000627295
k__Bacteria;p__Firmicutes;c__Clostridia;o__Clostridiales;f__JTB215;g__	0	0.000358631	0.000303994	0	0	0.000541931	0.000643006	0.00118358	0
k__Bacteria;p__Elusimicrobia;c__Elusimicrobia;o__Lineage_IV;f__uncultured_bacterium;g__<empty>	0.000851209	0.000443015	0.000495642	0.000713298	0.000521666	0	0	0	0
k__Bacteria;p__Patescibacteria;c__Parcubacteria;o__Candidatus_Nealsonbacteria;f__uncultured_bacterium;g__<empty>	0.000778248	0.000775276	0.000495642	0	0	0	0.000370427	0.000302191	0.000257088
k__Bacteria;p__Planctomycetes;c__Phycisphaerae;o__Phycisphaerales;f__Phycisphaeraceae;g__CL500-3	0.000717447	0.000559042	0.000284168	0.000761732	0.000272174	0	0	0	0.00038049
k__Bacteria;p__Gemmatimonadetes;c__BD2-11_terrestrial_group;o__uncultured_bacterium;f__<empty>;g__<empty>	0.000364804	0.000189863	0.000231299	0.00062964	0.000464963	0.000387093	0	0.000201461	0.000431908
k__Bacteria;p__Spirochaetes;c__Spirochaetia;o__Spirochaetales;f__Spirochaetaceae;g__	0.000279683	0.000226781	0.000416339	0.000748523	0.000646412	0.000180644	0	0	0.000390774
k__Bacteria;p__Proteobacteria;c__Deltaproteobacteria;o__Myxococcales;f__PS-B29;g__uncultured_delta_proteobacterium	0.000620166	0.000184589	0.000277559	0.000691283	0.000737137	0.000129031	0.000104838	0	0.000113119
k__Bacteria;p__Fibrobacteres;c__Fibrobacteria;o__Fibrobacterales;f__TG3;g__uncultured_bacterium	0.00113089	0.000427193	0.000442773	0.000162914	0.000351558	0	0.000321503	0	0
k__Archaea;p__Euryarchaeota;c__Thermoplasmata;o__SG8-5;f__uncultured_archaeon;g__<empty>	0.000364804	0.000142398	0.000469207	0.000779344	0.000782499	0	0	0	0.000267371
k__Bacteria;p__Planctomycetes;c__Planctomycetacia;o__Planctomycetales;f__Rubinisphaeraceae;g__Planctomicrobium	0.000668807	0.000253151	0.000376688	0.000308215	0.00019279	0	0.000132795	0.000176278	0.000688996
k__Bacteria;p__Chloroflexi;c__Dehalococcoidia;o__GIF9;f__AB-539-J10;g__uncultured_marine_bacterium	0.000425604	0.000274247	0.000403122	0.000281797	0.000272174	0	0.000251611	0.000453286	0.000421624
k__Bacteria;p__Poribacteria;c__uncultured_Firmicutes_bacterium;o__<empty>;f__<empty>;g__<empty>	0.000547206	0.000369179	0.000383296	0.000713298	0.00020413	0.000120429	0.000118816	0	0.000308505
k__Bacteria;p__WS1;c__uncultured_bacterium;o__<empty>;f__<empty>;g__<empty>	0.000814728	0	0	0.000268588	0.00130417	0.000352685	0	0	0
k__Bacteria;p__Actinobacteria;c__Thermoleophilia;o__Gaiellales;f__uncultured;g__uncultured_bacterium	0.000389124	0.000110754	0.000158605	0.000603221	0.00103199	0.000301073	0	0	0.000133686
k__Bacteria;p__Proteobacteria;c__Deltaproteobacteria;o__Desulfovibrionales;f__Desulfovibrionaceae;g__Halodesulfovibrio	0.000243202	0.000232055	0.000297385	0.000255378	0.000419601	0.000266664	0.000370427	0.000302191	0.000318789
k__Bacteria;p__Cyanobacteria;c__Oxyphotobacteria;o__Chloroplast;f__Chaetoceros_calcitrans;g__<empty>	0.000304003	0.000385001	0.000436165	0.000215751	0.000294855	0.000137633	0.00017473	0.000377739	0.000308505
k__Bacteria;p__Nitrospirae;c__Thermodesulfovibrionia;o__uncultured;f__uncultured_bacterium;g__<empty>	0.000705287	0.000337535	0.000330428	0.000268588	0.000498985	0	0	0	0.000473042
k__Bacteria;p__Proteobacteria;c__Alphaproteobacteria;o__Rickettsiales;f__Mitochondria;g__uncultured_bacterium	0.000401284	0.000632878	0.000515467	0.000123286	0	0.000120429	0.000244622	0	0.000575877
k__Bacteria;p__Fusobacteria;c__Fusobacteriia;o__Fusobacteriales;f__Fusobacteriaceae;g__Psychrilyobacter	0	0.000759454	0.000799635	0	0	0.000172042	0.000566125	0.000277008	0
k__Bacteria;p__Proteobacteria;c__Deltaproteobacteria;o__Myxococcales;f__VHS-B3-70;g__uncultured_bacterium	0.000194562	0.000432467	0.000522076	0.000479935	0.000317536	0	0	0	0.000596444
k__Archaea;p__Diapherotrites;c__Iainarchaeia;o__Iainarchaeales;f__Iainarchaeaceae;g__	0.000267523	0.000416645	0.000581553	0.000162914	0.000351558	0	0.000265589	0.000176278	0.000318789
k__Bacteria;p__Armatimonadetes;c__DG-56;o__uncultured_bacterium;f__<empty>;g__<empty>	0.000328323	0	0	0.00106114	0.000714456	0.000189246	0	0	0.000226237
k__Bacteria;p__Acetothermia;c__Acetothermiia;o__uncultured_organism;f__<empty>;g__<empty>	0.000644487	0.000137124	0	0.000590012	0.000782499	0.000163439	0	0	0.00017482
k__Bacteria;p__Patescibacteria;c__Gracilibacteria;o__uncultured_bacterium;f__<empty>;g__<empty>	0.000231042	0.000411371	0.000607987	0.000409486	0.000306195	0	0.000195697	0.00010073	0.000226237
k__Bacteria;p__Aerophobetes;c__uncultured_bacterium;o__<empty>;f__<empty>;g__	0.000328323	0.000279521	0.000284168	0.000136495	0.000306195	0	0.000230643	0.000151095	0.00076098
k__Bacteria;p__Bacteroidetes;c__Bacteroidia;o__Bacteroidales;f__Bacteroidetes_BD2-2;g__uncultured_Bacteroidetes_bacterium	0	0.000395549	0.000343645	0	0	0	0.000412362	0.000277008	0.00102835
k__Bacteria;p__Planctomycetes;c__Phycisphaerae;o__S-70;f__uncultured_bacterium;g__	0.000206722	0	0.000171822	0.00084539	0.00119076	0	0	0	0
k__Bacteria;p__Patescibacteria;c__Parcubacteria;o__uncultured_bacterium;f__<empty>;g__<empty>	0.000389124	0.000458837	0.00054851	0	0.000249493	0	0.0002586	0.000151095	0.000339356
k__Bacteria;p__Kiritimatiellaeota;c__Kiritimatiellae;o__WCHB1-41;f__uncultured_organism;g__<empty>	0.000741768	0.000121302	0.000416339	0.000431501	0.000351558	0	9.78487e-05	0	0.000226237
k__Bacteria;p__Chloroflexi;c__Anaerolineae;o__uncultured;f__uncultured_bacterium;g__<empty>	0.000340483	0.000179315	0	0.000334634	0.0012021	0.000326879	0	0	0
k__Bacteria;p__Chloroflexi;c__Dehalococcoidia;o__MSBL5;f__uncultured_Dehalococcoides_sp.;g__<empty>	0.000206722	0	0.000224691	0.000559191	0.000975289	0.0004129	0	0	0
k__Archaea;p__Euryarchaeota;c__Thermoplasmata;o__SG8-5;f__uncultured_Thermoplasmatales_archaeon;g__<empty>	0.000328323	0.000290069	0.00045599	0.000466726	0.000340217	0	0	0.000151095	0.000318789
k__Bacteria;p__TA06;c__uncultured_bacterium;o__<empty>;f__<empty>;g__<empty>	0.000449925	0.000137124	0.000350253	0.000607624	0.000464963	0	0	0	0.000339356
k__Bacteria;p__Proteobacteria;c__Deltaproteobacteria;o__Myxococcales;f__VHS-B3-70;g__uncultured_delta_proteobacterium	0.000449925	0.000421919	0.00040973	0.000334634	0.000374239	0	0.000181719	0	0.00017482
k__Bacteria;p__Planctomycetes;c__Phycisphaerae;o__CCM11a;f__;g__	0.000218882	0.000121302	0	0.000708895	0.00108869	0.000180644	0	0	0
k__Bacteria;p__Planctomycetes;c__Phycisphaerae;o__MSBL9;f__KCLunmb-38-53;g__	0.000304003	0.000374453	0.000376688	0.000206945	0.000260833	9.46228e-05	0.000202687	0	0.000473042
k__Bacteria;p__Chloroflexi;c__Dehalococcoidia;o__3051bac4-16;f__uncultured_bacterium;g__<empty>	0.000340483	0.000374453	0.000535293	0.000277394	0.000260833	0	0.000230643	0	0.000267371
k__Bacteria;p__Planctomycetes;c__SPG12-343-353-B69;o__uncultured_bacterium;f__<empty>;g__<empty>	0.000389124	0	0.000158605	0.00102592	0.000510326	0	0	0	0.000195387
k__Bacteria;p__Proteobacteria;c__Deltaproteobacteria;o__Sva0485;f__uncultured_delta_proteobacterium;g__<empty>	0.000437764	0.000506302	0.000429556	0.000365455	0.000317536	0	0.000216665	0	0
k__Bacteria;p__GN01;c__uncultured_bacterium;o__<empty>;f__<empty>;g__<empty>	0.000547206	0	0	0.000752926	0.000963948	0	0	0	0
k__Bacteria;p__Planctomycetes;c__Phycisphaerae;o__DG-20;f__uncultured_bacterium;g__	0.000109441	0	0	0.000598818	0.00111138	0.000223654	0	0	0.000195387
k__Bacteria;p__Bacteroidetes;c__Bacteroidia;o__Bacteroidales;f__Prolixibacteraceae;g__uncultured	0	0	0	0	0	0.000430104	0.000286557	0.000503651	0.000822681
k__Archaea;p__Nanoarchaeaeota;c__Woesearchaeia;o__metagenome;f__<empty>;g__	0.000474245	0.000300617	0.000323819	0.00017172	0.000294855	0	0.000181719	0.000151095	0.000133686
k__Bacteria;p__Actinobacteria;c__RBG-16-55-12;o__;f__;g__	0.000522885	0.000189863	0.000211474	0.00022896	0.00020413	0.000137633	9.78487e-05	0.00010073	0.000329073
k__Bacteria;p__Kiritimatiellaeota;c__Kiritimatiellae;o__WCHB1-41;f__uncultured_prokaryote;g__<empty>	0.000462085	0.000400823	0.000363471	0.000339037	0.000306195	0	0.000146773	0	0
k__Bacteria;p__Planctomycetes;c__Phycisphaerae;o__Pla1_lineage;f__uncultured_organism;g__<empty>	0.000291843	0	9.91283e-05	0.000796957	0.000827862	0	0	0	0
k__Bacteria;p__Spirochaetes;c__Leptospirae;o__Leptospirales;f__Leptospiraceae;g__RBG-16-49-21	0	0	0	0	0	0	0	0.000579199	0.00141913
k__Bacteria;p__Proteobacteria;c__Deltaproteobacteria;o__Desulfuromonadales;f__Geobacteraceae;g__Geobacter	0	0	0	0	0	0.000335481	0.000754833	0.000906573	0
k__Bacteria;p__Zixibacteria;c__uncultured_bacterium;o__<empty>;f__<empty>;g__	0.000401284	0.000168767	0.000218082	0.000532772	0.000453623	0	0	0	0.000215954
k__Bacteria;p__Planctomycetes;c__Phycisphaerae;o__DG-20;f__uncultured_organism;g__<empty>	0.000389124	0	0.000105737	0.00017172	0.000771159	0.00045591	0	0	9.25516e-05
k__Bacteria;p__Firmicutes;c__Clostridia;o__Clostridiales;f__Clostridiales_Incertae_Sedis;g__	0	0.00106534	0	0	0	0	0.000440319	0.000478469	0
k__Bacteria;p__Marinimicrobia_(SAR406_clade);c__uncultured_organism;o__<empty>;f__<empty>;g__	0.000109441	0.000242603	0.000337036	0.000264185	0.000226811	0	0.000328492	0.000226643	0.000246804
k__Bacteria;p__Chlamydiae;c__Chlamydiae;o__Chlamydiales;f__Simkaniaceae;g__	0.000571526	0.000406097	0.000376688	0.000110077	0.000113406	0	0	0.000151095	0.000246804
k__Bacteria;p__Planctomycetes;c__Phycisphaerae;o__MSBL9;f__ST-NAGAB-D1;g__	0.000218882	0	0.000105737	0.000563594	0.000737137	0.00020645	0	0	0.000123402
k__Bacteria;p__Chloroflexi;c__Anaerolineae;o__MSB-5B2;f__uncultured_bacterium;g__<empty>	0.000279683	0.00010548	0.000145388	0.000510757	0.000578369	0.000163439	0	0	0.000164536
k__Bacteria;p__Planctomycetes;c__Planctomycetacia;o__Pirellulales;f__Pirellulaceae;g__Bythopirellula	0.000547206	0	0.000224691	0.000550384	0.000283514	0.000146235	0	0	0.000164536
k__Archaea;p__Nanoarchaeaeota;c__Nanohaloarchaeia;o__Deep_Sea_Euryarchaeotic_Group(DSEG);f__uncultured_euryarchaeote;g__	0.000255363	0.000369179	0.000442773	0.000162914	0.000226811	0	0	0	0.000411341
k__Bacteria;p__Firmicutes;c__Bacilli;o__Bacillales;f__;g__	0.000693127	0	0	0.000317021	0.000453623	0.00020645	0	0	0.000195387
k__Bacteria;p__Calditrichaeota;c__Calditrichia;o__Calditrichales;f__Calditrichaceae;g__SM23-31	0.000583686	0.00049048	0.000356862	0	9.07245e-05	0	0	0	0.000329073
k__Bacteria;p__Proteobacteria;c__Gammaproteobacteria;o__Legionellales;f__Legionellaceae;g__uncultured	0.000741768	0.000337535	0.000158605	0.000255378	0.000113406	0	0.000111827	0.000125913	0
k__Bacteria;p__Acidobacteria;c__Subgroup_21;o__uncultured_bacterium;f__<empty>;g__<empty>	0.000231042	0.000142398	0	0.000453517	0.000544347	0.000275266	0	0	0.000185103
k__Bacteria;p__Poribacteria;c__uncultured_Firmicutes_bacterium;o__<empty>;f__<empty>;g__	0.000376964	0.000358631	0.000370079	0.000255378	0.00040826	0	0	0	0
k__Bacteria;p__Elusimicrobia;c__Elusimicrobia;o__MD2894-B20;f__uncultured_bacterium;g__	0.000304003	0.000400823	0.000310602	0.000220154	0	0	0.000202687	0.000125913	0.000185103
k__Bacteria;p__Cloacimonetes;c__Cloacimonadia;o__Cloacimonadales;f__NK-L14;g__uncultured_bacterium	0.000279683	0.000348083	0.000343645	0.000101271	0.000147427	0	0.00017473	0.000125913	0.000185103
k__Bacteria;p__Latescibacteria;c__uncultured_Latescibacteria_bacterium;o__<empty>;f__<empty>;g__	0.000267523	0	0.000105737	0.000488741	0.000669094	0	0	0	0.000164536
k__Bacteria;p__Cyanobacteria;c__Oxyphotobacteria;o__Chloroplast;f__Pavlova_lutheri;g__<empty>	0.000145921	0.000174041	0.000297385	0.00017172	0.000136087	0	0.000132795	0.000251826	0.000370207
k__Archaea;p__Euryarchaeota;c__Thermoplasmata;o__Methanomassiliicoccales;f__uncultured;g__uncultured_Thermoplasmatales_archaeon	0.000340483	0.000263699	0.000343645	0.00034344	0.000147427	0	0	0	0.000226237
k__Bacteria;p__Planctomycetes;c__Phycisphaerae;o__mle1-8;f__uncultured_bacterium;g__	0.000206722	0	0.000105737	0.000233363	0.000873224	0.000240858	0	0	0
k__Bacteria;p__Proteobacteria;c__Deltaproteobacteria;o__Desulfobacterales;f__Desulfobacteraceae;g__Desulfobacterium	0.000194562	0	0.000310602	0.000264185	0	0.000111827	0.000167741	0.000125913	0.000462758
k__Bacteria;p__Hydrogenedentes;c__Hydrogenedentia;o__Hydrogenedentiales;f__Hydrogenedensaceae;g__	0	0	0	0.000427098	0.0012021	0	0	0	0
k__Bacteria;p__Acidobacteria;c__Subgroup_22;o__uncultured_deep-sea_bacterium;f__<empty>;g__	0.000352644	0.000195137	0.000231299	0.000233363	0.000215471	0	0.000104838	0	0.000267371
k__Bacteria;p__Planctomycetes;c__vadinHA49;o__uncultured_bacterium;f__<empty>;g__	9.7281e-05	0	0	0.000545981	0.000759818	0.000103225	0	0	9.25516e-05
k__Bacteria;p__Proteobacteria;c__Deltaproteobacteria;o__Desulfobacterales;f__Desulfobacteraceae;g__Candidatus_Desulfamplus	0	0	0	0.000145301	0.000102065	0.000215052	0	0	0.00113119
k__Bacteria;p__Zixibacteria;c__;o__;f__;g__	0.000425604	0.000126576	0.000105737	0.000303812	0.000249493	0	0	0	0.00038049
k__Archaea;p__Euryarchaeota;c__Methanomicrobia;o__ANME-1;f__ANME-1b;g__uncultured_archaeon	0.000364804	0.000126576	0.00018504	0.000352246	0.000442282	0.000120429	0	0	0
k__Bacteria;p__Bacteroidetes;c__Ignavibacteria;o__Ignavibacteriales;f__Melioribacteraceae;g__IheB3-7	9.7281e-05	0	0.000469207	0	0	0	0	0.000402921	0.000617011
k__Bacteria;p__Chlamydiae;c__Chlamydiae;o__Chlamydiales;f__Simkaniaceae;g__Candidatus_Fritschea	0.000170242	0.000348083	0.000383296	0.000154108	0	0	0.0002586	0	0.000267371
k__Bacteria;p__Proteobacteria;c__Deltaproteobacteria;o__MBNT15;f__uncultured_delta_proteobacterium;g__<empty>	0.000401284	0.000137124	0.000178431	0.000162914	0.000544347	0	0	0	0.000143969
k__Bacteria;p__Firmicutes;c__Clostridia;o__Clostridiales;f__Clostridiaceae;g__Anaeromicrobium	0.000218882	0.000305891	0.000251125	0.000154108	0.000158768	0	0.000118816	0	0.00034964
k__Bacteria;p__Proteobacteria;c__Deltaproteobacteria;o__Desulfovibrionales;f__Desulfomicrobiaceae;g__	0	0	0	0	0	0.0004129	0.000587092	0.000554017	0
k__Archaea;p__Thaumarchaeota;c__Nitrososphaeria;o__Nitrososphaerales;f__Nitrososphaeraceae;g__uncultured_archaeon	0.000693127	0	0.000330428	0.000211348	0.000306195	0	0	0	0
k__Bacteria;p__BRC1;c__uncultured_organism;o__<empty>;f__<empty>;g__	0.000328323	0	0	0.000413889	0.00079384	0	0	0	0
k__Bacteria;p__Proteobacteria;c__Deltaproteobacteria;o__Desulfobacterales;f__Desulfobacteraceae;g__Desulfococcus	0.000413444	0	9.91283e-05	0.000299409	0	0	0	0	0.000709563
k__Bacteria;p__Patescibacteria;c__Parcubacteria;o__Candidatus_Yanofskybacteria;f__marine_sediment_metagenome;g__	0.000486405	0.000226781	0.000218082	0.000118883	0.000147427	0	0	0	0.000298222
k__Bacteria;p__Planctomycetes;c__Planctomycetacia;o__Planctomycetales;f__Rubinisphaeraceae;g__uncultured	0.000449925	0	0.000198257	0.000545981	0.000294855	0	0	0	0
k__Bacteria;p__Actinobacteria;c__WCHB1-81;o__uncultured_actinobacterium;f__<empty>;g__<empty>	0.000340483	0.000195137	0.000178431	0.000105674	0.000238152	0	0.000118816	0	0.000308505
k__Bacteria;p__Thermotogae;c__Thermotogae;o__Petrotogales;f__Petrotogaceae;g__SC103	0	0.000184589	0.000224691	0.000211348	0.000226811	0.000146235	0.000125806	0	0.000359923
k__Bacteria;p__Dependentiae;c__Babeliae;o__Babeliales;f__uncultured_bacterium;g__<empty>	0.000243202	0.000295343	0.000396513	0	0	0	0	0	0.000534743
k__Bacteria;p__Bacteroidetes;c__Bacteroidia;o__Cytophagales;f__Amoebophilaceae;g__Candidatus_Amoebophilus	0.000316163	0.000174041	0.000178431	0.000140898	0.000124746	0	0.000181719	0	0.000339356
k__Bacteria;p__Dependentiae;c__Babeliae;o__Babeliales;f__Vermiphilaceae;g__	0.000510725	0.000311165	0.00018504	0.000118883	0	0	0.000139784	0	0.000185103
k__Bacteria;p__Proteobacteria;c__Deltaproteobacteria;o__Oligoflexales;f__0319-6G20;g__	0.000218882	0.000274247	0.000270951	0.000136495	0.000102065	0	0.000188708	0	0.000257088
k__Bacteria;p__Kiritimatiellaeota;c__Kiritimatiellae;o__WCHB1-41;f__uncultured_bacterium;g__<empty>	0.000705287	0.000369179	0.000251125	0.00011448	0	0	0	0	0
k__Bacteria;p__Omnitrophicaeota;c__uncultured_organism;o__<empty>;f__<empty>;g__<empty>	0.000109441	0.000421919	0.000257734	9.68677e-05	0.000113406	0	0.000104838	0.00010073	0.000226237
k__Bacteria;p__Proteobacteria;c__Deltaproteobacteria;o__Desulfuromonadales;f__Geobacteraceae;g__	0.000218882	0	0.000251125	0.000264185	0.000136087	0	0.000335481	0.000201461	0
k__Bacteria;p__Planctomycetes;c__Pla3_lineage;o__uncultured_planctomycete;f__<empty>;g__<empty>	9.7281e-05	0	0	0.000528369	0.000759818	0	0	0	0
k__Bacteria;p__LCP-89;c__;o__;f__;g__	0.000364804	0.000163493	0.000145388	0	0.000102065	0	0	0.000176278	0.000421624
k__Bacteria;p__Fibrobacteres;c__Fibrobacteria;o__Fibrobacterales;f__TG3;g__uncultured_Chitinivibrionia_bacterium	0.000218882	0.000358631	0.000270951	9.24646e-05	0.000170109	0	0.000244622	0	0
k__Bacteria;p__Firmicutes;c__Erysipelotrichia;o__Erysipelotrichales;f__Erysipelotrichaceae;g__Turicibacter	0.000231042	0.000305891	0.000237908	0	0.000215471	0	0.000160751	0	0.000195387
k__Bacteria;p__Planctomycetes;c__Planctomycetacia;o__Planctomycetales;f__Gimesiaceae;g__uncultured	0.000243202	0	0	0.000449114	0.000283514	0	0	0	0.000370207
k__Bacteria;p__Poribacteria;c__uncultured_bacterium;o__<empty>;f__<empty>;g__	0.000389124	0	0.000171822	0.000510757	0.000113406	0	0	0	0.000143969
k__Archaea;p__Altiarchaeota;c__Altiarchaeia;o__uncultured_archaeon;f__<empty>;g__	0.000474245	0.000247877	0.000383296	0	0.000124746	0	9.78487e-05	0	0
k__Bacteria;p__Actinobacteria;c__Actinobacteria;o__PeM15;f__;g__	0.000291843	0.000137124	0.000178431	0.000277394	0.000215471	0	0	0	0.000226237
k__Bacteria;p__Gemmatimonadetes;c__MD2902-B12;o__uncultured_bacterium;f__<empty>;g__<empty>	0.000413444	0.000326987	0.000151997	0.000206945	0	0	0	0	0.000226237
k__Bacteria;p__Actinobacteria;c__Acidimicrobiia;o__Actinomarinales;f__uncultured;g__uncultured_bacterium	0.000133761	0.00010548	0.00013878	0.000312618	0.000487644	0	0	0	0.000143969
k__Bacteria;p__Planctomycetes;c__Phycisphaerae;o__Phycisphaerales;f__AKAU3564_sediment_group;g__uncultured_organism	8.51209e-05	0	0	0.000295006	0.000703115	0.000232256	0	0	0
k__Bacteria;p__Kiritimatiellaeota;c__Kiritimatiellae;o__WCHB1-41;f__uncultured_Verrucomicrobia_bacterium;g__<empty>	0.000304003	0.000179315	0.000125563	0.00022896	0.00020413	0	9.78487e-05	0	0.00017482
k__Bacteria;p__Omnitrophicaeota;c__Omnitrophia;o__Omnitrophales;f__Omnitrophaceae;g__Candidatus_Omnitrophus	0	0.000279521	0.000303994	0	0	0	0	0.000176278	0.000545026
k__Bacteria;p__Firmicutes;c__Bacilli;o__Bacillales;f__Bacillaceae;g__Aeribacillus	0	0.000121302	0.000125563	0	0.000238152	0	0	0	0.000812398
k__Bacteria;p__Bacteroidetes;c__Bacteroidia;o__Chitinophagales;f__Chitinophagaceae;g__Hydrotalea	0	0	0	0	0	0	0.000167741	0.000528834	0.000596444
k__Bacteria;p__Tenericutes;c__Mollicutes;o__Izimaplasmatales;f__Izimaplasmataceae;g__bacterium_enrichment_culture_clone_R4-81B	0	0.000189863	0.000171822	0	0	0.000163439	0.000328492	0.000176278	0.000246804
k__Bacteria;p__Proteobacteria;c__Deltaproteobacteria;o__Desulfovibrionales;f__Desulfovibrionaceae;g__	0.000255363	0	0	0.000317021	0.000249493	0.000335481	0.000111827	0	0
k__Bacteria;p__Bacteroidetes;c__Bacteroidia;o__Chitinophagales;f__Saprospiraceae;g__Lewinella	0.000340483	0.000226781	0.000211474	0.000167317	0.000113406	0	0	0	0.000185103
k__Bacteria;p__Actinobacteria;c__Actinobacteria;o__Micrococcales;f__Micrococcaceae;g__	0.000145921	0.000163493	9.91283e-05	0	0	0	0	0	0.000832965
k__Archaea;p__Thaumarchaeota;c__Nitrososphaeria;o__Nitrososphaerales;f__Nitrososphaeraceae;g__	0.000267523	0	0	0.000369858	0.000487644	0.000111827	0	0	0
k__Bacteria;p__Acidobacteria;c__Subgroup_17;o__uncultured_Acidobacteria_bacterium;f__<empty>;g__	0.000109441	0	0	0.000356649	0.000544347	0.000223654	0	0	0
k__Bacteria;p__Patescibacteria;c__WWE3;o__uncultured_bacterium;f__<empty>;g__	0.000291843	0.00010548	0.000151997	8.80615e-05	0	0	0.000104838	0.000226643	0.000257088
k__Bacteria;p__Bacteroidetes;c__Bacteroidia;o__Bacteroidales;f__Marinilabiliaceae;g__uncultured	0	0	0	0	0.000170109	0.000137633	0.000321503	0.000377739	0.000185103
k__Archaea;p__Euryarchaeota;c__Thermoplasmata;o__SG8-5;f__uncultured_euryarchaeote;g__<empty>	0.000121601	0	0.000178431	0.000268588	0.000362898	0	0	0	0.000215954
k__Bacteria;p__Firmicutes;c__Clostridia;o__Clostridiales;f__livecontrolB21;g__uncultured_bacterium	0	0.000205685	0.000151997	0	0	0.00024946	0.000328492	0.000201461	0
k__Bacteria;p__Chloroflexi;c__;o__;f__;g__	0.000352644	0.000142398	0	0.000242169	0.00020413	0.000129031	0	0	0
k__Bacteria;p__Proteobacteria;c__Alphaproteobacteria;o__Paracaedibacterales;f__Paracaedibacteraceae;g__uncultured	0.000449925	0.000100206	0.000112345	0.000101271	0.000113406	0	0	0	0.000185103
k__Bacteria;p__Chlamydiae;c__LD1-PA32;o__uncultured_bacterium;f__<empty>;g__<empty>	8.51209e-05	0	0.000350253	0.000158511	0.000328876	0.000120429	0	0	0
k__Bacteria;p__FCPU426;c__uncultured_bacterium;o__<empty>;f__<empty>;g__	0.000145921	0.000168767	0.000125563	0	0	0	0	0.00010073	0.000493609
k__Archaea;p__Hadesarchaeaeota;c__uncultured_archaeon;o__<empty>;f__<empty>;g__<empty>	0.000121601	0	0	0.000189332	0.000567028	0.000154837	0	0	0
k__Bacteria;p__Firmicutes;c__Bacilli;o__Bacillales;f__Bacillaceae;g__Oceanobacillus	0	0.000137124	0.00013878	0	0	0	0	0	0.000740413
k__Bacteria;p__Chloroflexi;c__Dehalococcoidia;o__GIF9;f__uncultured_bacterium;g__	0.000814728	0	0	0	0	0	0	0.000201461	0
k__Bacteria;p__Bacteroidetes;c__Bacteroidia;o__;f__;g__	0.000158082	0	0.000204865	0.00022896	0.00019279	0	0	0	0.000226237
k__Archaea;p__Crenarchaeota;c__Bathyarchaeia;o__;f__;g__	0.000170242	0.000100206	0.000118954	0.000290603	0.000328876	0	0	0	0
k__Bacteria;p__Kiritimatiellaeota;c__Kiritimatiellae;o__WCHB1-41;f__uncultured_Kiritimatiellaeota_bacterium;g__<empty>	0.000316163	0.000216233	0.00018504	0.000127689	0	0	0	0	0.000143969
k__Bacteria;p__WS2;c__uncultured_microorganism;o__<empty>;f__<empty>;g__	0.000304003	0	0	0.000242169	0.000226811	0	0	0	0.000215954
k__Bacteria;p__Marinimicrobia_(SAR406_clade);c__uncultured_organism;o__<empty>;f__<empty>;g__<empty>	0.000133761	0.000263699	0.000237908	0	0.000147427	0	0.000195697	0	0
k__Bacteria;p__Proteobacteria;c__Gammaproteobacteria;o__Betaproteobacteriales;f__Burkholderiaceae;g__Ralstonia	0	0.000263699	0.000297385	0.000158511	0	0	0	0	0.000257088
k__Bacteria;p__Chloroflexi;c__JG30-KF-CM66;o__uncultured_bacterium;f__<empty>;g__<empty>	0	0	0	0.000250975	0.000567028	0.000137633	0	0	0
k__Bacteria;p__Elusimicrobia;c__Lineage_IIa;o__uncultured_bacterium;f__<empty>;g__	0.000218882	0.000168767	0.000218082	0	0.000158768	0	0.000160751	0	0
k__Archaea;p__Nanoarchaeaeota;c__Woesearchaeia;o__Candidatus_Diapherotrites_archaeon_ADurb.Bin253;f__<empty>;g__	0.000231042	0.000126576	0.000422948	0.000132092	0	0	0	0	0
k__Bacteria;p__Proteobacteria;c__Deltaproteobacteria;o__Myxococcales;f__PS-B29;g__	0.000158082	0.000110754	0.000224691	0.000162914	0.000136087	0	9.78487e-05	0	0
k__Bacteria;p__Poribacteria;c__;o__;f__;g__	0.000109441	0	0.00013878	0.000396277	0.000113406	0	0	0	0.000113119
k__Bacteria;p__WS2;c__uncultured_organism;o__<empty>;f__<empty>;g__	0.000121601	0	0	0.000308215	0.000272174	0.000163439	0	0	0
k__Bacteria;p__Proteobacteria;c__Deltaproteobacteria;o__Sva0485;f__uncultured_Desulfobulbaceae_bacterium;g__<empty>	0.000158082	0	0.00013878	0.000242169	0.000158768	0	0	0	0.000154253
k__Bacteria;p__Cyanobacteria;c__Oxyphotobacteria;o__Chloroplast;f__Ochromonas_sp._CCMP1393;g__<empty>	0.000121601	0.00015822	0.00013878	0.000140898	0.000136087	0	0.000153762	0	0
k__Bacteria;p__Actinobacteria;c__Thermoleophilia;o__Solirubrobacterales;f__67-14;g__uncultured_bacterium	0.000121601	0.000210959	0.000165214	0.000136495	0.00020413	0	0	0	0
k__Bacteria;p__Proteobacteria;c__Deltaproteobacteria;o__Desulfuromonadales;f__C8S-102;g__uncultured_bacterium	0	0	0	0	0	0	0.000636017	0.000201461	0
k__Bacteria;p__Verrucomicrobia;c__Verrucomicrobiae;o__Verrucomicrobiales;f__DEV007;g__uncultured_Verrucomicrobia_bacterium	0.000121601	0.000152946	0.000112345	0.000145301	0	0	0	0	0.000298222
k__Bacteria;p__Proteobacteria;c__Deltaproteobacteria;o__Desulfobacterales;f__Desulfobulbaceae;g__uncultured	0	0	0	0	0	0.000163439	0	0	0.000658145
k__Bacteria;p__Actinobacteria;c__Actinobacteria;o__Corynebacteriales;f__Mycobacteriaceae;g__Mycobacterium	0.000133761	0	0	0.000317021	0.000215471	0.000137633	0	0	0
k__Bacteria;p__Acidobacteria;c__Subgroup_22;o__uncultured_bacterium;f__<empty>;g__	0.000133761	0.00013185	0	0.000308215	0.000226811	0	0	0	0
k__Bacteria;p__Planctomycetes;c__Phycisphaerae;o__DG-20;f__Planctomycetes_bacterium_DG_20;g__<empty>	0.000206722	0	0	0	0.000317536	0.000180644	0	0	9.25516e-05
k__Bacteria;p__Atribacteria;c__JS1;o__uncultured_bacterium;f__<empty>;g__	0.000510725	0	0	0	0	0.000137633	0.000146773	0	0
k__Bacteria;p__Patescibacteria;c__ABY1;o__Candidatus_Falkowbacteria;f__Candidatus_Falkowbacteria_bacterium_GW2011_GWA2_41_14;g__	0.000194562	0.000152946	0.000171822	9.24646e-05	0.000181449	0	0	0	0
k__Bacteria;p__Firmicutes;c__Negativicutes;o__Selenomonadales;f__Veillonellaceae;g__Sporomusa	0	0.000374453	0.000145388	0.000158511	0	0	0	0	0.000113119
k__Archaea;p__Diapherotrites;c__Micrarchaeia;o__;f__;g__	0.000267523	0	0	0.000339037	0.000181449	0	0	0	0
k__Bacteria;p__Proteobacteria;c__Deltaproteobacteria;o__NB1-j;f__;g__	0	0	0	0.000193735	0.00040826	0.000180644	0	0	0
k__Bacteria;p__Bacteroidetes;c__Bacteroidia;o__Flavobacteriales;f__Flavobacteriaceae;g__Lutimonas	0.000145921	0.000184589	0	0	0	0	0	0.000251826	0.000195387
k__Bacteria;p__Bacteroidetes;c__Bacteroidia;o__Flavobacteriales;f__Flavobacteriaceae;g__Lutibacter	0.000145921	0.000142398	0.000158605	0.000149705	0	0	0	0	0.00017482
k__Bacteria;p__Chloroflexi;c__Dehalococcoidia;o__SAR202_clade;f__;g__	0.000109441	0	0	0.000312618	0.000340217	0	0	0	0
k__Archaea;p__Nanoarchaeaeota;c__Nanohaloarchaeia;o__Deep_Sea_Euryarchaeotic_Group(DSEG);f__uncultured_archaeon;g__<empty>	0.000158082	0	0.000105737	0.000145301	0.000226811	0	0	0	0.000113119
k__Bacteria;p__Patescibacteria;c__Microgenomatia;o__Candidatus_Beckwithbacteria;f__metagenome;g__<empty>	0.000158082	0.000205685	0	0	0	0	0	0.000125913	0.000246804
k__Bacteria;p__Dependentiae;c__Babeliae;o__Babeliales;f__UBA12411;g__	0.000194562	0.000110754	0.000132171	0	0	0	0	0	0.000298222
k__Bacteria;p__TA06;c__;o__;f__;g__	0.000243202	0	0	0.000272991	0.000215471	0	0	0	0
k__Bacteria;p__Bacteroidetes;c__Bacteroidia;o__Bacteroidales;f__Marinilabiliaceae;g__	0	0	0	0	0	0	0	0	0.00073013
k__Bacteria;p__Planctomycetes;c__Phycisphaerae;o__Phycisphaerales;f__AKAU3564_sediment_group;g__uncultured_planctomycete	0	0	0	0.000369858	0.000351558	0	0	0	0
k__Bacteria;p__Planctomycetes;c__Planctomycetacia;o__Pirellulales;f__Pirellulaceae;g__Rubripirellula	0.000267523	0	0	0	0.000158768	0	0	0	0.000246804
k__Bacteria;p__Chloroflexi;c__Dehalococcoidia;o__SPG12-343-353-B75;f__uncultured_bacterium;g__	0	0.000152946	0.000171822	0.000184929	0.000158768	0	0	0	0
k__Bacteria;p__Planctomycetes;c__Phycisphaerae;o__Phycisphaerales;f__Phycisphaeraceae;g__FS140-16B-02_marine_group	0.000158082	0	0	0.000206945	0.000147427	0	0	0	0.000154253
k__Bacteria;p__BRC1;c__;o__;f__;g__	0	0	0	0.000321424	0.000340217	0	0	0	0
k__Bacteria;p__Patescibacteria;c__ABY1;o__Candidatus_Kerfeldbacteria;f__uncultured_organism;g__	0.000109441	0.000121302	0	0	0	0	0.000118816	0.000125913	0.000185103
k__Bacteria;p__Cyanobacteria;c__Oxyphotobacteria;o__Nostocales;f__Microcystaceae;g__Atelocyanobacterium_(UCYN-A)	0.000413444	0.000152946	0	0	9.07245e-05	0	0	0	0
k__Bacteria;p__Planctomycetes;c__Pla4_lineage;o__uncultured_bacterium;f__<empty>;g__<empty>	0	0	0.000118954	0.000145301	0.000385579	0	0	0	0
k__Bacteria;p__Planctomycetes;c__Planctomycetacia;o__Planctomycetales;f__uncultured;g__uncultured_bacterium	0.000231042	0	0	0.000123286	0.000113406	0	0	0	0.00017482
k__Bacteria;p__Proteobacteria;c__Deltaproteobacteria;o__Desulfuromonadales;f__Desulfuromonadaceae;g__Desulfuromusa	0	0.000152946	0	0	0	0.000146235	0.000132795	0	0.00020567
k__Bacteria;p__Planctomycetes;c__ODP123;o__uncultured_planctomycete;f__<empty>;g__	0	0	0.000105737	0.000233363	0.000283514	0	0	0	0
k__Bacteria;p__BRC1;c__uncultured_delta_proteobacterium;o__<empty>;f__<empty>;g__	0.000231042	0	0	0.000140898	0.000238152	0	0	0	0
k__Bacteria;p__Proteobacteria;c__Gammaproteobacteria;o__Diplorickettsiales;f__Diplorickettsiaceae;g__	0.000158082	0.000189863	9.91283e-05	0	0.000158768	0	0	0	0
k__Bacteria;p__Planctomycetes;c__Brocadiae;o__SM23-32;f__Planctomycetes_bacterium_SM23_32;g__	0	0	0	0.000250975	0.000351558	0	0	0	0
k__Bacteria;p__Proteobacteria;c__Deltaproteobacteria;o__Desulfobacterales;f__Desulfobacteraceae;g__Desulfobacter	0	0	0	0	0	0.000361287	0.000139784	0.00010073	0
k__Bacteria;p__Chloroflexi;c__Anaerolineae;o__uncultured;f__uncultured_bacterium;g__	0.000194562	0	0.000112345	0.000123286	0.000170109	0	0	0	0
k__Bacteria;p__Bacteroidetes;c__Bacteroidia;o__Sphingobacteriales;f__Lentimicrobiaceae;g__uncultured_Bacteroidetes_bacterium	0.000145921	0	0.000257734	0	0	0	0	0	0.000195387
k__Bacteria;p__Chloroflexi;c__Anaerolineae;o__SBR1031;f__uncultured_bacterium;g__	0	0	0	0.000118883	0.000476304	0	0	0	0
k__Archaea;p__Thaumarchaeota;c__Nitrososphaeria;o__Nitrososphaerales;f__Nitrososphaeraceae;g__Candidatus_Nitrososphaera	0.000279683	0	0	0.000312618	0	0	0	0	0
k__Bacteria;p__Proteobacteria;c__Deltaproteobacteria;o__Desulfarculales;f__Desulfarculaceae;g__	0	0	0	0.00022896	0.00020413	0	0	0	0.000154253
k__Bacteria;p__Proteobacteria;c__Deltaproteobacteria;o__NKB15;f__uncultured_bacterium;g__<empty>	0.000109441	0	0	0.000154108	0.000317536	0	0	0	0
k__Bacteria;p__Planctomycetes;c__Pla3_lineage;o__uncultured_bacterium;f__<empty>;g__	0.000145921	0	0	0.000211348	0.000215471	0	0	0	0
k__Bacteria;p__Patescibacteria;c__Berkelbacteria;o__uncultured_bacterium;f__<empty>;g__	0	0.00013185	0.000125563	0.000105674	0	0	0	0	0.000195387
k__Archaea;p__Diapherotrites;c__Micrarchaeia;o__uncultured_archaeon;f__<empty>;g__	0.000133761	0	0	0.000140898	0.000283514	0	0	0	0
k__Bacteria;p__Proteobacteria;c__Gammaproteobacteria;o__Alteromonadales;f__Idiomarinaceae;g__Idiomarina	0	0.000126576	0.000105737	0	0	0	0	0	0.000318789
k__Bacteria;p__Chloroflexi;c__Dehalococcoidia;o__MSBL5;f__uncultured_organism;g__<empty>	0	0	0	0.000184929	0.000362898	0	0	0	0
k__Bacteria;p__PAUC34f;c__uncultured_bacterium;o__<empty>;f__<empty>;g__	0.000231042	0	0	0.000202541	0.000113406	0	0	0	0
k__Bacteria;p__Zixibacteria;c__uncultured_delta_proteobacterium;o__<empty>;f__<empty>;g__<empty>	0.000133761	0	0	0.000140898	0.000272174	0	0	0	0
k__Bacteria;p__Proteobacteria;c__Deltaproteobacteria;o__;f__;g__	0	0.000137124	0	0	9.07245e-05	0.000137633	0.00017473	0	0
k__Bacteria;p__Proteobacteria;c__Deltaproteobacteria;o__Myxococcales;f__MidBa8;g__uncultured_organism	0.000535045	0	0	0	0	0	0	0	0
k__Bacteria;p__Fibrobacteres;c__Fibrobacteria;o__Fibrobacterales;f__TG3;g__	0.000291843	0	0.00013878	0.000101271	0	0	0	0	0
k__Bacteria;p__Actinobacteria;c__Actinobacteria;o__PeM15;f__uncultured_actinobacterium;g__<empty>	0.000170242	0	0	0	0.000124746	0	0	0	0.000236521
k__Bacteria;p__Chloroflexi;c__Dehalococcoidia;o__MB-C2-126;f__uncultured_bacterium;g__<empty>	0	0.000110754	0	0.000101271	0	0	0	0	0.000318789
k__Bacteria;p__Planctomycetes;c__Planctomycetacia;o__uncultured;f__uncultured_bacterium;g__	0	0	0	0	0.000385579	0.000137633	0	0	0
k__Bacteria;p__Proteobacteria;c__Alphaproteobacteria;o__Rhizobiales;f__Rhizobiaceae;g__Mesorhizobium	0.000145921	0	8.59112e-05	0.000101271	9.07245e-05	0	0	0	9.25516e-05
k__Bacteria;p__Planctomycetes;c__Pla3_lineage;o__uncultured_planctomycete;f__<empty>;g__	0	0	0	0.000118883	0.00039692	0	0	0	0
k__Bacteria;p__Patescibacteria;c__Parcubacteria;o__GWA2-38-13b;f__uncultured_bacterium;g__	0.000145921	0.000137124	0.000118954	0	0	0	0	0	0.000102835
k__Bacteria;p__Firmicutes;c__Clostridia;o__Clostridiales;f__JTB215;g__bacterium_enrichment_culture_clone_AOM-SR-B4	0	0	0	0	0	0.000180644	0.000139784	0.000176278	0
k__Archaea;p__Nanoarchaeaeota;c__Nanohaloarchaeia;o__Deep_Sea_Euryarchaeotic_Group(DSEG);f__uncultured_archaeon;g__	0.000121601	8.96577e-05	9.25198e-05	0	0.000102065	0	9.08595e-05	0	0
k__Bacteria;p__Proteobacteria;c__Deltaproteobacteria;o__Desulfobacterales;f__Desulfobacteraceae;g__Desulfatibacillum	0	0	0	0	0	0.000326879	0	0	0.000154253
k__Bacteria;p__Proteobacteria;c__Deltaproteobacteria;o__MBNT15;f__uncultured_organism;g__	0.000121601	0	0	0.000149705	0.000113406	0	0	0	9.25516e-05
k__Bacteria;p__Schekmanbacteria;c__uncultured_bacterium;o__<empty>;f__<empty>;g__<empty>	0.000121601	0	0	0.000224557	0.000124746	0	0	0	0
k__Archaea;p__Euryarchaeota;c__Methanomicrobia;o__Methanosarcinales;f__Methermicoccaceae;g__uncultured_archaeon	9.7281e-05	0	0	0.000242169	0.000124746	0	0	0	0
k__Bacteria;p__Chloroflexi;c__Anaerolineae;o__uncultured;f__uncultured_sediment_bacterium;g__<empty>	0.000158082	0	0	0.000140898	0	0	0	0	0.000164536
k__Bacteria;p__Proteobacteria;c__Alphaproteobacteria;o__Rickettsiales;f__Mitochondria;g__	0	0	0	0.000233363	0	0	0	0	0.000226237
k__Bacteria;p__Omnitrophicaeota;c__Omnitrophia;o__uncultured_bacterium;f__<empty>;g__	0	0	0	0.000167317	0.000113406	0	0	0	0.00017482
k__Bacteria;p__Proteobacteria;c__Alphaproteobacteria;o__Rhizobiales;f__Xanthobacteraceae;g__Afipia	0	0	0	0	0	0	0	0.000176278	0.000277655
k__Bacteria;p__Actinobacteria;c__Actinobacteria;o__Frankiales;f__Geodermatophilaceae;g__Blastococcus	0.000133761	0	0	0.000140898	0.000170109	0	0	0	0
k__Bacteria;p__Verrucomicrobia;c__Verrucomicrobiae;o__Chthoniobacterales;f__Chthoniobacteraceae;g__LD29	0.000267523	0	0	0	0	0	0	0	0.00017482
k__Bacteria;p__BRC1;c__uncultured_candidate_division_BRC1_bacterium;o__<empty>;f__<empty>;g__<empty>	0	0	0	0.000184929	0.000249493	0	0	0	0
k__Bacteria;p__Zixibacteria;c__uncultured_Caldithrix_sp.;o__<empty>;f__<empty>;g__<empty>	0.000231042	0.000200411	0	0	0	0	0	0	0
k__Bacteria;p__Proteobacteria;c__Gammaproteobacteria;o__Coxiellales;f__Coxiellaceae;g__Coxiella	0	0	0	0	0	0	0	0	0.000421624
k__Bacteria;p__Patescibacteria;c__ABY1;o__Candidatus_Falkowbacteria;f__uncultured_bacterium;g__	8.51209e-05	0	0.000118954	0.000110077	0.000102065	0	0	0	0
k__Bacteria;p__Verrucomicrobia;c__Verrucomicrobiae;o__Opitutales;f__Puniceicoccaceae;g__Lentimonas	0.000121601	0.000116028	0.000178431	0	0	0	0	0	0
k__Bacteria;p__uncultured;c__uncultured_bacterium;o__<empty>;f__<empty>;g__	0	0	0.000218082	0	0	0	0	0	0.000195387
k__Bacteria;p__Planctomycetes;c__ODP123;o__uncultured_organism;f__<empty>;g__	0.000109441	0	0	0.000154108	0.000147427	0	0	0	0
k__Bacteria;p__Bacteroidetes;c__Bacteroidia;o__Chitinophagales;f__Saprospiraceae;g__uncultured	9.7281e-05	8.96577e-05	9.91283e-05	0	0	0	0	0	0.000123402
k__Bacteria;p__Chloroflexi;c__Dehalococcoidia;o__Sh765B-AG-111;f__;g__	0	0	0.000158605	0.000158511	9.07245e-05	0	0	0	0
k__Bacteria;p__Schekmanbacteria;c__uncultured_bacterium;o__<empty>;f__<empty>;g__	0	0	0	0	0.000170109	0	0	0	0.000236521
k__Bacteria;p__Patescibacteria;c__Gracilibacteria;o__uncultured_Microgenomates_group_bacterium;f__<empty>;g__<empty>	0	0.000116028	0.000112345	0	0	0	0	0	0.00017482
k__Bacteria;p__Proteobacteria;c__Deltaproteobacteria;o__FW113;f__uncultured_organism;g__<empty>	0.000182402	0	0.000105737	0.00011448	0	0	0	0	0
k__Bacteria;p__Proteobacteria;c__Gammaproteobacteria;o__Betaproteobacteriales;f__Burkholderiaceae;g__Undibacterium	0	0	0.000118954	0	0	0	0	0	0.000277655
k__Bacteria;p__Planctomycetes;c__Phycisphaerae;o__S-70;f__uncultured_bacterium;g__<empty>	0	0	0	0.000180526	0.000215471	0	0	0	0
k__Bacteria;p__Proteobacteria;c__Gammaproteobacteria;o__Alteromonadales;f__Idiomarinaceae;g__Aliidiomarina	0	0.000116028	0	0	0	0	0	0	0.000277655
k__Bacteria;p__Chloroflexi;c__Anaerolineae;o__Anaerolineales;f__Anaerolineaceae;g__GWD2-49-16	0.000133761	0	0	0	0.000136087	0	0	0	0.000123402
k__Bacteria;p__Planctomycetes;c__Phycisphaerae;o__MSBL9;f__SG8-4;g__uncultured_planctomycete	0	0	0	0.000198138	0.00019279	0	0	0	0
k__Bacteria;p__Chloroflexi;c__Anaerolineae;o__Caldilineales;f__Caldilineaceae;g__uncultured	0	0	0	0.000206945	0.000181449	0	0	0	0
k__Bacteria;p__Planctomycetes;c__Phycisphaerae;o__Amsterdam-1B-07;f__uncultured_bacterium;g__	0.000145921	0	0	0	0.000113406	0	0	0	0.000123402
k__Bacteria;p__Lentisphaerae;c__Lentisphaeria;o__Victivallales;f__PRD18C08;g__uncultured_Lentisphaerae_bacterium	0	0	0.000211474	0	0	0	0	0	0.000164536
k__Bacteria;p__Chloroflexi;c__Anaerolineae;o__SBR1031;f__;g__	0	0	0	0.000250975	0.000113406	0	0	0	0
k__Bacteria;p__Margulisbacteria;c__uncultured_organism;o__<empty>;f__<empty>;g__	9.7281e-05	0	0	0	0	0	0	0	0.000257088
k__Bacteria;p__Proteobacteria;c__Alphaproteobacteria;o__Rickettsiales;f__Mitochondria;g__metagenome	0	0.000110754	0.00013878	0	0	0	0	0.00010073	0
k__Bacteria;p__Patescibacteria;c__Microgenomatia;o__;f__;g__	0	0.00013185	0.000112345	0	0	0	0	0	0.000102835
k__Bacteria;p__Firmicutes;c__Clostridia;o__Clostridiales;f__Ruminococcaceae;g__GCA-900066225	0	0.000126576	0.000118954	0	0	0	0	0.00010073	0
k__Bacteria;p__WOR-1;c__uncultured_prokaryote;o__<empty>;f__<empty>;g__<empty>	0	0.000189863	0	0	0	0	0	0	0.000154253
k__Bacteria;p__Patescibacteria;c__Gracilibacteria;o__Absconditabacteriales_(SR1);f__uncultured_organism;g__	9.7281e-05	0	0.000112345	0.000132092	0	0	0	0	0
k__Archaea;p__Diapherotrites;c__Micrarchaeia;o__uncultured_archaeon;f__<empty>;g__<empty>	0.000109441	0.00010548	0	0	0.000124746	0	0	0	0
k__Bacteria;p__Chloroflexi;c__Dehalococcoidia;o__FW22;f__uncultured_bacterium;g__	0	0.000216233	0	0	0	0	0	0	0.000123402
k__Bacteria;p__Bacteroidetes;c__Bacteroidia;o__Sphingobacteriales;f__Lentimicrobiaceae;g__	0.000133761	0.000205685	0	0	0	0	0	0	0
k__Bacteria;p__Firmicutes;c__Clostridia;o__Clostridiales;f__Peptostreptococcaceae;g__Romboutsia	0.000182402	0.000152946	0	0	0	0	0	0	0
k__Bacteria;p__Acidobacteria;c__Aminicenantia;o__Aminicenantales;f__uncultured_organism;g__<empty>	0	0.000216233	0.000118954	0	0	0	0	0	0
k__Bacteria;p__Kiritimatiellaeota;c__Kiritimatiellae;o__Kiritimatiellales;f__Kiritimatiellaceae;g__MSBL3	0	0	0	0	0	0	0	0	0.000329073
k__Bacteria;p__Dependentiae;c__Babeliae;o__Babeliales;f__UBA12409;g__	0.000158082	0	0	0.000158511	0	0	0	0	0
k__Bacteria;p__Omnitrophicaeota;c__uncultured_Omnitrophica_bacterium;o__<empty>;f__<empty>;g__	0	0	0.000158605	0	0	0	0	0	0.000154253
k__Bacteria;p__Verrucomicrobia;c__Verrucomicrobiae;o__Verrucomicrobiales;f__Rubritaleaceae;g__Persicirhabdus	0.000121601	0.000184589	0	0	0	0	0	0	0
k__Bacteria;p__Acidobacteria;c__Aminicenantia;o__Aminicenantales;f__uncultured_Aminicenantes_bacterium;g__	0.000304003	0	0	0	0	0	0	0	0
k__Bacteria;p__Planctomycetes;c__Phycisphaerae;o__CCM11a;f__uncultured_bacterium;g__	0.000133761	0	0	0	0.000170109	0	0	0	0
k__Bacteria;p__LCP-89;c__uncultured_Deferribacteres_bacterium;o__<empty>;f__<empty>;g__	0.000182402	0	0	0.000118883	0	0	0	0	0
k__Bacteria;p__Firmicutes;c__Clostridia;o__Clostridiales;f__Clostridiaceae_1;g__Clostridium_sensu_stricto_1	0	0	9.91283e-05	0	0	0	0	0	0.000195387
k__Bacteria;p__Lentisphaerae;c__Oligosphaeria;o__SS1-B-02-17;f__uncultured_bacterium;g__<empty>	0	0	0	0	0.000283514	0	0	0	0
k__Bacteria;p__Chloroflexi;c__Dehalococcoidia;o__FS117-23B-02;f__;g__	0	0	0	0.000158511	0.000124746	0	0	0	0
k__Bacteria;p__Planctomycetes;c__Phycisphaerae;o__Phycisphaerales;f__Phycisphaeraceae;g__uncultured	0	0	0	0.000158511	0.000124746	0	0	0	0
k__Bacteria;p__Acidobacteria;c__Acidobacteriia;o__Solibacterales;f__Solibacteraceae_(Subgroup_3);g__PAUC26f	0.000109441	0	0.000171822	0	0	0	0	0	0
k__Bacteria;p__Epsilonbacteraeota;c__Campylobacteria;o__Campylobacterales;f__;g__	0	0	0	0	0	0	0	0.000277008	0
k__Bacteria;p__Chloroflexi;c__Anaerolineae;o__Ardenticatenales;f__uncultured;g__	0	0	0	0.000140898	0.000136087	0	0	0	0
k__Bacteria;p__Proteobacteria;c__Alphaproteobacteria;o__Rickettsiales;f__Mitochondria;g__Equisetum_arvense_(field_horsetail)	0	0	0	0.000272991	0	0	0	0	0
k__Bacteria;p__Planctomycetes;c__Pla4_lineage;o__uncultured_organism;f__<empty>;g__	0.000158082	0	0	0	0	0	0	0	0.000113119
k__Bacteria;p__Proteobacteria;c__Deltaproteobacteria;o__Myxococcales;f__Polyangiaceae;g__Chondromyces	0	0	0	9.68677e-05	0.000170109	0	0	0	0
k__Bacteria;p__Acidobacteria;c__Aminicenantia;o__Aminicenantales;f__;g__	0	0.000110754	0	0	0	0	0	0	0.000154253
k__Bacteria;p__CK-2C2-2;c__uncultured_bacterium;o__<empty>;f__<empty>;g__	0	0	0	0.000105674	0.000158768	0	0	0	0
k__Bacteria;p__Bacteroidetes;c__Bacteroidia;o__Bacteroidales;f__Marinilabiliaceae;g__Labilibacter	0	0	0.000145388	0.00011448	0	0	0	0	0
k__Bacteria;p__Bacteroidetes;c__Bacteroidia;o__Chitinophagales;f__Saprospiraceae;g__Phaeodactylibacter	0	0	0	0	0	0	0	0	0.000257088
k__Bacteria;p__Planctomycetes;c__Phycisphaerae;o__Phycisphaerales;f__AKAU3564_sediment_group;g__marine_sediment_metagenome	0	0	0	0.000132092	0.000124746	0	0	0	0
k__Bacteria;p__Acetothermia;c__Acetothermiia;o__bacterium_enrichment_culture_clone_AOM-SR-B22;f__<empty>;g__<empty>	0	0	0	0.000255378	0	0	0	0	0
k__Bacteria;p__Acidobacteria;c__Acidobacteriia;o__Solibacterales;f__Solibacteraceae_(Subgroup_3);g__uncultured_Acidobacterium_sp.	0.000255363	0	0	0	0	0	0	0	0
k__Bacteria;p__Patescibacteria;c__Parcubacteria;o__Candidatus_Yanofskybacteria;f__uncultured_bacterium;g__<empty>	0	0	0.000251125	0	0	0	0	0	0
k__Bacteria;p__Chloroflexi;c__Dehalococcoidia;o__SPG12-461-471-B8;f__uncultured_bacterium;g__<empty>	0.000158082	0	9.25198e-05	0	0	0	0	0	0
k__Bacteria;p__Planctomycetes;c__OM190;o__uncultured_bacterium;f__<empty>;g__<empty>	0.000109441	0	0	0.000140898	0	0	0	0	0
k__Archaea;p__Euryarchaeota;c__Thermoplasmata;o__uncultured;f__uncultured_archaeon;g__	0	0	0.000151997	0	0	0	9.78487e-05	0	0
k__Bacteria;p__Armatimonadetes;c__uncultured;o__uncultured_bacterium;f__<empty>;g__<empty>	0	0	0	0	0.000249493	0	0	0	0
k__Bacteria;p__Proteobacteria;c__Deltaproteobacteria;o__NB1-j;f__uncultured_bacterium;g__<empty>	0	0	0	0.000110077	0.000136087	0	0	0	0
k__Bacteria;p__Proteobacteria;c__Gammaproteobacteria;o__Gammaproteobacteria_Incertae_Sedis;f__Unknown_Family;g__	0.000133761	0	0.000112345	0	0	0	0	0	0
k__Bacteria;p__Patescibacteria;c__Berkelbacteria;o__Candidatus_Berkelbacteria_bacterium_RIFOXYA2_FULL_43_10;f__<empty>;g__	0.000145921	0	0	0	0	0	9.78487e-05	0	0
k__Bacteria;p__Latescibacteria;c__uncultured_bacterium;o__<empty>;f__<empty>;g__	0	0	0	0	0.000238152	0	0	0	0
k__Bacteria;p__Acidobacteria;c__c5LKS83;o__;f__;g__	0	0	0	8.80615e-05	0.000147427	0	0	0	0
k__Bacteria;p__Patescibacteria;c__Microgenomatia;o__uncultured_bacterium;f__<empty>;g__	0	0	8.59112e-05	0	0	0	0	0	0.000143969
k__Bacteria;p__Patescibacteria;c__Parcubacteria;o__GWA2-38-13b;f__uncultured_Parcubacteria_group_bacterium;g__<empty>	9.7281e-05	0.00013185	0	0	0	0	0	0	0
k__Bacteria;p__Proteobacteria;c__Deltaproteobacteria;o__Myxococcales;f__Eel-36e1D6;g__uncultured_Polyangiaceae_bacterium	0	0	0.000105737	0	0.000113406	0	0	0	0
k__Bacteria;p__Elusimicrobia;c__Lineage_IIc;o__Elusimicrobia_bacterium_CG1_02_37_114;f__<empty>;g__	0	0	9.91283e-05	0	0	0	0.000118816	0	0
k__Archaea;p__Nanoarchaeaeota;c__Woesearchaeia;o__uncultured_archaeon;f__<empty>;g__<empty>	0.000206722	0	0	0	0	0	0	0	0
k__Bacteria;p__Chlamydiae;c__Chlamydiae;o__Chlamydiales;f__Parachlamydiaceae;g__	0	0	9.25198e-05	0	0	0	0.000111827	0	0
k__Bacteria;p__Latescibacteria;c__uncultured_organism;o__<empty>;f__<empty>;g__<empty>	0	0	0	0	0.00020413	0	0	0	0
k__Bacteria;p__Planctomycetes;c__Phycisphaerae;o__mle1-8;f__uncultured_bacterium;g__<empty>	0	0	0	0	0.00020413	0	0	0	0
k__Bacteria;p__Patescibacteria;c__Kazania;o__uncultured_bacterium;f__<empty>;g__<empty>	0	9.49317e-05	0	0	0	0	0	0	9.25516e-05
k__Archaea;p__Asgardaeota;c__Odinarchaeia;o__uncultured_archaeon;f__<empty>;g__	0	0	0	0	0	0	0	0	0.000185103
k__Bacteria;p__Latescibacteria;c__uncultured_organism;o__<empty>;f__<empty>;g__	0	0	0	0	0	0	0	0	0.000185103
k__Bacteria;p__Chloroflexi;c__Dehalococcoidia;o__vadinBA26;f__uncultured_bacterium;g__	0	0	0.00018504	0	0	0	0	0	0
k__Bacteria;p__Patescibacteria;c__Gracilibacteria;o__Candidatus_Peribacteria;f__uncultured_bacterium;g__	0.000182402	0	0	0	0	0	0	0	0
k__Bacteria;p__BRC1;c__uncultured_bacterium;o__<empty>;f__<empty>;g__	0	0	0	0	0.000181449	0	0	0	0
k__Bacteria;p__Elusimicrobia;c__Rs-M47;o__uncultured_bacterium;f__<empty>;g__	0	8.96577e-05	0	0	9.07245e-05	0	0	0	0
k__Bacteria;p__Proteobacteria;c__Gammaproteobacteria;o__Xanthomonadales;f__Rhodanobacteraceae;g__Dokdonella	0	0	0	8.80615e-05	9.07245e-05	0	0	0	0
k__Bacteria;p__Planctomycetes;c__Phycisphaerae;o__Phycisphaerales;f__Phycisphaeraceae;g__	8.51209e-05	0	0	0	9.07245e-05	0	0	0	0
k__Bacteria;p__Bacteroidetes;c__Bacteroidia;o__Bacteroidales;f__Bacteroidaceae;g__Bacteroides	0	0	0	0	0	0	0	0	0.00017482
k__Bacteria;p__Firmicutes;c__Clostridia;o__Clostridiales;f__Clostridiales_vadinBB60_group;g__uncultured_bacterium	0	0	0	0	0	0	0	0	0.00017482
k__Bacteria;p__Patescibacteria;c__Gracilibacteria;o__Candidatus_Peregrinibacteria;f__uncultured_organism;g__<empty>	0	0	0	0	0.000170109	0	0	0	0
k__Bacteria;p__Firmicutes;c__Bacilli;o__Bacillales;f__Bacillaceae;g__Caldalkalibacillus	0	0	0	0	0	0	0	0	0.000164536
k__Bacteria;p__Firmicutes;c__Clostridia;o__Clostridiales;f__Ruminococcaceae;g__Faecalibacterium	0	0	0	0	0	0	0	0	0.000164536
k__Bacteria;p__Chloroflexi;c__JG30-KF-CM66;o__uncultured_bacterium;f__<empty>;g__	0	0	0	0	0.000158768	0	0	0	0
k__Bacteria;p__Planctomycetes;c__Brocadiae;o__SM23-32;f__uncultured_bacterium;g__	0	0	0	0	0.000158768	0	0	0	0
k__Archaea;p__Thaumarchaeota;c__Nitrososphaeria;o__Nitrososphaerales;f__Nitrososphaeraceae;g__Candidatus_Nitrocosmicus	0.000158082	0	0	0	0	0	0	0	0
k__Bacteria;p__Chloroflexi;c__Anaerolineae;o__RBG-13-54-9;f__;g__	0.000158082	0	0	0	0	0	0	0	0
k__Bacteria;p__Proteobacteria;c__Alphaproteobacteria;o__Rhizobiales;f__Methyloligellaceae;g__uncultured	0	0	0	0	0	0	0	0	0.000154253
k__Bacteria;p__Chloroflexi;c__Dehalococcoidia;o__Dehalococcoidales;f__uncultured;g__uncultured_bacterium	0	0	0	0.000149705	0	0	0	0	0
k__Bacteria;p__Chloroflexi;c__Anaerolineae;o__;f__;g__	0	0	0	0	0.000147427	0	0	0	0
k__Bacteria;p__Chloroflexi;c__Dehalococcoidia;o__GIF3;f__uncultured_organism;g__<empty>	0	0	0	0	0.000147427	0	0	0	0
k__Bacteria;p__Chloroflexi;c__Dehalococcoidia;o__Napoli-4B-65;f__uncultured_bacterium;g__	0	0	0	0	0.000147427	0	0	0	0
k__Bacteria;p__Planctomycetes;c__ODP123;o__uncultured_bacterium;f__<empty>;g__<empty>	0	0	0	0	0.000147427	0	0	0	0
k__Bacteria;p__Planctomycetes;c__Phycisphaerae;o__Phycisphaerales;f__Phycisphaeraceae;g__Urania-1B-19_marine_sediment_group	0	0	0	0	0.000147427	0	0	0	0
k__Bacteria;p__Planctomycetes;c__SGST604;o__uncultured_organism;f__<empty>;g__	0	0	0	0	0.000147427	0	0	0	0
k__Archaea;p__Crenarchaeota;c__;o__;f__;g__	0.000145921	0	0	0	0	0	0	0	0
k__Archaea;p__Nanoarchaeaeota;c__Woesearchaeia;o__Candidatus_Staskawiczbacteria_bacterium_RIFCSPHIGHO2_01_FULL_34_27;f__<empty>;g__	0.000145921	0	0	0	0	0	0	0	0
k__Bacteria;p__Bacteroidetes;c__Ignavibacteria;o__OPB56;f__uncultured_bacterium;g__<empty>	0.000145921	0	0	0	0	0	0	0	0
k__Bacteria;p__Chloroflexi;c__Anaerolineae;o__RBG-13-54-9;f__uncultured_bacterium;g__<empty>	0.000145921	0	0	0	0	0	0	0	0
k__Bacteria;p__Proteobacteria;c__Deltaproteobacteria;o__MBNT15;f__uncultured_organism;g__<empty>	0.000145921	0	0	0	0	0	0	0	0
k__Bacteria;p__Firmicutes;c__Clostridia;o__Clostridiales;f__Family_XI;g__Gottschalkia	0	0	0.000145388	0	0	0	0	0	0
k__Bacteria;p__Chloroflexi;c__Dehalococcoidia;o__1226B1H1-22-FL;f__uncultured_bacterium;g__<empty>	0	0	0	0	0	0	0	0	0.000143969
k__Bacteria;p__Elusimicrobia;c__Endomicrobia;o__Endomicrobiales;f__Endomicrobiaceae;g__	0	0.000142398	0	0	0	0	0	0	0
k__Bacteria;p__Patescibacteria;c__ABY1;o__Candidatus_Kerfeldbacteria;f__metagenome;g__<empty>	0	0.000142398	0	0	0	0	0	0	0
k__Bacteria;p__Patescibacteria;c__Gracilibacteria;o__uncultured_organism;f__<empty>;g__	0	0	0.00013878	0	0	0	0	0	0
k__Bacteria;p__Elusimicrobia;c__Lineage_IIa;o__Elusimicrobia_bacterium_RIFCSPLOWO2_01_FULL_59_12;f__<empty>;g__	0	0.000137124	0	0	0	0	0	0	0
k__Bacteria;p__Planctomycetes;c__Phycisphaerae;o__C86;f__;g__	0	0	0	0	0.000136087	0	0	0	0
k__Bacteria;p__Planctomycetes;c__Pla4_lineage;o__uncultured_bacterium;f__<empty>;g__	0	0	0	0	0.000136087	0	0	0	0
k__Bacteria;p__Planctomycetes;c__Pla4_lineage;o__uncultured_planctomycete;f__<empty>;g__	0	0	0	0	0.000136087	0	0	0	0
k__Bacteria;p__Proteobacteria;c__Deltaproteobacteria;o__MBNT15;f__uncultured_bacterium;g__	0	0	0	0	0.000136087	0	0	0	0
k__Bacteria;p__Dependentiae;c__Babeliae;o__Babeliales;f__Babeliaceae;g__	0.000133761	0	0	0	0	0	0	0	0
k__Bacteria;p__Latescibacteria;c__Latescibacteria;o__Latescibacterales;f__Latescibacteraceae;g__Latescibacteria_bacterium_SCGC_AAA257-K07	0.000133761	0	0	0	0	0	0	0	0
k__Bacteria;p__Latescibacteria;c__uncultured_Verrucomicrobia_bacterium;o__<empty>;f__<empty>;g__<empty>	0.000133761	0	0	0	0	0	0	0	0
k__Bacteria;p__Planctomycetes;c__Pla3_lineage;o__uncultured_organism;f__<empty>;g__	0.000133761	0	0	0	0	0	0	0	0
k__Bacteria;p__Proteobacteria;c__Deltaproteobacteria;o__Myxococcales;f__VHS-B4-70;g__uncultured_delta_proteobacterium	0.000133761	0	0	0	0	0	0	0	0
k__Bacteria;p__Bacteroidetes;c__Bacteroidia;o__Bacteroidales;f__Bacteroidetes_vadinHA17;g__uncultured_bacterium	0	0	0	0	0	0	0	0	0.000133686
k__Bacteria;p__Proteobacteria;c__Alphaproteobacteria;o__Rickettsiales;f__Mitochondria;g__uncultured_alpha_proteobacterium	0	0	0	0	0	0	0	0	0.000133686
k__Bacteria;p__Patescibacteria;c__Gracilibacteria;o__Candidatus_Peregrinibacteria;f__uncultured_bacterium;g__<empty>	0	0.000126576	0	0	0	0	0	0	0
k__Bacteria;p__Tenericutes;c__Mollicutes;o__Izimaplasmatales;f__Izimaplasmataceae;g__Izimaplasma	0	0	0	0	0	0	0	0.000125913	0
k__Bacteria;p__Bacteroidetes;c__Bacteroidia;o__Bacteroidales;f__;g__	0	0	0	0	0	0	0.000125806	0	0
k__Bacteria;p__Chloroflexi;c__Dehalococcoidia;o__H3.93;f__uncultured_bacterium;g__	0	0	0	0	0.000124746	0	0	0	0
k__Bacteria;p__Fibrobacteres;c__Fibrobacteria;o__Fibrobacterales;f__possible_family_01;g__	0	0	0	0	0.000124746	0	0	0	0
k__Bacteria;p__Patescibacteria;c__ABY1;o__Candidatus_Falkowbacteria;f__Candidatus_Falkowbacteria_bacterium_GW2011_GWA2_41_14;g__<empty>	0	0	0	0	0.000124746	0	0	0	0
k__Bacteria;p__Proteobacteria;c__Alphaproteobacteria;o__Rhodobacterales;f__Rhodobacteraceae;g__uncultured	0	0	0	0	0.000124746	0	0	0	0
k__Bacteria;p__Firmicutes;c__Clostridia;o__Clostridiales;f__Lachnospiraceae;g__Blautia	0	0	0	0	0	0	0	0	0.000123402
k__Bacteria;p__Spirochaetes;c__Leptospirae;o__Leptospirales;f__Leptospiraceae;g__	0	0	0	0	0	0	0	0	0.000123402
k__Bacteria;p__Planctomycetes;c__Pla3_lineage;o__;f__;g__	0	0	0	0.000123286	0	0	0	0	0
k__Bacteria;p__Firmicutes;c__Clostridia;o__Clostridiales;f__Syntrophomonadaceae;g__	0.000121601	0	0	0	0	0	0	0	0
k__Bacteria;p__Planctomycetes;c__Phycisphaerae;o__MSBL9;f__SG8-4;g__uncultured_microorganism	0.000121601	0	0	0	0	0	0	0	0
k__Bacteria;p__Proteobacteria;c__Deltaproteobacteria;o__PB19;f__uncultured_bacterium;g__<empty>	0.000121601	0	0	0	0	0	0	0	0
k__Bacteria;p__Chloroflexi;c__Dehalococcoidia;o__661239;f__uncultured_bacterium;g__<empty>	0	0.000121302	0	0	0	0	0	0	0
k__Bacteria;p__BHI80-139;c__uncultured_bacterium;o__<empty>;f__<empty>;g__	0	0	0.000118954	0	0	0	0	0	0
k__Bacteria;p__Proteobacteria;c__Deltaproteobacteria;o__Bradymonadales;f__uncultured_Geobacteraceae_bacterium;g__<empty>	0	0	0	0.00011448	0	0	0	0	0
k__Archaea;p__Diapherotrites;c__Iainarchaeia;o__;f__;g__	0	0	0	0	0.000113406	0	0	0	0
k__Bacteria;p__Calditrichaeota;c__Calditrichia;o__Calditrichales;f__Calditrichaceae;g__Caldithrix	0	0	0	0	0.000113406	0	0	0	0
k__Bacteria;p__Chloroflexi;c__Dehalococcoidia;o__t0.6.f;f__;g__	0	0	0	0	0.000113406	0	0	0	0
k__Bacteria;p__Chloroflexi;c__Dehalococcoidia;o__MSBL5;f__uncultured_bacterium;g__	0	0	0	0	0	0	0	0	0.000113119
k__Bacteria;p__LCP-89;c__uncultured_organism;o__<empty>;f__<empty>;g__	0	0	0	0	0	0	0	0	0.000113119
k__Bacteria;p__Patescibacteria;c__ABY1;o__Candidatus_Kerfeldbacteria;f__uncultured_bacterium;g__	0	0	0	0	0	0	0	0	0.000113119
k__Bacteria;p__Patescibacteria;c__Parcubacteria;o__Paceibacterales;f__Paceibacteraceae;g__	0	0	0	0	0	0	0	0	0.000113119
k__Archaea;p__Euryarchaeota;c__Thermococci;o__Methanofastidiosales;f__uncultured;g__uncultured_archaeon	0.000109441	0	0	0	0	0	0	0	0
k__Bacteria;p__Fibrobacteres;c__Fibrobacteria;o__Fibrobacterales;f__uncultured_bacterium;g__	0.000109441	0	0	0	0	0	0	0	0
k__Bacteria;p__Patescibacteria;c__ABY1;o__Candidatus_Falkowbacteria;f__marine_metagenome;g__	0.000109441	0	0	0	0	0	0	0	0
k__Bacteria;p__Proteobacteria;c__Deltaproteobacteria;o__Myxococcales;f__MSB-4B10;g__uncultured_delta_proteobacterium	0.000109441	0	0	0	0	0	0	0	0
k__Bacteria;p__Proteobacteria;c__Gammaproteobacteria;o__uncultured;f__uncultured_bacterium;g__<empty>	0.000109441	0	0	0	0	0	0	0	0
k__Archaea;p__Diapherotrites;c__Iainarchaeia;o__Iainarchaeales;f__Diapherotrites_archaeon_SCGC_AAA011-K09;g__	0	0	0.000105737	0	0	0	0	0	0
k__Bacteria;p__Dependentiae;c__Babeliae;o__Babeliales;f__;g__	0	0	0.000105737	0	0	0	0	0	0
k__Bacteria;p__Proteobacteria;c__Alphaproteobacteria;o__Rickettsiales;f__Mitochondria;g__Asplenium_nidus_(bird's-nest_fern)	0	0	0.000105737	0	0	0	0	0	0
k__Bacteria;p__Chloroflexi;c__Dehalococcoidia;o__GIF9;f__AB-539-J10;g__Dsc1	0	0	0	0.000105674	0	0	0	0	0
k__Bacteria;p__Elusimicrobia;c__Elusimicrobia;o__Lineage_IV;f__uncultured_bacterium;g__	0	0	0	0	0	0	0.000104838	0	0
k__Bacteria;p__Planctomycetes;c__BD7-11;o__uncultured_bacterium;f__<empty>;g__	0	0	0	0	0	0	0	0	0.000102835
k__Bacteria;p__Spirochaetes;c__Spirochaetia;o__Spirochaetales;f__Spirochaetaceae;g__uncultured	0	0	0	0	0	0	0	0	0.000102835
k__Bacteria;p__Acidobacteria;c__d142;o__uncultured_Acidobacteria_bacterium;f__<empty>;g__<empty>	0	0	0	0	0.000102065	0	0	0	0
k__Bacteria;p__Chlamydiae;c__LD1-PA32;o__;f__;g__	0	0	0	0	0.000102065	0	0	0	0
k__Bacteria;p__Chloroflexi;c__Dehalococcoidia;o__FS117-23B-02;f__uncultured_bacterium;g__<empty>	0	0	0	0	0.000102065	0	0	0	0
k__Bacteria;p__Planctomycetes;c__Phycisphaerae;o__mle1-8;f__uncultured_organism;g__<empty>	0	0	0	0	0.000102065	0	0	0	0
k__Bacteria;p__Planctomycetes;c__Phycisphaerae;o__Pla1_lineage;f__uncultured_organism;g__	0	0	0	0.000101271	0	0	0	0	0
k__Bacteria;p__Tenericutes;c__Mollicutes;o__Izimaplasmatales;f__Izimaplasmataceae;g__	0	0	0	0	0	0	0	0.00010073	0
k__Bacteria;p__Elusimicrobia;c__Lineage_IIa;o__;f__;g__	0	0.000100206	0	0	0	0	0	0	0
k__Bacteria;p__Proteobacteria;c__Gammaproteobacteria;o__Legionellales;f__Legionellaceae;g__Legionella	0	0	9.91283e-05	0	0	0	0	0	0
k__Bacteria;p__Bacteroidetes;c__Ignavibacteria;o__OPB56;f__;g__	9.7281e-05	0	0	0	0	0	0	0	0
k__Bacteria;p__Actinobacteria;c__Thermoleophilia;o__Solirubrobacterales;f__67-14;g__uncultured_actinobacterium	0	0	0	9.68677e-05	0	0	0	0	0
k__Bacteria;p__Planctomycetes;c__vadinHA49;o__;f__;g__	0	0	0	9.24646e-05	0	0	0	0	0
k__Bacteria;p__Planctomycetes;c__Pla4_lineage;o__;f__;g__	0	0	0	0	9.07245e-05	0	0	0	0
k__Bacteria;p__Proteobacteria;c__Deltaproteobacteria;o__Myxococcales;f__BIrii41;g__uncultured_bacterium	0	0	0	0	9.07245e-05	0	0	0	0
k__Bacteria;p__Patescibacteria;c__Parcubacteria;o__CG1-02-42-13;f__uncultured_organism;g__	0	8.96577e-05	0	0	0	0	0	0	0
k__Archaea;p__Diapherotrites;c__Iainarchaeia;o__Iainarchaeales;f__uncultured_archaeon;g__<empty>	8.51209e-05	0	0	0	0	0	0	0	0
k__Bacteria;p__Chloroflexi;c__Anaerolineae;o__Anaerolineales;f__Anaerolineaceae;g__Ornatilinea	8.51209e-05	0	0	0	0	0	0	0	0
k__Bacteria;p__Elusimicrobia;c__Elusimicrobia;o__Lineage_IV;f__Elusimicrobia_bacterium_GWA2_69_24;g__	8.51209e-05	0	0	0	0	0	0	0	0
k__Bacteria;p__Firmicutes;c__Clostridia;o__Clostridiales;f__Clostridiales_vadinBB60_group;g__	8.51209e-05	0	0	0	0	0	0	0	0

## Sheet: inoculum; 0.001% MRB
Table S2. Community analysis by 16S rRNA gene amplicon sequencing of the inoculum and negative control enrichments.
relative abundancies of taxa, with minimum relative abundance of OTUs set to 0.001%
taxon	inoculum
NA;p__;c__;o__;f__;g__	0.0920161
k__Bacteria;p__Proteobacteria;c__Deltaproteobacteria;o__Desulfarculales;f__Desulfarculaceae;g__Desulfatiglans	0.0782321
k__Bacteria;p__Planctomycetes;c__Phycisphaerae;o__MSBL9;f__SG8-4;g__uncultured_bacterium	0.056633
k__Bacteria;p__Chloroflexi;c__Anaerolineae;o__Anaerolineales;f__Anaerolineaceae;g__uncultured	0.052371
k__Bacteria;p__Chloroflexi;c__Anaerolineae;o__Thermoflexales;f__Thermoflexaceae;g__Thermoflexus	0.0413818
k__Bacteria;p__Acetothermia;c__Acetothermiia;o__uncultured_bacterium;f__<empty>;g__<empty>	0.0362315
k__Bacteria;p__Acidobacteria;c__Aminicenantia;o__Aminicenantales;f__uncultured_bacterium;g__<empty>	0.0322191
k__Bacteria;p__Atribacteria;c__JS1;o__uncultured_bacterium;f__<empty>;g__<empty>	0.0255617
k__Bacteria;p__Zixibacteria;c__uncultured_bacterium;o__<empty>;f__<empty>;g__<empty>	0.0229566
k__Archaea;p__Euryarchaeota;c__Thermoplasmata;o__Marine_Benthic_Group_D_and_DHVEG-1;f__uncultured_archaeon;g__<empty>	0.0208206
k__Archaea;p__Nanoarchaeaeota;c__Woesearchaeia;o__;f__;g__	0.0198525
k__Bacteria;p__Planctomycetes;c__Planctomycetacia;o__Pirellulales;f__Pirellulaceae;g__uncultured	0.0146922
k__Bacteria;p__Chloroflexi;c__Dehalococcoidia;o__GIF9;f__uncultured_bacterium;g__<empty>	0.0140035
k__Bacteria;p__Chloroflexi;c__Anaerolineae;o__SBR1031;f__uncultured_bacterium;g__<empty>	0.0130254
k__Bacteria;p__Omnitrophicaeota;c__uncultured_bacterium;o__<empty>;f__<empty>;g__<empty>	0.0125762
k__Bacteria;p__Acetothermia;c__Acetothermiia;o__;f__;g__	0.0123367
k__Bacteria;p__Planctomycetes;c__Phycisphaerae;o__MSBL9;f__SG8-4;g__	0.00991127
k__Bacteria;p__Chloroflexi;c__Anaerolineae;o__SBR1031;f__uncultured_organism;g__<empty>	0.00922257
k__Bacteria;p__Omnitrophicaeota;c__uncultured_bacterium;o__<empty>;f__<empty>;g__	0.00900298
k__Bacteria;p__Chloroflexi;c__Anaerolineae;o__Anaerolineales;f__Anaerolineaceae;g__	0.00856381
k__Bacteria;p__Planctomycetes;c__Planctomycetacia;o__Pirellulales;f__Pirellulaceae;g__Pir4_lineage	0.00839414
k__Bacteria;p__Cyanobacteria;c__Oxyphotobacteria;o__Synechococcales;f__Cyanobiaceae;g__Synechococcus_CC9902	0.00837417
k__Bacteria;p__Proteobacteria;c__Deltaproteobacteria;o__Desulfobacterales;f__Desulfobacteraceae;g__SEEP-SRB1	0.00785515
k__Archaea;p__Crenarchaeota;c__Bathyarchaeia;o__uncultured_archaeon;f__<empty>;g__<empty>	0.00784517
k__Bacteria;p__Aerophobetes;c__uncultured_bacterium;o__<empty>;f__<empty>;g__<empty>	0.00739602
k__Bacteria;p__Cloacimonetes;c__Cloacimonadia;o__MSBL2;f__metagenome;g__<empty>	0.00669734
k__Archaea;p__Nanoarchaeaeota;c__Woesearchaeia;o__marine_metagenome;f__<empty>;g__<empty>	0.00655761
k__Bacteria;p__Chloroflexi;c__Dehalococcoidia;o__MSBL5;f__uncultured_bacterium;g__<empty>	0.00654762
k__Bacteria;p__Spirochaetes;c__Spirochaetia;o__Spirochaetales;f__Spirochaetaceae;g__Spirochaeta_2	0.00616834
k__Bacteria;p__Chloroflexi;c__Anaerolineae;o__Thermoflexales;f__Thermoflexaceae;g__	0.00595874
k__Bacteria;p__Chloroflexi;c__Dehalococcoidia;o__GIF9;f__AB-539-J10;g__SCGC-AB-539-J10	0.00584895
k__Bacteria;p__LCP-89;c__uncultured_bacterium;o__<empty>;f__<empty>;g__<empty>	0.00580902
k__Bacteria;p__Nitrospirae;c__Nitrospira;o__Nitrospirales;f__Nitrospiraceae;g__Nitrospira	0.00526006
k__Bacteria;p__Chloroflexi;c__Dehalococcoidia;o__GIF3;f__uncultured_bacterium;g__<empty>	0.00525008
k__Bacteria;p__Bacteroidetes;c__Bacteroidia;o__Bacteroidales;f__Bacteroidetes_BD2-2;g__uncultured_bacterium	0.00499057
k__Archaea;p__Asgardaeota;c__Lokiarchaeia;o__uncultured_archaeon;f__<empty>;g__<empty>	0.00489076
k__Bacteria;p__Actinobacteria;c__WCHB1-81;o__uncultured_bacterium;f__<empty>;g__<empty>	0.00489076
k__Bacteria;p__Planctomycetes;c__Phycisphaerae;o__Phycisphaerales;f__AKAU3564_sediment_group;g__uncultured_bacterium	0.004761
k__Bacteria;p__Chloroflexi;c__Anaerolineae;o__ADurb.Bin180;f__uncultured_bacterium;g__	0.00463125
k__Archaea;p__Nanoarchaeaeota;c__Woesearchaeia;o__uncultured_crenarchaeote;f__<empty>;g__	0.00461128
k__Archaea;p__Nanoarchaeaeota;c__Woesearchaeia;o__uncultured_euryarchaeote;f__<empty>;g__	0.00452145
k__Bacteria;p__Cyanobacteria;c__Oxyphotobacteria;o__Chloroplast;f__;g__	0.00380281
k__Bacteria;p__Bacteroidetes;c__Bacteroidia;o__Bacteroidales;f__Bacteroidetes_BD2-2;g__	0.00375291
k__Bacteria;p__Chloroflexi;c__Anaerolineae;o__SBR1031;f__uncultured_organism;g__	0.00375291
k__Bacteria;p__Proteobacteria;c__Deltaproteobacteria;o__Desulfarculales;f__Desulfarculaceae;g__	0.00375291
k__Bacteria;p__Planctomycetes;c__Phycisphaerae;o__MSBL9;f__SM23-30;g__	0.00362315
k__Archaea;p__Nanoarchaeaeota;c__Woesearchaeia;o__marine_metagenome;f__<empty>;g__	0.00344349
k__Bacteria;p__Epsilonbacteraeota;c__Campylobacteria;o__Campylobacterales;f__Thiovulaceae;g__Sulfurimonas	0.00330376
k__Archaea;p__Nanoarchaeaeota;c__Woesearchaeia;o__uncultured_archaeon;f__<empty>;g__	0.00325385
k__Bacteria;p__Planctomycetes;c__Phycisphaerae;o__MSBL9;f__4572-13;g__uncultured_bacterium	0.00314406
k__Bacteria;p__Calditrichaeota;c__Calditrichia;o__Calditrichales;f__Calditrichaceae;g__	0.00306421
k__Bacteria;p__Chloroflexi;c__Anaerolineae;o__Anaerolineales;f__Anaerolineaceae;g__Pelolinea	0.00300432
k__Bacteria;p__Chloroflexi;c__Dehalococcoidia;o__GIF9;f__AB-539-J10;g__uncultured_bacterium	0.0029644
k__Bacteria;p__Calditrichaeota;c__Calditrichia;o__Calditrichales;f__Calditrichaceae;g__uncultured_bacterium	0.00293445
k__Bacteria;p__Chloroflexi;c__Anaerolineae;o__SBR1031;f__uncultured_Chloroflexi_bacterium;g__<empty>	0.00291449
k__Bacteria;p__Proteobacteria;c__Deltaproteobacteria;o__Sva0485;f__;g__	0.00286459
k__Bacteria;p__Planctomycetes;c__Phycisphaerae;o__Phycisphaerales;f__AKAU3564_sediment_group;g__	0.00279472
k__Bacteria;p__Chloroflexi;c__Dehalococcoidia;o__;f__;g__	0.002645
k__Bacteria;p__Latescibacteria;c__Latescibacteria;o__Latescibacterales;f__Latescibacteraceae;g__Candidatus_Latescibacter	0.00263502
k__Bacteria;p__Planctomycetes;c__Phycisphaerae;o__CCM11a;f__uncultured_bacterium;g__<empty>	0.00252523
k__Bacteria;p__Acidobacteria;c__Aminicenantia;o__Aminicenantales;f__uncultured_bacterium;g__	0.00244538
k__Bacteria;p__Chloroflexi;c__Dehalococcoidia;o__GIF9;f__uncultured_bacterium;g__	0.00241543
k__Bacteria;p__Firmicutes;c__Bacilli;o__Bacillales;f__Bacillaceae;g__Bacillus	0.00241543
k__Bacteria;p__Cyanobacteria;c__Oxyphotobacteria;o__Synechococcales;f__Cyanobiaceae;g__Cyanobium_PCC-6307	0.00240545
k__Bacteria;p__Bacteroidetes;c__Bacteroidia;o__Bacteroidales;f__Bacteroidetes_BD2-2;g__uncultured_organism	0.00231562
k__Bacteria;p__Chloroflexi;c__Anaerolineae;o__ADurb.Bin180;f__uncultured_bacterium;g__<empty>	0.00231562
k__Bacteria;p__Atribacteria;c__JS1;o__uncultured_bacterium;f__<empty>;g__	0.00215593
k__Archaea;p__Euryarchaeota;c__Methanomicrobia;o__Methanosarcinales;f__Methanosarcinaceae;g__Methanococcoides	0.00214594
k__Archaea;p__Nanoarchaeaeota;c__Woesearchaeia;o__uncultured_crenarchaeote;f__<empty>;g__<empty>	0.00210602
k__Bacteria;p__Planctomycetes;c__Planctomycetacia;o__Pirellulales;f__Pirellulaceae;g__	0.0020661
k__Bacteria;p__Latescibacteria;c__Latescibacteria;o__Latescibacterales;f__Latescibacteraceae;g__uncultured_bacterium	0.00197626
k__Bacteria;p__Cloacimonetes;c__Cloacimonadia;o__Cloacimonadales;f__MSBL8;g__uncultured_bacterium	0.0019563
k__Bacteria;p__Planctomycetes;c__SPG12-343-353-B69;o__uncultured_bacterium;f__<empty>;g__	0.0019563
k__Bacteria;p__Proteobacteria;c__Deltaproteobacteria;o__Desulfobacterales;f__Desulfobacteraceae;g__uncultured	0.0019563
k__Bacteria;p__Planctomycetes;c__Phycisphaerae;o__MSBL9;f__SG8-4;g__uncultured_organism	0.00194632
k__Archaea;p__Euryarchaeota;c__Thermoplasmata;o__Marine_Benthic_Group_D_and_DHVEG-1;f__;g__	0.00191638
k__Bacteria;p__Kiritimatiellaeota;c__Kiritimatiellae;o__WCHB1-41;f__uncultured_bacterium;g__	0.00191638
k__Bacteria;p__AncK6;c__uncultured_bacterium;o__<empty>;f__<empty>;g__<empty>	0.00188643
k__Bacteria;p__Chloroflexi;c__Dehalococcoidia;o__FS117-23B-02;f__uncultured_bacterium;g__	0.00186647
k__Bacteria;p__Aegiribacteria;c__uncultured_bacterium;o__<empty>;f__<empty>;g__<empty>	0.00180659
k__Bacteria;p__WOR-1;c__uncultured_bacterium;o__<empty>;f__<empty>;g__<empty>	0.00177664
k__Bacteria;p__Chloroflexi;c__Dehalococcoidia;o__Sh765B-AG-111;f__uncultured_bacterium;g__<empty>	0.00170677
k__Bacteria;p__Chloroflexi;c__Dehalococcoidia;o__MSBL5;f__uncultured_bacterium;g__	0.00167683
k__Bacteria;p__Latescibacteria;c__uncultured_bacterium;o__<empty>;f__<empty>;g__<empty>	0.00165687
k__Bacteria;p__TA06;c__uncultured_bacterium;o__<empty>;f__<empty>;g__	0.00163691
k__Bacteria;p__Nitrospirae;c__Nitrospira;o__Nitrospirales;f__Nitrospiraceae;g__	0.00159698
k__Bacteria;p__Planctomycetes;c__Phycisphaerae;o__DG-20;f__uncultured_bacterium;g__<empty>	0.001587
k__Bacteria;p__WOR-1;c__uncultured_bacterium;o__<empty>;f__<empty>;g__	0.00156704
k__Bacteria;p__Planctomycetes;c__Phycisphaerae;o__MSBL9;f__4572-13;g__	0.00154708
k__Bacteria;p__Kiritimatiellaeota;c__Kiritimatiellae;o__WCHB1-41;f__uncultured_bacterium;g__<empty>	0.00152711
k__Bacteria;p__Patescibacteria;c__Parcubacteria;o__uncultured_bacterium;f__<empty>;g__	0.00151713
k__Bacteria;p__Omnitrophicaeota;c__;o__;f__;g__	0.00147721
k__Bacteria;p__Proteobacteria;c__Deltaproteobacteria;o__10bav-F6;f__uncultured_bacterium;g__<empty>	0.00147721
k__Bacteria;p__Zixibacteria;c__uncultured_bacterium;o__<empty>;f__<empty>;g__	0.00147721
k__Bacteria;p__Proteobacteria;c__Deltaproteobacteria;o__Syntrophobacterales;f__Syntrophaceae;g__uncultured	0.00146723
k__Bacteria;p__Planctomycetes;c__Phycisphaerae;o__MSBL9;f__SM23-30;g__uncultured_bacterium	0.0014273
k__Bacteria;p__Aegiribacteria;c__uncultured_sediment_bacterium;o__<empty>;f__<empty>;g__<empty>	0.00140734
k__Bacteria;p__Hydrogenedentes;c__Hydrogenedentia;o__Hydrogenedentiales;f__Hydrogenedensaceae;g__uncultured_organism	0.00140734
k__Bacteria;p__WS2;c__uncultured_bacterium;o__<empty>;f__<empty>;g__<empty>	0.00138738
k__Archaea;p__Euryarchaeota;c__Thermoplasmata;o__uncultured;f__uncultured_archaeon;g__<empty>	0.00134745
k__Bacteria;p__Chloroflexi;c__Dehalococcoidia;o__Napoli-4B-65;f__uncultured_bacterium;g__<empty>	0.00133747
k__Bacteria;p__Dependentiae;c__Babeliae;o__Babeliales;f__uncultured_bacterium;g__	0.00133747
k__Bacteria;p__LCP-89;c__uncultured_bacterium;o__<empty>;f__<empty>;g__	0.00133747
k__Bacteria;p__Bacteroidetes;c__Ignavibacteria;o__SJA-28;f__uncultured_bacterium;g__<empty>	0.00131751
k__Bacteria;p__Bacteroidetes;c__Bacteroidia;o__Sphingobacteriales;f__Lentimicrobiaceae;g__uncultured_bacterium	0.00130753
k__Bacteria;p__Proteobacteria;c__Deltaproteobacteria;o__Desulfobacterales;f__Desulfobacteraceae;g__Desulfoconvexum	0.00130753
k__Bacteria;p__Chloroflexi;c__Dehalococcoidia;o__FW22;f__uncultured_bacterium;g__<empty>	0.00129755
k__Bacteria;p__Kiritimatiellaeota;c__Kiritimatiellae;o__WCHB1-41;f__uncultured_organism;g__<empty>	0.00124764
k__Bacteria;p__Cyanobacteria;c__Oxyphotobacteria;o__Chloroplast;f__uncultured_bacterium;g__<empty>	0.00118776
k__Bacteria;p__Chloroflexi;c__Dehalococcoidia;o__GIF9;f__AB-539-J10;g__	0.00117777
k__Bacteria;p__Planctomycetes;c__Phycisphaerae;o__CCM11a;f__uncultured_planctomycete;g__<empty>	0.00116779
k__Bacteria;p__Proteobacteria;c__Deltaproteobacteria;o__Sva0485;f__uncultured_bacterium;g__<empty>	0.00116779
k__Bacteria;p__BHI80-139;c__uncultured_bacterium;o__<empty>;f__<empty>;g__<empty>	0.00114783
k__Bacteria;p__Fibrobacteres;c__Chitinivibrionia;o__uncultured;f__uncultured_bacterium;g__<empty>	0.00114783
k__Bacteria;p__Firmicutes;c__Clostridia;o__Clostridiales;f__Clostridiales_Incertae_Sedis;g__Dethiosulfatibacter	0.00113785
k__Bacteria;p__Kiritimatiellaeota;c__Kiritimatiellae;o__WCHB1-41;f__;g__	0.00113785
k__Archaea;p__Diapherotrites;c__Micrarchaeia;o__uncultured_euryarchaeote;f__<empty>;g__<empty>	0.00112787
k__Bacteria;p__BRC1;c__uncultured_bacterium;o__<empty>;f__<empty>;g__<empty>	0.00112787
k__Bacteria;p__Chlamydiae;c__LD1-PA32;o__uncultured_bacterium;f__<empty>;g__	0.00112787
k__Bacteria;p__Dependentiae;c__Babeliae;o__Babeliales;f__Vermiphilaceae;g__uncultured_bacterium	0.00109792
k__Archaea;p__Euryarchaeota;c__Thermococci;o__Methanofastidiosales;f__uncultured;g__	0.00107796
k__Bacteria;p__Marinimicrobia_(SAR406_clade);c__uncultured_bacterium;o__<empty>;f__<empty>;g__<empty>	0.00107796
k__Bacteria;p__WS1;c__uncultured_bacterium;o__<empty>;f__<empty>;g__<empty>	0.00104802
k__Bacteria;p__Acidobacteria;c__Acidobacteriia;o__Solibacterales;f__Solibacteraceae_(Subgroup_3);g__Bryobacter	0.00103804
k__Bacteria;p__Patescibacteria;c__Microgenomatia;o__uncultured_bacterium;f__<empty>;g__<empty>	0.00101808
k__Bacteria;p__CK-2C2-2;c__uncultured_bacterium;o__<empty>;f__<empty>;g__<empty>	0.000998114
k__Archaea;p__Nanoarchaeaeota;c__Nanohaloarchaeia;o__Aenigmarchaeales;f__uncultured_archaeon;g__<empty>	0.000988132
k__Bacteria;p__WOR-1;c__;o__;f__;g__	0.000988132
k__Bacteria;p__Actinobacteria;c__WCHB1-81;o__;f__;g__	0.000978151
k__Bacteria;p__Chloroflexi;c__Dehalococcoidia;o__vadinBA26;f__uncultured_bacterium;g__<empty>	0.000978151
k__Bacteria;p__Proteobacteria;c__Gammaproteobacteria;o__Betaproteobacteriales;f__Burkholderiaceae;g__Delftia	0.000978151
k__Bacteria;p__Acetothermia;c__Acetothermiia;o__uncultured_bacterium;f__<empty>;g__	0.000958189
k__Bacteria;p__Dependentiae;c__Babeliae;o__Babeliales;f__uncultured_bacterium;g__<empty>	0.000958189
k__Bacteria;p__Chloroflexi;c__Anaerolineae;o__ADurb.Bin180;f__uncultured_organism;g__<empty>	0.000948208
k__Bacteria;p__Chloroflexi;c__Anaerolineae;o__SBR1031;f__uncultured_bacterium;g__	0.000948208
k__Bacteria;p__Chloroflexi;c__Dehalococcoidia;o__uncultured_bacterium;f__<empty>;g__<empty>	0.000938227
k__Bacteria;p__Latescibacteria;c__;o__;f__;g__	0.000918264
k__Bacteria;p__Actinobacteria;c__RBG-16-55-12;o__uncultured_bacterium;f__<empty>;g__<empty>	0.000908283
k__Bacteria;p__Fibrobacteres;c__Fibrobacteria;o__Fibrobacterales;f__SBXY-748;g__	0.000908283
k__Bacteria;p__Proteobacteria;c__Gammaproteobacteria;o__Legionellales;f__Legionellaceae;g__uncultured	0.00087834
k__Bacteria;p__Acidobacteria;c__Subgroup_9;o__uncultured_bacterium;f__<empty>;g__	0.000868359
k__Bacteria;p__Chloroflexi;c__Dehalococcoidia;o__SPG12-343-353-B75;f__uncultured_bacterium;g__<empty>	0.000858378
k__Bacteria;p__Fibrobacteres;c__Fibrobacteria;o__Fibrobacterales;f__TG3;g__uncultured_bacterium	0.000858378
k__Bacteria;p__Acidobacteria;c__Subgroup_22;o__;f__;g__	0.000848397
k__Bacteria;p__Patescibacteria;c__Gracilibacteria;o__;f__;g__	0.000848397
k__Bacteria;p__Elusimicrobia;c__Elusimicrobia;o__MD2894-B20;f__uncultured_bacterium;g__<empty>	0.000838415
k__Bacteria;p__Planctomycetes;c__vadinHA49;o__uncultured_bacterium;f__<empty>;g__<empty>	0.000838415
k__Bacteria;p__Poribacteria;c__uncultured_bacterium;o__<empty>;f__<empty>;g__<empty>	0.000828434
k__Bacteria;p__Elusimicrobia;c__Elusimicrobia;o__Lineage_IV;f__uncultured_bacterium;g__<empty>	0.000818453
k__Bacteria;p__Chloroflexi;c__Dehalococcoidia;o__H3.93;f__uncultured_bacterium;g__<empty>	0.000808472
k__Bacteria;p__Spirochaetes;c__Spirochaetia;o__Spirochaetales;f__Spirochaetaceae;g__	0.000808472
k__Bacteria;p__Elusimicrobia;c__4-29;o__uncultured_bacterium;f__<empty>;g__	0.000798491
k__Bacteria;p__Planctomycetes;c__Phycisphaerae;o__Pla1_lineage;f__uncultured_bacterium;g__<empty>	0.000798491
k__Bacteria;p__Nitrospirae;c__;o__;f__;g__	0.00078851
k__Bacteria;p__Hydrogenedentes;c__Hydrogenedentia;o__Hydrogenedentiales;f__Hydrogenedensaceae;g__uncultured_bacterium	0.000778529
k__Bacteria;p__Planctomycetes;c__SPG12-343-353-B69;o__uncultured_bacterium;f__<empty>;g__<empty>	0.000778529
k__Bacteria;p__Proteobacteria;c__Deltaproteobacteria;o__Myxococcales;f__bacteriap25;g__	0.000768547
k__Bacteria;p__Patescibacteria;c__Gracilibacteria;o__uncultured_marine_bacterium;f__<empty>;g__<empty>	0.000758566
k__Bacteria;p__Calditrichaeota;c__Calditrichia;o__Calditrichales;f__Calditrichaceae;g__SM23-31	0.000748585
k__Bacteria;p__Cloacimonetes;c__Cloacimonadia;o__Cloacimonadales;f__MSBL8;g__	0.000748585
k__Bacteria;p__Chlamydiae;c__Chlamydiae;o__Chlamydiales;f__Simkaniaceae;g__	0.000738604
k__Bacteria;p__Acidobacteria;c__Aminicenantia;o__Aminicenantales;f__uncultured_Aminicenantes_bacterium;g__<empty>	0.000728623
k__Bacteria;p__Proteobacteria;c__Deltaproteobacteria;o__Desulfobacterales;f__Desulfobacteraceae;g__	0.000728623
k__Bacteria;p__Aerophobetes;c__;o__;f__;g__	0.000718642
k__Bacteria;p__Proteobacteria;c__Deltaproteobacteria;o__;f__;g__	0.000718642
k__Bacteria;p__Chloroflexi;c__Dehalococcoidia;o__FW22;f__uncultured_organism;g__<empty>	0.000708661
k__Bacteria;p__Proteobacteria;c__Gammaproteobacteria;o__Xanthomonadales;f__Xanthomonadaceae;g__Stenotrophomonas	0.000708661
k__Archaea;p__Diapherotrites;c__Micrarchaeia;o__uncultured_euryarchaeote;f__<empty>;g__	0.000698679
k__Bacteria;p__Patescibacteria;c__Microgenomatia;o__Candidatus_Woesebacteria;f__uncultured_bacterium;g__	0.000698679
k__Bacteria;p__Nitrospirae;c__Thermodesulfovibrionia;o__uncultured;f__uncultured_bacterium;g__<empty>	0.000688698
k__Bacteria;p__Patescibacteria;c__Parcubacteria;o__GWA2-38-13b;f__uncultured_bacterium;g__<empty>	0.000688698
k__Archaea;p__Altiarchaeota;c__Altiarchaeia;o__uncultured_archaeon;f__<empty>;g__	0.000678717
k__Bacteria;p__Latescibacteria;c__Latescibacteria;o__Latescibacterales;f__Latescibacteraceae;g__	0.000668736
k__Bacteria;p__Patescibacteria;c__Gracilibacteria;o__uncultured_bacterium;f__<empty>;g__<empty>	0.000668736
k__Bacteria;p__Patescibacteria;c__Parcubacteria;o__Candidatus_Yanofskybacteria;f__uncultured_bacterium;g__	0.000658755
k__Bacteria;p__Proteobacteria;c__Deltaproteobacteria;o__Sva0485;f__uncultured_delta_proteobacterium;g__<empty>	0.000638793
k__Bacteria;p__Patescibacteria;c__Parcubacteria;o__Candidatus_Nealsonbacteria;f__uncultured_bacterium;g__<empty>	0.00061883
k__Bacteria;p__WS1;c__uncultured_bacterium;o__<empty>;f__<empty>;g__	0.00061883
k__Archaea;p__Nanoarchaeaeota;c__Nanohaloarchaeia;o__Aenigmarchaeales;f__uncultured_archaeon;g__	0.000608849
k__Bacteria;p__Chlamydiae;c__LD1-PA32;o__uncultured_bacterium;f__<empty>;g__<empty>	0.000608849
k__Bacteria;p__Elusimicrobia;c__Lineage_IIb;o__uncultured_bacterium;f__<empty>;g__	0.000608849
k__Bacteria;p__Planctomycetes;c__Phycisphaerae;o__CCM11a;f__uncultured_planctomycete;g__	0.000608849
k__Bacteria;p__Firmicutes;c__Bacilli;o__Bacillales;f__;g__	0.000598868
k__Bacteria;p__Planctomycetes;c__Planctomycetacia;o__Planctomycetales;f__Rubinisphaeraceae;g__Planctomicrobium	0.000598868
k__Bacteria;p__Planctomycetes;c__Phycisphaerae;o__Phycisphaerales;f__Phycisphaeraceae;g__CL500-3	0.000588887
k__Bacteria;p__Acetothermia;c__Acetothermiia;o__uncultured_organism;f__<empty>;g__<empty>	0.000568925
k__Bacteria;p__Patescibacteria;c__Gracilibacteria;o__uncultured_organism;f__<empty>;g__<empty>	0.000568925
k__Bacteria;p__Acidobacteria;c__;o__;f__;g__	0.000548962
k__Bacteria;p__Chloroflexi;c__Anaerolineae;o__Anaerolineales;f__Anaerolineaceae;g__Longilinea	0.000538981
k__Bacteria;p__Chlamydiae;c__LD1-PA32;o__metagenome;f__<empty>;g__	0.000529
k__Bacteria;p__GN01;c__uncultured_bacterium;o__<empty>;f__<empty>;g__<empty>	0.000529
k__Bacteria;p__Proteobacteria;c__Deltaproteobacteria;o__Desulfobacterales;f__Desulfobacteraceae;g__Desulfococcus	0.000529
k__Bacteria;p__Spirochaetes;c__Spirochaetia;o__Spirochaetales;f__Spirochaetaceae;g__Sediminispirochaeta	0.000529
k__Bacteria;p__Patescibacteria;c__Gracilibacteria;o__Candidatus_Peribacteria;f__uncultured_bacterium;g__<empty>	0.000509038
k__Bacteria;p__Proteobacteria;c__Deltaproteobacteria;o__Myxococcales;f__PS-B29;g__uncultured_delta_proteobacterium	0.000509038
k__Bacteria;p__Zixibacteria;c__uncultured_candidate_division_TA06_bacterium;o__<empty>;f__<empty>;g__<empty>	0.000509038
k__Bacteria;p__Omnitrophicaeota;c__uncultured_Latescibacteria_bacterium;o__<empty>;f__<empty>;g__<empty>	0.000499057
k__Bacteria;p__Planctomycetes;c__Phycisphaerae;o__MSBL9;f__L21-RPul-D3;g__uncultured_bacterium	0.000499057
k__Archaea;p__Nanoarchaeaeota;c__Woesearchaeia;o__metagenome;f__<empty>;g__	0.000479095
k__Bacteria;p__Omnitrophicaeota;c__Omnitrophia;o__uncultured_bacterium;f__<empty>;g__<empty>	0.000479095
k__Bacteria;p__Planctomycetes;c__Planctomycetacia;o__Pirellulales;f__Pirellulaceae;g__Bythopirellula	0.000479095
k__Bacteria;p__Poribacteria;c__uncultured_Firmicutes_bacterium;o__<empty>;f__<empty>;g__<empty>	0.000479095
k__Archaea;p__Euryarchaeota;c__Thermoplasmata;o__SG8-5;f__uncultured_archaeon;g__<empty>	0.000469113
k__Bacteria;p__Planctomycetes;c__vadinHA49;o__uncultured_bacterium;f__<empty>;g__	0.000469113
k__Bacteria;p__Actinobacteria;c__RBG-16-55-12;o__;f__;g__	0.000459132
k__Bacteria;p__Chloroflexi;c__Anaerolineae;o__SBR1031;f__;g__	0.000459132
k__Bacteria;p__Chloroflexi;c__Dehalococcoidia;o__Sh765B-AG-111;f__uncultured_bacterium;g__	0.000459132
k__Bacteria;p__Armatimonadetes;c__DG-56;o__uncultured_bacterium;f__<empty>;g__<empty>	0.000449151
k__Bacteria;p__Poribacteria;c__uncultured_bacterium;o__<empty>;f__<empty>;g__	0.000449151
k__Bacteria;p__Proteobacteria;c__Deltaproteobacteria;o__Oligoflexales;f__0319-6G20;g__	0.000449151
k__Bacteria;p__BRC1;c__uncultured_organism;o__<empty>;f__<empty>;g__<empty>	0.00043917
k__Bacteria;p__Chloroflexi;c__Dehalococcoidia;o__3051bac4-16;f__uncultured_bacterium;g__<empty>	0.00043917
k__Bacteria;p__Dependentiae;c__Babeliae;o__Babeliales;f__Vermiphilaceae;g__	0.00043917
k__Bacteria;p__Kiritimatiellaeota;c__Kiritimatiellae;o__WCHB1-41;f__uncultured_Verrucomicrobia_bacterium;g__<empty>	0.00043917
k__Bacteria;p__Atribacteria;c__JS1;o__;f__;g__	0.000429189
k__Bacteria;p__BRC1;c__uncultured_organism;o__<empty>;f__<empty>;g__	0.000429189
k__Bacteria;p__Kiritimatiellaeota;c__Kiritimatiellae;o__WCHB1-41;f__uncultured_prokaryote;g__<empty>	0.000429189
k__Bacteria;p__Patescibacteria;c__Parcubacteria;o__uncultured_bacterium;f__<empty>;g__<empty>	0.000429189
k__Bacteria;p__Proteobacteria;c__Deltaproteobacteria;o__MBNT15;f__uncultured_delta_proteobacterium;g__<empty>	0.000429189
k__Bacteria;p__Proteobacteria;c__Deltaproteobacteria;o__Myxococcales;f__MidBa8;g__uncultured_organism	0.000429189
k__Bacteria;p__Proteobacteria;c__Gammaproteobacteria;o__Alteromonadales;f__Psychromonadaceae;g__Psychromonas	0.000429189
k__Bacteria;p__Chloroflexi;c__Anaerolineae;o__uncultured;f__uncultured_bacterium;g__<empty>	0.000419208
k__Bacteria;p__Proteobacteria;c__Deltaproteobacteria;o__Desulfobacterales;f__Desulfobacteraceae;g__Desulfatirhabdium	0.000419208
k__Bacteria;p__Zixibacteria;c__;o__;f__;g__	0.000419208
k__Bacteria;p__Acidobacteria;c__Aminicenantia;o__Aminicenantales;f__;g__	0.000409227
k__Bacteria;p__Kiritimatiellaeota;c__Kiritimatiellae;o__WCHB1-41;f__uncultured_Kiritimatiellaeota_bacterium;g__<empty>	0.000409227
k__Archaea;p__Thaumarchaeota;c__Nitrososphaeria;o__Nitrososphaerales;f__Nitrososphaeraceae;g__uncultured_archaeon	0.000399245
k__Bacteria;p__Bacteroidetes;c__Bacteroidia;o__Bacteroidales;f__SB-5;g__uncultured_bacterium	0.000399245
k__Bacteria;p__Patescibacteria;c__Parcubacteria;o__Candidatus_Yanofskybacteria;f__marine_sediment_metagenome;g__	0.000399245
k__Bacteria;p__Planctomycetes;c__Phycisphaerae;o__CCM11a;f__;g__	0.000399245
k__Bacteria;p__Proteobacteria;c__Deltaproteobacteria;o__Desulfuromonadales;f__Desulfuromonadaceae;g__Pelobacter	0.000389264
k__Bacteria;p__Fibrobacteres;c__Fibrobacteria;o__Fibrobacterales;f__TG3;g__uncultured_Chitinivibrionia_bacterium	0.000379283
k__Bacteria;p__Planctomycetes;c__Planctomycetacia;o__Planctomycetales;f__Rubinisphaeraceae;g__uncultured	0.000369302
k__Bacteria;p__Proteobacteria;c__Alphaproteobacteria;o__Paracaedibacterales;f__Paracaedibacteraceae;g__uncultured	0.000369302
k__Bacteria;p__Proteobacteria;c__Deltaproteobacteria;o__Myxococcales;f__VHS-B3-70;g__uncultured_delta_proteobacterium	0.000369302
k__Bacteria;p__TA06;c__uncultured_bacterium;o__<empty>;f__<empty>;g__<empty>	0.000369302
k__Bacteria;p__Poribacteria;c__uncultured_Firmicutes_bacterium;o__<empty>;f__<empty>;g__	0.000359321
k__Bacteria;p__Proteobacteria;c__Deltaproteobacteria;o__Desulfobacterales;f__Desulfobacteraceae;g__Sva0081_sediment_group	0.000359321
k__Bacteria;p__Actinobacteria;c__Thermoleophilia;o__Gaiellales;f__uncultured;g__uncultured_bacterium	0.00034934
k__Bacteria;p__Chloroflexi;c__Dehalococcoidia;o__GIF9;f__AB-539-J10;g__uncultured_marine_bacterium	0.00034934
k__Bacteria;p__Planctomycetes;c__Phycisphaerae;o__Phycisphaerales;f__Phycisphaeraceae;g__uncultured	0.00034934
k__Bacteria;p__Planctomycetes;c__Phycisphaerae;o__Pla1_lineage;f__uncultured_organism;g__<empty>	0.00034934
k__Bacteria;p__Planctomycetes;c__Phycisphaerae;o__S-70;f__uncultured_bacterium;g__	0.00034934
k__Bacteria;p__Proteobacteria;c__Alphaproteobacteria;o__Rickettsiales;f__Mitochondria;g__uncultured_bacterium	0.00034934
k__Bacteria;p__Bacteroidetes;c__Ignavibacteria;o__Ignavibacteriales;f__Melioribacteraceae;g__IheB3-7	0.000339359
k__Bacteria;p__Cyanobacteria;c__Oxyphotobacteria;o__Nostocales;f__Microcystaceae;g__Atelocyanobacterium_(UCYN-A)	0.000339359
k__Bacteria;p__Gemmatimonadetes;c__MD2902-B12;o__uncultured_bacterium;f__<empty>;g__<empty>	0.000339359
k__Bacteria;p__Planctomycetes;c__Phycisphaerae;o__Phycisphaerales;f__AKAU3564_sediment_group;g__uncultured_organism	0.000339359
k__Archaea;p__Thaumarchaeota;c__Nitrososphaeria;o__Nitrososphaerales;f__Nitrososphaeraceae;g__	0.000329377
k__Bacteria;p__Armatimonadetes;c__uncultured;o__uncultured_bacterium;f__<empty>;g__<empty>	0.000329377
k__Bacteria;p__Chloroflexi;c__;o__;f__;g__	0.000329377
k__Bacteria;p__Bacteroidetes;c__Bacteroidia;o__Chitinophagales;f__Saprospiraceae;g__Lewinella	0.000319396
k__Bacteria;p__Chloroflexi;c__Anaerolineae;o__;f__;g__	0.000319396
k__Bacteria;p__Chloroflexi;c__Dehalococcoidia;o__S085;f__uncultured_bacterium;g__<empty>	0.000319396
k__Bacteria;p__Patescibacteria;c__Parcubacteria;o__;f__;g__	0.000319396
k__Bacteria;p__Planctomycetes;c__Phycisphaerae;o__DG-20;f__uncultured_organism;g__<empty>	0.000319396
k__Bacteria;p__Cyanobacteria;c__Oxyphotobacteria;o__Synechococcales;f__Cyanobiaceae;g__	0.000309415
k__Bacteria;p__Fibrobacteres;c__Fibrobacteria;o__Fibrobacterales;f__TG3;g__	0.000309415
k__Archaea;p__Euryarchaeota;c__Methanomicrobia;o__ANME-1;f__ANME-1b;g__uncultured_archaeon	0.000299434
k__Bacteria;p__Acidobacteria;c__Subgroup_22;o__uncultured_deep-sea_bacterium;f__<empty>;g__	0.000299434
k__Bacteria;p__Actinobacteria;c__Actinobacteria;o__PeM15;f__;g__	0.000299434
k__Bacteria;p__Chloroflexi;c__Anaerolineae;o__MSB-5B2;f__uncultured_bacterium;g__<empty>	0.000299434
k__Bacteria;p__Gemmatimonadetes;c__BD2-11_terrestrial_group;o__uncultured_bacterium;f__<empty>;g__<empty>	0.000299434
k__Bacteria;p__Hydrogenedentes;c__Hydrogenedentia;o__Hydrogenedentiales;f__Hydrogenedensaceae;g__	0.000299434
k__Bacteria;p__LCP-89;c__;o__;f__;g__	0.000299434
k__Bacteria;p__Planctomycetes;c__Phycisphaerae;o__MSBL9;f__KCLunmb-38-53;g__	0.000299434
k__Bacteria;p__Poribacteria;c__;o__;f__;g__	0.000299434
k__Archaea;p__Nanoarchaeaeota;c__Woesearchaeia;o__uncultured_archaeon;f__<empty>;g__<empty>	0.000289453
k__Bacteria;p__Aerophobetes;c__uncultured_bacterium;o__<empty>;f__<empty>;g__	0.000289453
k__Bacteria;p__Actinobacteria;c__WCHB1-81;o__uncultured_actinobacterium;f__<empty>;g__<empty>	0.000279472
k__Bacteria;p__CK-2C2-2;c__uncultured_bacterium;o__<empty>;f__<empty>;g__	0.000279472
k__Bacteria;p__Cloacimonetes;c__Cloacimonadia;o__Cloacimonadales;f__NK-L14;g__uncultured_bacterium	0.000279472
k__Bacteria;p__Omnitrophicaeota;c__Omnitrophia;o__Omnitrophales;f__Omnitrophaceae;g__Candidatus_Omnitrophus	0.000279472
k__Bacteria;p__PAUC34f;c__uncultured_bacterium;o__<empty>;f__<empty>;g__	0.000279472
k__Bacteria;p__Planctomycetes;c__Pla3_lineage;o__uncultured_planctomycete;f__<empty>;g__<empty>	0.000279472
k__Bacteria;p__Proteobacteria;c__Gammaproteobacteria;o__Coxiellales;f__Coxiellaceae;g__Coxiella	0.000279472
k__Archaea;p__Euryarchaeota;c__Thermoplasmata;o__SG8-5;f__uncultured_Thermoplasmatales_archaeon;g__<empty>	0.000269491
k__Archaea;p__Nanoarchaeaeota;c__Woesearchaeia;o__Candidatus_Diapherotrites_archaeon_ADurb.Bin253;f__<empty>;g__	0.000269491
k__Bacteria;p__Chlamydiae;c__LD1-PA32;o__metagenome;f__<empty>;g__<empty>	0.000269491
k__Bacteria;p__Chloroflexi;c__Anaerolineae;o__RBG-13-54-9;f__uncultured_bacterium;g__<empty>	0.000269491
k__Bacteria;p__Elusimicrobia;c__Elusimicrobia;o__MD2894-B20;f__uncultured_bacterium;g__	0.000269491
k__Bacteria;p__Patescibacteria;c__WWE3;o__uncultured_bacterium;f__<empty>;g__	0.000269491
k__Bacteria;p__Bacteroidetes;c__Bacteroidia;o__Cytophagales;f__Amoebophilaceae;g__Candidatus_Amoebophilus	0.00025951
k__Bacteria;p__Dependentiae;c__Babeliae;o__Babeliales;f__UBA12411;g__	0.00025951
k__Bacteria;p__Omnitrophicaeota;c__uncultured_organism;o__<empty>;f__<empty>;g__<empty>	0.00025951
k__Bacteria;p__Planctomycetes;c__Pla4_lineage;o__uncultured_organism;f__<empty>;g__	0.00025951
k__Bacteria;p__Spirochaetes;c__Leptospirae;o__Leptospirales;f__Leptospiraceae;g__RBG-16-49-21	0.00025951
k__Archaea;p__Nanoarchaeaeota;c__Nanohaloarchaeia;o__Deep_Sea_Euryarchaeotic_Group(DSEG);f__uncultured_archaeon;g__<empty>	0.000249528
k__Archaea;p__Nanoarchaeaeota;c__Nanohaloarchaeia;o__Deep_Sea_Euryarchaeotic_Group(DSEG);f__uncultured_euryarchaeote;g__	0.000249528
k__Bacteria;p__Acidobacteria;c__Aminicenantia;o__Aminicenantales;f__uncultured_Aminicenantes_bacterium;g__	0.000249528
k__Bacteria;p__Proteobacteria;c__Deltaproteobacteria;o__FW113;f__uncultured_organism;g__<empty>	0.000249528
k__Bacteria;p__Proteobacteria;c__Deltaproteobacteria;o__MBNT15;f__uncultured_organism;g__<empty>	0.000249528
k__Bacteria;p__TA06;c__;o__;f__;g__	0.000249528
k__Bacteria;p__WS2;c__uncultured_microorganism;o__<empty>;f__<empty>;g__	0.000249528
k__Archaea;p__Euryarchaeota;c__Thermoplasmata;o__Methanomassiliicoccales;f__uncultured;g__uncultured_Thermoplasmatales_archaeon	0.000239547
k__Archaea;p__Thaumarchaeota;c__Nitrososphaeria;o__Nitrososphaerales;f__Nitrososphaeraceae;g__Candidatus_Nitrososphaera	0.000239547
k__Bacteria;p__Kiritimatiellaeota;c__Kiritimatiellae;o__Kiritimatiellales;f__Kiritimatiellaceae;g__R76-B128	0.000239547
k__Bacteria;p__Latescibacteria;c__uncultured_bacterium;o__<empty>;f__<empty>;g__	0.000239547
k__Bacteria;p__Patescibacteria;c__Parcubacteria;o__GWA2-38-13b;f__uncultured_bacterium;g__	0.000229566
k__Bacteria;p__Planctomycetes;c__Phycisphaerae;o__mle1-8;f__uncultured_bacterium;g__	0.000229566
k__Bacteria;p__Proteobacteria;c__Deltaproteobacteria;o__Myxococcales;f__VHS-B3-70;g__uncultured_bacterium	0.000229566
k__Archaea;p__Diapherotrites;c__Iainarchaeia;o__Iainarchaeales;f__Iainarchaeaceae;g__	0.000219585
k__Archaea;p__Diapherotrites;c__Micrarchaeia;o__;f__;g__	0.000219585
k__Bacteria;p__Dependentiae;c__Babeliae;o__Babeliales;f__UBA12409;g__	0.000219585
k__Bacteria;p__Latescibacteria;c__uncultured_Latescibacteria_bacterium;o__<empty>;f__<empty>;g__	0.000219585
k__Bacteria;p__Planctomycetes;c__Planctomycetacia;o__Pirellulales;f__Pirellulaceae;g__Rubripirellula	0.000219585
k__Bacteria;p__Verrucomicrobia;c__Verrucomicrobiae;o__Chthoniobacterales;f__Chthoniobacteraceae;g__LD29	0.000219585
k__Archaea;p__Nanoarchaeaeota;c__Nanohaloarchaeia;o__Deep_Sea_Euryarchaeotic_Group(DSEG);f__uncultured_archaeon;g__	0.000209604
k__Bacteria;p__Acidobacteria;c__Acidobacteriia;o__Solibacterales;f__Solibacteraceae_(Subgroup_3);g__uncultured_Acidobacterium_sp.	0.000209604
k__Bacteria;p__Firmicutes;c__Clostridia;o__Clostridiales;f__Clostridiaceae;g__Anaeromicrobium	0.000209604
k__Bacteria;p__Patescibacteria;c__Berkelbacteria;o__Candidatus_Berkelbacteria_bacterium_RIFOXYA2_FULL_43_10;f__<empty>;g__	0.000209604
k__Bacteria;p__Acidobacteria;c__Subgroup_21;o__uncultured_bacterium;f__<empty>;g__<empty>	0.000199623
k__Bacteria;p__Chloroflexi;c__Anaerolineae;o__uncultured;f__uncultured_bacterium;g__	0.000199623
k__Bacteria;p__Firmicutes;c__Clostridia;o__Clostridiales;f__Clostridiaceae_1;g__Clostridium_sensu_stricto_1	0.000199623
k__Bacteria;p__Patescibacteria;c__Gracilibacteria;o__Candidatus_Peribacteria;f__uncultured_bacterium;g__	0.000199623
k__Bacteria;p__Planctomycetes;c__Phycisphaerae;o__DG-20;f__uncultured_bacterium;g__	0.000199623
k__Bacteria;p__Planctomycetes;c__Planctomycetacia;o__Planctomycetales;f__Gimesiaceae;g__uncultured	0.000199623
k__Bacteria;p__Proteobacteria;c__Deltaproteobacteria;o__Desulfovibrionales;f__Desulfovibrionaceae;g__Halodesulfovibrio	0.000199623
k__Bacteria;p__Proteobacteria;c__Deltaproteobacteria;o__NKB15;f__uncultured_bacterium;g__<empty>	0.000199623
k__Archaea;p__Euryarchaeota;c__Thermococci;o__Methanofastidiosales;f__uncultured;g__uncultured_archaeon	0.000189642
k__Archaea;p__Thaumarchaeota;c__Nitrososphaeria;o__Nitrososphaerales;f__Nitrososphaeraceae;g__Candidatus_Nitrocosmicus	0.000189642
k__Bacteria;p__BRC1;c__uncultured_delta_proteobacterium;o__<empty>;f__<empty>;g__	0.000189642
k__Bacteria;p__Bacteroidetes;c__Bacteroidia;o__Bacteroidales;f__Bacteroidetes_vadinHA17;g__	0.000189642
k__Bacteria;p__Bacteroidetes;c__Bacteroidia;o__Bacteroidales;f__Marinifilaceae;g__Marinifilum	0.000189642
k__Bacteria;p__Firmicutes;c__Erysipelotrichia;o__Erysipelotrichales;f__Erysipelotrichaceae;g__Turicibacter	0.000189642
k__Bacteria;p__Patescibacteria;c__Microgenomatia;o__Candidatus_Beckwithbacteria;f__metagenome;g__<empty>	0.000189642
k__Bacteria;p__Planctomycetes;c__Planctomycetacia;o__Planctomycetales;f__uncultured;g__uncultured_bacterium	0.000189642
k__Bacteria;p__Proteobacteria;c__Deltaproteobacteria;o__Myxococcales;f__MidBa8;g__uncultured_delta_proteobacterium	0.000189642
k__Bacteria;p__Proteobacteria;c__Gammaproteobacteria;o__Diplorickettsiales;f__Diplorickettsiaceae;g__	0.000189642
k__Bacteria;p__Zixibacteria;c__uncultured_Caldithrix_sp.;o__<empty>;f__<empty>;g__<empty>	0.000189642
k__Bacteria;p__Actinobacteria;c__Actinobacteria;o__Corynebacteriales;f__Mycobacteriaceae;g__Mycobacterium	0.00017966
k__Bacteria;p__Chloroflexi;c__Dehalococcoidia;o__MSBL5;f__;g__	0.00017966
k__Bacteria;p__Dependentiae;c__Babeliae;o__Babeliales;f__;g__	0.00017966
k__Bacteria;p__Dependentiae;c__Babeliae;o__Babeliales;f__Babeliaceae;g__	0.00017966
k__Bacteria;p__Firmicutes;c__Clostridia;o__Clostridiales;f__Family_XII;g__Fusibacter	0.00017966
k__Bacteria;p__Patescibacteria;c__Berkelbacteria;o__uncultured_bacterium;f__<empty>;g__	0.00017966
k__Bacteria;p__Planctomycetes;c__Phycisphaerae;o__CCM11a;f__uncultured_bacterium;g__	0.00017966
k__Bacteria;p__Planctomycetes;c__Phycisphaerae;o__MSBL9;f__ST-NAGAB-D1;g__	0.00017966
k__Bacteria;p__Proteobacteria;c__Deltaproteobacteria;o__Desulfuromonadales;f__Geobacteraceae;g__	0.00017966
k__Bacteria;p__Proteobacteria;c__Deltaproteobacteria;o__Myxococcales;f__MidBa8;g__uncultured_bacterium	0.00017966
k__Bacteria;p__Acidobacteria;c__Subgroup_22;o__uncultured_bacterium;f__<empty>;g__	0.000169679
k__Bacteria;p__Bacteroidetes;c__Bacteroidia;o__Chitinophagales;f__Saprospiraceae;g__uncultured	0.000169679
k__Bacteria;p__Chloroflexi;c__Dehalococcoidia;o__MSBL5;f__uncultured_Dehalococcoides_sp.;g__<empty>	0.000169679
k__Bacteria;p__Chloroflexi;c__Dehalococcoidia;o__SPG12-461-471-B8;f__uncultured_bacterium;g__<empty>	0.000169679
k__Bacteria;p__Patescibacteria;c__ABY1;o__Candidatus_Falkowbacteria;f__uncultured_bacterium;g__	0.000169679
k__Bacteria;p__Patescibacteria;c__Parcubacteria;o__Candidatus_Yanofskybacteria;f__uncultured_bacterium;g__<empty>	0.000169679
k__Bacteria;p__Planctomycetes;c__Phycisphaerae;o__DG-20;f__Planctomycetes_bacterium_DG_20;g__<empty>	0.000169679
k__Bacteria;p__Bacteroidetes;c__Bacteroidia;o__Sphingobacteriales;f__Lentimicrobiaceae;g__	0.000159698
k__Bacteria;p__Chloroflexi;c__Anaerolineae;o__RBG-13-54-9;f__;g__	0.000159698
k__Bacteria;p__Cyanobacteria;c__Oxyphotobacteria;o__Chloroplast;f__Chaetoceros_calcitrans;g__<empty>	0.000159698
k__Bacteria;p__Elusimicrobia;c__Lineage_IIa;o__uncultured_bacterium;f__<empty>;g__	0.000159698
k__Bacteria;p__FCPU426;c__uncultured_bacterium;o__<empty>;f__<empty>;g__	0.000159698
k__Bacteria;p__Fibrobacteres;c__Fibrobacteria;o__Fibrobacterales;f__uncultured_bacterium;g__	0.000159698
k__Bacteria;p__Patescibacteria;c__ABY1;o__Candidatus_Falkowbacteria;f__Candidatus_Falkowbacteria_bacterium_GW2011_GWA2_41_14;g__	0.000159698
k__Bacteria;p__Planctomycetes;c__OM190;o__uncultured_bacterium;f__<empty>;g__<empty>	0.000159698
k__Bacteria;p__Proteobacteria;c__Deltaproteobacteria;o__Desulfobacterales;f__Desulfobacteraceae;g__Desulfobacterium	0.000159698
k__Bacteria;p__Proteobacteria;c__Gammaproteobacteria;o__Cellvibrionales;f__Halieaceae;g__OM60(NOR5)_clade	0.000159698
k__Bacteria;p__Chlamydiae;c__Chlamydiae;o__Chlamydiales;f__Simkaniaceae;g__Candidatus_Fritschea	0.000149717
k__Bacteria;p__Chloroflexi;c__Anaerolineae;o__ADurb.Bin180;f__uncultured_organism;g__	0.000149717
k__Bacteria;p__Dependentiae;c__Babeliae;o__Babeliales;f__bacterium_enrichment_culture_clone_46;g__<empty>	0.000149717
k__Bacteria;p__Firmicutes;c__Clostridia;o__Clostridiales;f__Lachnospiraceae;g__uncultured	0.000149717
k__Bacteria;p__Firmicutes;c__Clostridia;o__Clostridiales;f__Peptostreptococcaceae;g__Romboutsia	0.000149717
k__Bacteria;p__Patescibacteria;c__ABY1;o__Candidatus_Falkowbacteria;f__marine_metagenome;g__	0.000149717
k__Bacteria;p__Planctomycetes;c__Phycisphaerae;o__Amsterdam-1B-07;f__uncultured_bacterium;g__	0.000149717
k__Bacteria;p__Proteobacteria;c__Alphaproteobacteria;o__Rhizobiales;f__Hyphomicrobiaceae;g__Filomicrobium	0.000149717
k__Bacteria;p__Proteobacteria;c__Deltaproteobacteria;o__MBNT15;f__uncultured_bacterium;g__	0.000149717
k__Bacteria;p__Proteobacteria;c__Deltaproteobacteria;o__MBNT15;f__uncultured_organism;g__	0.000149717
k__Archaea;p__Crenarchaeota;c__Bathyarchaeia;o__;f__;g__	0.000139736
k__Archaea;p__Euryarchaeota;c__Thermoplasmata;o__Marine_Benthic_Group_D_and_DHVEG-1;f__uncultured_archaeon;g__	0.000139736
k__Bacteria;p__Actinobacteria;c__Actinobacteria;o__Micrococcales;f__Micrococcaceae;g__	0.000139736
k__Bacteria;p__Actinobacteria;c__Actinobacteria;o__PeM15;f__uncultured_actinobacterium;g__<empty>	0.000139736
k__Bacteria;p__Bacteroidetes;c__Bacteroidia;o__Bacteroidales;f__;g__	0.000139736
k__Bacteria;p__Chloroflexi;c__Dehalococcoidia;o__MB-C2-126;f__uncultured_bacterium;g__<empty>	0.000139736
k__Bacteria;p__Elusimicrobia;c__Endomicrobia;o__Endomicrobiales;f__Endomicrobiaceae;g__	0.000139736
k__Bacteria;p__Gemmatimonadetes;c__MD2902-B12;o__uncultured_microorganism;f__<empty>;g__<empty>	0.000139736
k__Bacteria;p__Patescibacteria;c__ABY1;o__Candidatus_Kerfeldbacteria;f__uncultured_bacterium;g__	0.000139736
k__Bacteria;p__Patescibacteria;c__Microgenomatia;o__;f__;g__	0.000139736
k__Bacteria;p__Patescibacteria;c__Microgenomatia;o__uncultured_bacterium;f__<empty>;g__	0.000139736
k__Bacteria;p__Planctomycetes;c__Phycisphaerae;o__MSBL9;f__SM23-30;g__uncultured_organism	0.000139736
k__Bacteria;p__Planctomycetes;c__Phycisphaerae;o__Phycisphaerales;f__AKAU3564_sediment_group;g__uncultured_planctomycete	0.000139736
k__Bacteria;p__Proteobacteria;c__Deltaproteobacteria;o__Desulfobacterales;f__Desulfobulbaceae;g__	0.000139736
k__Bacteria;p__Proteobacteria;c__Deltaproteobacteria;o__Desulfovibrionales;f__Desulfovibrionaceae;g__	0.000139736
k__Bacteria;p__Proteobacteria;c__Deltaproteobacteria;o__Myxococcales;f__VHS-B4-70;g__uncultured_delta_proteobacterium	0.000139736
k__Archaea;p__Euryarchaeota;c__Thermoplasmata;o__Marine_Benthic_Group_D_and_DHVEG-1;f__uncultured_euryarchaeote;g__<empty>	0.000129755
k__Bacteria;p__BHI80-139;c__uncultured_bacterium;o__<empty>;f__<empty>;g__	0.000129755
k__Bacteria;p__Bacteroidetes;c__Bacteroidia;o__Bacteroidales;f__Marinilabiliaceae;g__Carboxylicivirga	0.000129755
k__Bacteria;p__Chloroflexi;c__Anaerolineae;o__SBR1031;f__uncultured_Chloroflexi_bacterium;g__	0.000129755
k__Bacteria;p__Chloroflexi;c__Anaerolineae;o__uncultured;f__uncultured_sediment_bacterium;g__<empty>	0.000129755
k__Bacteria;p__Chloroflexi;c__Dehalococcoidia;o__GIF3;f__uncultured_bacterium;g__	0.000129755
k__Bacteria;p__Firmicutes;c__Clostridia;o__Clostridiales;f__Clostridiales_vadinBB60_group;g__uncultured_bacterium	0.000129755
k__Bacteria;p__LCP-89;c__uncultured_Deferribacteres_bacterium;o__<empty>;f__<empty>;g__	0.000129755
k__Bacteria;p__Planctomycetes;c__Phycisphaerae;o__Phycisphaerales;f__Phycisphaeraceae;g__FS140-16B-02_marine_group	0.000129755
k__Bacteria;p__Planctomycetes;c__Pla3_lineage;o__uncultured_organism;f__<empty>;g__	0.000129755
k__Bacteria;p__Planctomycetes;c__Pla4_lineage;o__uncultured_bacterium;f__<empty>;g__<empty>	0.000129755
k__Bacteria;p__Proteobacteria;c__Alphaproteobacteria;o__Rhodobacterales;f__Rhodobacteraceae;g__	0.000129755
k__Bacteria;p__Proteobacteria;c__Deltaproteobacteria;o__Myxococcales;f__PS-B29;g__	0.000129755
k__Bacteria;p__Verrucomicrobia;c__Verrucomicrobiae;o__Opitutales;f__Puniceicoccaceae;g__Lentimonas	0.000129755
k__Archaea;p__Crenarchaeota;c__;o__;f__;g__	0.000119774
k__Archaea;p__Nanoarchaeaeota;c__Woesearchaeia;o__Candidatus_Staskawiczbacteria_bacterium_RIFCSPHIGHO2_01_FULL_34_27;f__<empty>;g__	0.000119774
k__Bacteria;p__Bacteroidetes;c__Bacteroidia;o__;f__;g__	0.000119774
k__Bacteria;p__Bacteroidetes;c__Bacteroidia;o__Flavobacteriales;f__Flavobacteriaceae;g__Lutibacter	0.000119774
k__Bacteria;p__Bacteroidetes;c__Bacteroidia;o__Flavobacteriales;f__Flavobacteriaceae;g__Lutimonas	0.000119774
k__Bacteria;p__Bacteroidetes;c__Bacteroidia;o__Sphingobacteriales;f__Lentimicrobiaceae;g__uncultured_Bacteroidetes_bacterium	0.000119774
k__Bacteria;p__Chloroflexi;c__Dehalococcoidia;o__Sh765B-AG-111;f__;g__	0.000119774
k__Bacteria;p__Chloroflexi;c__Dehalococcoidia;o__vadinBA26;f__uncultured_bacterium;g__	0.000119774
k__Bacteria;p__Cyanobacteria;c__Oxyphotobacteria;o__Chloroplast;f__Pavlova_lutheri;g__<empty>	0.000119774
k__Bacteria;p__Dependentiae;c__Babeliae;o__Babeliales;f__Vermiphilaceae;g__uncultured_delta_proteobacterium	0.000119774
k__Bacteria;p__Firmicutes;c__Clostridia;o__Clostridiales;f__Family_XI;g__Gottschalkia	0.000119774
k__Bacteria;p__Firmicutes;c__Clostridia;o__Clostridiales;f__Syntrophomonadaceae;g__	0.000119774
k__Bacteria;p__Patescibacteria;c__Parcubacteria;o__Candidatus_Portnoybacteria;f__uncultured_bacterium;g__	0.000119774
k__Bacteria;p__Planctomycetes;c__Pla3_lineage;o__uncultured_bacterium;f__<empty>;g__	0.000119774
k__Bacteria;p__Planctomycetes;c__vadinHA49;o__uncultured_organism;f__<empty>;g__	0.000119774
k__Bacteria;p__Proteobacteria;c__Alphaproteobacteria;o__Rhizobiales;f__Rhizobiaceae;g__Mesorhizobium	0.000119774
k__Bacteria;p__Proteobacteria;c__Deltaproteobacteria;o__Desulfarculales;f__Desulfarculaceae;g__uncultured	0.000119774
k__Archaea;p__Diapherotrites;c__Micrarchaeia;o__uncultured_archaeon;f__<empty>;g__	0.000109792
k__Bacteria;p__Acidobacteria;c__Thermoanaerobaculia;o__Thermoanaerobaculales;f__Thermoanaerobaculaceae;g__	0.000109792
k__Bacteria;p__Actinobacteria;c__Acidimicrobiia;o__Actinomarinales;f__uncultured;g__uncultured_bacterium	0.000109792
k__Bacteria;p__Actinobacteria;c__Actinobacteria;o__Frankiales;f__Geodermatophilaceae;g__Blastococcus	0.000109792
k__Bacteria;p__Bacteroidetes;c__Bacteroidia;o__Bacteroidales;f__Bacteroidetes_BD2-2;g__uncultured_Bacteroidetes_bacterium	0.000109792
k__Bacteria;p__Bacteroidetes;c__Ignavibacteria;o__OPB56;f__uncultured_bacterium;g__<empty>	0.000109792
k__Bacteria;p__Chloroflexi;c__Anaerolineae;o__Anaerolineales;f__Anaerolineaceae;g__GWD2-49-16	0.000109792
k__Bacteria;p__Chloroflexi;c__Dehalococcoidia;o__SAR202_clade;f__;g__	0.000109792
k__Bacteria;p__Kiritimatiellaeota;c__Kiritimatiellae;o__WCHB1-41;f__uncultured_Verrucomicrobia_bacterium;g__	0.000109792
k__Bacteria;p__Latescibacteria;c__Latescibacteria;o__Latescibacterales;f__Latescibacteraceae;g__Latescibacteria_bacterium_SCGC_AAA257-K07	0.000109792
k__Bacteria;p__Latescibacteria;c__uncultured_Verrucomicrobia_bacterium;o__<empty>;f__<empty>;g__<empty>	0.000109792
k__Bacteria;p__Marinimicrobia_(SAR406_clade);c__uncultured_organism;o__<empty>;f__<empty>;g__<empty>	0.000109792
k__Bacteria;p__Patescibacteria;c__Gracilibacteria;o__Candidatus_Peregrinibacteria;f__uncultured_bacterium;g__<empty>	0.000109792
k__Bacteria;p__Patescibacteria;c__Gracilibacteria;o__Candidatus_Peregrinibacteria;f__uncultured_organism;g__<empty>	0.000109792
k__Bacteria;p__Planctomycetes;c__ODP123;o__uncultured_organism;f__<empty>;g__	0.000109792
k__Bacteria;p__Planctomycetes;c__Phycisphaerae;o__Phycisphaerales;f__Phycisphaeraceae;g__	0.000109792
k__Bacteria;p__Proteobacteria;c__Alphaproteobacteria;o__Rhizobiales;f__Beijerinckiaceae;g__Microvirga	0.000109792
k__Bacteria;p__Proteobacteria;c__Deltaproteobacteria;o__Desulfobacterales;f__Desulfobulbaceae;g__uncultured	0.000109792
k__Bacteria;p__Proteobacteria;c__Deltaproteobacteria;o__Myxococcales;f__Sandaracinaceae;g__uncultured	0.000109792
k__Bacteria;p__Proteobacteria;c__Gammaproteobacteria;o__Gammaproteobacteria_Incertae_Sedis;f__Unknown_Family;g__	0.000109792
k__Bacteria;p__Zixibacteria;c__uncultured_delta_proteobacterium;o__<empty>;f__<empty>;g__<empty>	0.000109792
k__Archaea;p__Euryarchaeota;c__Thermoplasmata;o__SG8-5;f__uncultured_euryarchaeote;g__<empty>	9.98114e-05
k__Archaea;p__Hadesarchaeaeota;c__uncultured_archaeon;o__<empty>;f__<empty>;g__<empty>	9.98114e-05
k__Bacteria;p__Acetothermia;c__Acetothermiia;o__bacterium_enrichment_culture_clone_AOM-SR-B22;f__<empty>;g__<empty>	9.98114e-05
k__Bacteria;p__Actinobacteria;c__Thermoleophilia;o__Solirubrobacterales;f__67-14;g__uncultured_bacterium	9.98114e-05
k__Bacteria;p__Calditrichaeota;c__Calditrichia;o__Calditrichales;f__Calditrichaceae;g__uncultured_organism	9.98114e-05
k__Bacteria;p__Chloroflexi;c__Dehalococcoidia;o__GIF3;f__uncultured_organism;g__<empty>	9.98114e-05
k__Bacteria;p__Chloroflexi;c__Dehalococcoidia;o__Napoli-4B-65;f__uncultured_bacterium;g__	9.98114e-05
k__Bacteria;p__Cyanobacteria;c__Oxyphotobacteria;o__Chloroplast;f__Ochromonas_sp._CCMP1393;g__<empty>	9.98114e-05
k__Bacteria;p__Fibrobacteres;c__Fibrobacteria;o__Fibrobacterales;f__;g__	9.98114e-05
k__Bacteria;p__Firmicutes;c__Clostridia;o__Clostridiales;f__Defluviitaleaceae;g__Defluviitaleaceae_UCG-011	9.98114e-05
k__Bacteria;p__Margulisbacteria;c__uncultured_organism;o__<empty>;f__<empty>;g__	9.98114e-05
k__Bacteria;p__Marinimicrobia_(SAR406_clade);c__uncultured_bacterium;o__<empty>;f__<empty>;g__	9.98114e-05
k__Bacteria;p__Planctomycetes;c__Pla3_lineage;o__uncultured_planctomycete;f__<empty>;g__	9.98114e-05
k__Bacteria;p__Proteobacteria;c__Alphaproteobacteria;o__Rickettsiales;f__Mitochondria;g__	9.98114e-05
k__Bacteria;p__Proteobacteria;c__Deltaproteobacteria;o__MBNT15;f__uncultured_bacterium;g__<empty>	9.98114e-05
k__Bacteria;p__Proteobacteria;c__Deltaproteobacteria;o__PB19;f__uncultured_bacterium;g__<empty>	9.98114e-05
k__Bacteria;p__Proteobacteria;c__Deltaproteobacteria;o__Sva0485;f__uncultured_Desulfobulbaceae_bacterium;g__<empty>	9.98114e-05
k__Bacteria;p__Proteobacteria;c__Deltaproteobacteria;o__Syntrophobacterales;f__Syntrophaceae;g__Desulfomonile	9.98114e-05
k__Bacteria;p__Schekmanbacteria;c__uncultured_bacterium;o__<empty>;f__<empty>;g__	9.98114e-05
k__Bacteria;p__Schekmanbacteria;c__uncultured_bacterium;o__<empty>;f__<empty>;g__<empty>	9.98114e-05
k__Bacteria;p__Verrucomicrobia;c__Verrucomicrobiae;o__Verrucomicrobiales;f__DEV007;g__uncultured_Verrucomicrobia_bacterium	9.98114e-05
k__Bacteria;p__Verrucomicrobia;c__Verrucomicrobiae;o__Verrucomicrobiales;f__Rubritaleaceae;g__Persicirhabdus	9.98114e-05
k__Bacteria;p__WS2;c__uncultured_organism;o__<empty>;f__<empty>;g__	9.98114e-05
k__Bacteria;p__uncultured;c__uncultured_bacterium;o__<empty>;f__<empty>;g__	9.98114e-05
k__Archaea;p__Diapherotrites;c__Micrarchaeia;o__uncultured_archaeon;f__<empty>;g__<empty>	8.98302e-05
k__Archaea;p__Nanoarchaeaeota;c__Woesearchaeia;o__uncultured_euryarchaeote;f__<empty>;g__<empty>	8.98302e-05
k__Bacteria;p__Acidobacteria;c__Acidobacteriia;o__Solibacterales;f__Solibacteraceae_(Subgroup_3);g__PAUC26f	8.98302e-05
k__Bacteria;p__Acidobacteria;c__Subgroup_17;o__uncultured_Acidobacteria_bacterium;f__<empty>;g__	8.98302e-05
k__Bacteria;p__Bacteroidetes;c__Bacteroidia;o__Sphingobacteriales;f__;g__	8.98302e-05
k__Bacteria;p__Chlamydiae;c__Chlamydiae;o__Chlamydiales;f__Parachlamydiaceae;g__	8.98302e-05
k__Bacteria;p__Elusimicrobia;c__Elusimicrobia;o__Lineage_IV;f__Elusimicrobia_bacterium_GWA2_69_24;g__	8.98302e-05
k__Bacteria;p__Elusimicrobia;c__Lineage_IIc;o__Elusimicrobia_bacterium_CG1_02_37_114;f__<empty>;g__	8.98302e-05
k__Bacteria;p__Fibrobacteres;c__Fibrobacteria;o__Fibrobacterales;f__Fibrobacteraceae;g__	8.98302e-05
k__Bacteria;p__Firmicutes;c__Clostridia;o__Clostridiales;f__Christensenellaceae;g__uncultured	8.98302e-05
k__Bacteria;p__Latescibacteria;c__uncultured_organism;o__<empty>;f__<empty>;g__	8.98302e-05
k__Bacteria;p__Marinimicrobia_(SAR406_clade);c__uncultured_organism;o__<empty>;f__<empty>;g__	8.98302e-05
k__Bacteria;p__Omnitrophicaeota;c__uncultured_organism;o__<empty>;f__<empty>;g__	8.98302e-05
k__Bacteria;p__PAUC34f;c__uncultured_bacterium;o__<empty>;f__<empty>;g__<empty>	8.98302e-05
k__Bacteria;p__Patescibacteria;c__ABY1;o__Candidatus_Kerfeldbacteria;f__uncultured_organism;g__	8.98302e-05
k__Bacteria;p__Planctomycetes;c__Brocadiae;o__SM23-32;f__Planctomycetes_bacterium_SM23_32;g__	8.98302e-05
k__Bacteria;p__Planctomycetes;c__Phycisphaerae;o__mle1-8;f__uncultured_bacterium;g__<empty>	8.98302e-05
k__Bacteria;p__Planctomycetes;c__Phycisphaerae;o__mle1-8;f__uncultured_organism;g__<empty>	8.98302e-05
k__Bacteria;p__Proteobacteria;c__Deltaproteobacteria;o__Bradymonadales;f__uncultured_Geobacteraceae_bacterium;g__<empty>	8.98302e-05
k__Bacteria;p__Proteobacteria;c__Deltaproteobacteria;o__Desulfobacterales;f__Desulfobacteraceae;g__Desulfobacter	8.98302e-05
k__Bacteria;p__Proteobacteria;c__Deltaproteobacteria;o__Desulfobacterales;f__Desulfobacteraceae;g__uncultured_bacterium	8.98302e-05
k__Bacteria;p__Proteobacteria;c__Deltaproteobacteria;o__Myxococcales;f__MSB-4B10;g__uncultured_delta_proteobacterium	8.98302e-05
k__Bacteria;p__Proteobacteria;c__Deltaproteobacteria;o__Myxococcales;f__Polyangiaceae;g__Chondromyces	8.98302e-05
k__Bacteria;p__Proteobacteria;c__Deltaproteobacteria;o__Oligoflexales;f__Oligoflexaceae;g__uncultured	8.98302e-05
k__Bacteria;p__Proteobacteria;c__Gammaproteobacteria;o__uncultured;f__uncultured_bacterium;g__<empty>	8.98302e-05
k__Bacteria;p__Verrucomicrobia;c__Verrucomicrobiae;o__Verrucomicrobiales;f__DEV007;g__	8.98302e-05
k__Archaea;p__Euryarchaeota;c__Methanomicrobia;o__Methanosarcinales;f__Methermicoccaceae;g__uncultured_archaeon	7.98491e-05
k__Archaea;p__Nanoarchaeaeota;c__Nanohaloarchaeia;o__Aenigmarchaeales;f__uncultured_euryarchaeote;g__<empty>	7.98491e-05
k__Bacteria;p__BRC1;c__;o__;f__;g__	7.98491e-05
k__Bacteria;p__Bacteroidetes;c__Bacteroidia;o__Bacteroidales;f__Prolixibacteraceae;g__	7.98491e-05
k__Bacteria;p__Bacteroidetes;c__Ignavibacteria;o__OPB56;f__;g__	7.98491e-05
k__Bacteria;p__Chloroflexi;c__Dehalococcoidia;o__H3.93;f__uncultured_bacterium;g__	7.98491e-05
k__Bacteria;p__Latescibacteria;c__uncultured_organism;o__<empty>;f__<empty>;g__<empty>	7.98491e-05
k__Bacteria;p__Omnitrophicaeota;c__Omnitrophia;o__Omnitrophales;f__Omnitrophaceae;g__	7.98491e-05
k__Bacteria;p__Patescibacteria;c__Gracilibacteria;o__Absconditabacteriales_(SR1);f__uncultured_organism;g__	7.98491e-05
k__Bacteria;p__Patescibacteria;c__Kazania;o__candidate_division_Kazan_bacterium_RBG_13_50_9;f__<empty>;g__	7.98491e-05
k__Bacteria;p__Patescibacteria;c__Kazania;o__uncultured_bacterium;f__<empty>;g__<empty>	7.98491e-05
k__Bacteria;p__Patescibacteria;c__Parcubacteria;o__GWA2-38-13b;f__uncultured_Parcubacteria_group_bacterium;g__<empty>	7.98491e-05
k__Bacteria;p__Planctomycetes;c__ODP123;o__uncultured_planctomycete;f__<empty>;g__	7.98491e-05
k__Bacteria;p__Planctomycetes;c__OM190;o__uncultured_bacterium;f__<empty>;g__	7.98491e-05
k__Bacteria;p__Planctomycetes;c__Phycisphaerae;o__MSBL9;f__SG8-4;g__uncultured_microorganism	7.98491e-05
k__Bacteria;p__Planctomycetes;c__Phycisphaerae;o__MSBL9;f__SG8-4;g__uncultured_planctomycete	7.98491e-05
k__Bacteria;p__Proteobacteria;c__Alphaproteobacteria;o__Rhizobiales;f__Xanthobacteraceae;g__uncultured	7.98491e-05
k__Bacteria;p__Proteobacteria;c__Alphaproteobacteria;o__Rhodobacterales;f__Rhodobacteraceae;g__Sulfitobacter	7.98491e-05
k__Bacteria;p__Proteobacteria;c__Deltaproteobacteria;o__Myxococcales;f__VHS-B3-70;g__	7.98491e-05
k__Bacteria;p__Proteobacteria;c__Deltaproteobacteria;o__SAR324_clade(Marine_group_B);f__uncultured_bacterium;g__<empty>	7.98491e-05
k__Bacteria;p__Proteobacteria;c__Gammaproteobacteria;o__Oceanospirillales;f__Halomonadaceae;g__Halomonas	7.98491e-05
k__Bacteria;p__WOR-1;c__uncultured_prokaryote;o__<empty>;f__<empty>;g__	7.98491e-05
k__Archaea;p__Diapherotrites;c__Iainarchaeia;o__Iainarchaeales;f__uncultured_archaeon;g__<empty>	6.98679e-05
k__Archaea;p__Euryarchaeota;c__Thermoplasmata;o__uncultured;f__uncultured_archaeon;g__	6.98679e-05
k__Bacteria;p__Acidobacteria;c__Subgroup_9;o__;f__;g__	6.98679e-05
k__Bacteria;p__Acidobacteria;c__Thermoanaerobaculia;o__Thermoanaerobaculales;f__Thermoanaerobaculaceae;g__Subgroup_23	6.98679e-05
k__Bacteria;p__BRC1;c__uncultured_candidate_division_BRC1_bacterium;o__<empty>;f__<empty>;g__<empty>	6.98679e-05
k__Bacteria;p__Bacteroidetes;c__Bacteroidia;o__Bacteroidales;f__Marinilabiliaceae;g__Labilibacter	6.98679e-05
k__Bacteria;p__Chloroflexi;c__Anaerolineae;o__Anaerolineales;f__Anaerolineaceae;g__Leptolinea	6.98679e-05
k__Bacteria;p__Chloroflexi;c__Anaerolineae;o__Anaerolineales;f__Anaerolineaceae;g__Ornatilinea	6.98679e-05
k__Bacteria;p__Chloroflexi;c__Anaerolineae;o__RBG-13-54-9;f__uncultured_bacterium;g__	6.98679e-05
k__Bacteria;p__Chloroflexi;c__Dehalococcoidia;o__1226B1H1-22-FL;f__uncultured_bacterium;g__<empty>	6.98679e-05
k__Bacteria;p__Epsilonbacteraeota;c__Campylobacteria;o__Campylobacterales;f__Sulfurovaceae;g__Sulfurovum	6.98679e-05
k__Bacteria;p__Fibrobacteres;c__Fibrobacteria;o__Fibrobacterales;f__B5-096;g__	6.98679e-05
k__Bacteria;p__Firmicutes;c__Bacilli;o__Bacillales;f__Paenibacillaceae;g__Paenibacillus	6.98679e-05
k__Bacteria;p__Firmicutes;c__Clostridia;o__Clostridiales;f__Clostridiales_vadinBB60_group;g__	6.98679e-05
k__Bacteria;p__Firmicutes;c__Clostridia;o__Clostridiales;f__Peptococcaceae;g__Desulfosporosinus	6.98679e-05
k__Bacteria;p__Firmicutes;c__Clostridia;o__Clostridiales;f__Syntrophomonadaceae;g__uncultured	6.98679e-05
k__Bacteria;p__Lentisphaerae;c__Lentisphaeria;o__Victivallales;f__PRD18C08;g__uncultured_Lentisphaerae_bacterium	6.98679e-05
k__Bacteria;p__Lentisphaerae;c__Lentisphaeria;o__Victivallales;f__PRD18C08;g__uncultured_bacterium	6.98679e-05
k__Bacteria;p__Patescibacteria;c__Gracilibacteria;o__uncultured_Microgenomates_group_bacterium;f__<empty>;g__<empty>	6.98679e-05
k__Bacteria;p__Patescibacteria;c__Gracilibacteria;o__uncultured_organism;f__<empty>;g__	6.98679e-05
k__Bacteria;p__Patescibacteria;c__Parcubacteria;o__Paceibacterales;f__Paceibacteraceae;g__	6.98679e-05
k__Bacteria;p__Planctomycetes;c__OM190;o__uncultured_planctomycete;f__<empty>;g__<empty>	6.98679e-05
k__Bacteria;p__Planctomycetes;c__Pla4_lineage;o__uncultured_planctomycete;f__<empty>;g__	6.98679e-05
k__Bacteria;p__Planctomycetes;c__Planctomycetacia;o__Pirellulales;f__Pirellulaceae;g__Blastopirellula	6.98679e-05
k__Bacteria;p__Planctomycetes;c__Planctomycetacia;o__uncultured;f__uncultured_bacterium;g__	6.98679e-05
k__Bacteria;p__Planctomycetes;c__Planctomycetacia;o__uncultured;f__uncultured_bacterium;g__<empty>	6.98679e-05
k__Bacteria;p__Proteobacteria;c__Alphaproteobacteria;o__Rhizobiales;f__Methyloligellaceae;g__uncultured	6.98679e-05
k__Bacteria;p__Proteobacteria;c__Deltaproteobacteria;o__Desulfobacterales;f__Desulfobulbaceae;g__MSBL7	6.98679e-05
k__Bacteria;p__Proteobacteria;c__Deltaproteobacteria;o__Desulfuromonadales;f__Desulfuromonadaceae;g__Desulfuromusa	6.98679e-05
k__Bacteria;p__Proteobacteria;c__Deltaproteobacteria;o__Myxococcales;f__Eel-36e1D6;g__uncultured_bacterium	6.98679e-05
k__Bacteria;p__Proteobacteria;c__Deltaproteobacteria;o__Oligoflexales;f__0319-6G20;g__uncultured_bacterium	6.98679e-05
k__Bacteria;p__Proteobacteria;c__Gammaproteobacteria;o__Cellvibrionales;f__Halieaceae;g__Halioglobus	6.98679e-05
k__Bacteria;p__Rokubacteria;c__NC10;o__Methylomirabilales;f__Methylomirabilaceae;g__	6.98679e-05
k__Bacteria;p__Verrucomicrobia;c__Verrucomicrobiae;o__Chthoniobacterales;f__Xiphinematobacteraceae;g__Candidatus_Xiphinematobacter	6.98679e-05
k__Archaea;p__Asgardaeota;c__Odinarchaeia;o__uncultured_archaeon;f__<empty>;g__	5.98868e-05
k__Archaea;p__Diapherotrites;c__Iainarchaeia;o__;f__;g__	5.98868e-05
k__Archaea;p__Diapherotrites;c__Micrarchaeia;o__Candidatus_Micrarchaeota_archaeon_CG1_02_55_41;f__<empty>;g__<empty>	5.98868e-05
k__Archaea;p__Euryarchaeota;c__Thermoplasmata;o__SG8-5;f__;g__	5.98868e-05
k__Bacteria;p__Actinobacteria;c__Actinobacteria;o__Streptomycetales;f__Streptomycetaceae;g__Streptomyces	5.98868e-05
k__Bacteria;p__Bacteroidetes;c__Bacteroidia;o__Chitinophagales;f__Saprospiraceae;g__Phaeodactylibacter	5.98868e-05
k__Bacteria;p__Bacteroidetes;c__Bacteroidia;o__Sphingobacteriales;f__Lentimicrobiaceae;g__bacterium_enrichment_culture_clone_AOM-SR-B3	5.98868e-05
k__Bacteria;p__Calditrichaeota;c__Calditrichia;o__Calditrichales;f__Calditrichaceae;g__Caldithrix	5.98868e-05
k__Bacteria;p__Chlamydiae;c__Chlamydiae;o__Chlamydiales;f__Chlamydiaceae;g__	5.98868e-05
k__Bacteria;p__Chlamydiae;c__Chlamydiae;o__Chlamydiales;f__cvE6;g__	5.98868e-05
k__Bacteria;p__Chloroflexi;c__Anaerolineae;o__Anaerolineales;f__Anaerolineaceae;g__Anaerolinea	5.98868e-05
k__Bacteria;p__Chloroflexi;c__Anaerolineae;o__Anaerolineales;f__Anaerolineaceae;g__Thermomarinilinea	5.98868e-05
k__Bacteria;p__Chloroflexi;c__Anaerolineae;o__Caldilineales;f__Caldilineaceae;g__uncultured	5.98868e-05
k__Bacteria;p__Chloroflexi;c__Dehalococcoidia;o__3051bac4-16;f__uncultured_bacterium;g__	5.98868e-05
k__Bacteria;p__Chloroflexi;c__Dehalococcoidia;o__Dehalococcoidales;f__uncultured;g__uncultured_bacterium	5.98868e-05
k__Bacteria;p__Chloroflexi;c__Dehalococcoidia;o__ER-E4-17;f__uncultured_bacterium;g__<empty>	5.98868e-05
k__Bacteria;p__Chloroflexi;c__Dehalococcoidia;o__FW22;f__uncultured_bacterium;g__	5.98868e-05
k__Bacteria;p__Chloroflexi;c__JG30-KF-CM66;o__uncultured_bacterium;f__<empty>;g__	5.98868e-05
k__Bacteria;p__Elusimicrobia;c__Lineage_IIa;o__;f__;g__	5.98868e-05
k__Bacteria;p__Firmicutes;c__Bacilli;o__Bacillales;f__Planococcaceae;g__Lysinibacillus	5.98868e-05
k__Bacteria;p__Kiritimatiellaeota;c__Kiritimatiellae;o__Kiritimatiellales;f__Kiritimatiellaceae;g__MSBL3	5.98868e-05
k__Bacteria;p__Kiritimatiellaeota;c__Kiritimatiellae;o__WCHB1-41;f__uncultured_organism;g__	5.98868e-05
k__Bacteria;p__Omnitrophicaeota;c__uncultured_Omnitrophica_bacterium;o__<empty>;f__<empty>;g__	5.98868e-05
k__Bacteria;p__Patescibacteria;c__Parcubacteria;o__CG1-02-42-13;f__uncultured_organism;g__	5.98868e-05
k__Bacteria;p__Planctomycetes;c__Brocadiae;o__SM23-32;f__uncultured_bacterium;g__	5.98868e-05
k__Bacteria;p__Planctomycetes;c__Phycisphaerae;o__Phycisphaerales;f__Phycisphaeraceae;g__Urania-1B-19_marine_sediment_group	5.98868e-05
k__Bacteria;p__Proteobacteria;c__Alphaproteobacteria;o__Rhizobiales;f__Xanthobacteraceae;g__Bradyrhizobium	5.98868e-05
k__Bacteria;p__Proteobacteria;c__Alphaproteobacteria;o__Rickettsiales;f__Mitochondria;g__metagenome	5.98868e-05
k__Bacteria;p__Proteobacteria;c__Deltaproteobacteria;o__10bav-F6;f__;g__	5.98868e-05
k__Bacteria;p__Proteobacteria;c__Deltaproteobacteria;o__FW113;f__uncultured_bacterium;g__<empty>	5.98868e-05
k__Bacteria;p__Proteobacteria;c__Deltaproteobacteria;o__SAR324_clade(Marine_group_B);f__uncultured_delta_proteobacterium;g__<empty>	5.98868e-05
k__Bacteria;p__Proteobacteria;c__Gammaproteobacteria;o__Diplorickettsiales;f__Diplorickettsiaceae;g__uncultured	5.98868e-05
k__Bacteria;p__Thermotogae;c__Thermotogae;o__Petrotogales;f__Petrotogaceae;g__SC103	5.98868e-05
k__Archaea;p__Asgardaeota;c__;o__;f__;g__	4.99057e-05
k__Archaea;p__Diapherotrites;c__Iainarchaeia;o__Iainarchaeales;f__Diapherotrites_archaeon_SCGC_AAA011-K09;g__	4.99057e-05
k__Archaea;p__Diapherotrites;c__Iainarchaeia;o__uncultured_archaeon;f__<empty>;g__<empty>	4.99057e-05
k__Archaea;p__Euryarchaeota;c__Methanobacteria;o__Methanobacteriales;f__Methanobacteriaceae;g__Methanobacterium	4.99057e-05
k__Archaea;p__Thaumarchaeota;c__Nitrososphaeria;o__Nitrososphaerales;f__Nitrososphaeraceae;g__uncultured_crenarchaeote	4.99057e-05
k__Bacteria;p__Actinobacteria;c__Thermoleophilia;o__Gaiellales;f__uncultured;g__uncultured_actinobacterium	4.99057e-05
k__Bacteria;p__Aegiribacteria;c__;o__;f__;g__	4.99057e-05
k__Bacteria;p__BRC1;c__uncultured_bacterium;o__<empty>;f__<empty>;g__	4.99057e-05
k__Bacteria;p__Bacteroidetes;c__Bacteroidia;o__Bacteroidales;f__Marinilabiliaceae;g__uncultured	4.99057e-05
k__Bacteria;p__Bacteroidetes;c__Bacteroidia;o__Bacteroidales;f__SB-5;g__uncultured_organism	4.99057e-05
k__Bacteria;p__Bacteroidetes;c__Ignavibacteria;o__Ignavibacteriales;f__PHOS-HE36;g__	4.99057e-05
k__Bacteria;p__Bacteroidetes;c__Rhodothermia;o__Rhodothermales;f__Rhodothermaceae;g__uncultured	4.99057e-05
k__Bacteria;p__Calditrichaeota;c__Calditrichia;o__Calditrichales;f__Calditrichaceae;g__uncultured_Deferribacteres_bacterium	4.99057e-05
k__Bacteria;p__Chloroflexi;c__Anaerolineae;o__Ardenticatenales;f__uncultured;g__	4.99057e-05
k__Bacteria;p__Chloroflexi;c__Dehalococcoidia;o__661239;f__uncultured_bacterium;g__<empty>	4.99057e-05
k__Bacteria;p__Chloroflexi;c__Dehalococcoidia;o__DscP2;f__uncultured_eubacterium_H1.4.f;g__<empty>	4.99057e-05
k__Bacteria;p__Chloroflexi;c__Dehalococcoidia;o__FS117-23B-02;f__;g__	4.99057e-05
k__Bacteria;p__Chloroflexi;c__Dehalococcoidia;o__GIF9;f__AB-539-J10;g__Dsc1	4.99057e-05
k__Bacteria;p__Chloroflexi;c__Dehalococcoidia;o__MSBL5;f__uncultured_organism;g__<empty>	4.99057e-05
k__Bacteria;p__Chloroflexi;c__Dehalococcoidia;o__S085;f__uncultured_bacterium;g__	4.99057e-05
k__Bacteria;p__Chloroflexi;c__Dehalococcoidia;o__SPG12-343-353-B75;f__uncultured_bacterium;g__	4.99057e-05
k__Bacteria;p__Chloroflexi;c__Dehalococcoidia;o__uncultured_bacterium;f__<empty>;g__	4.99057e-05
k__Bacteria;p__Elusimicrobia;c__Lineage_IIa;o__Elusimicrobia_bacterium_RIFCSPLOWO2_01_FULL_59_12;f__<empty>;g__	4.99057e-05
k__Bacteria;p__Elusimicrobia;c__Lineage_IIb;o__uncultured_organism;f__<empty>;g__<empty>	4.99057e-05
k__Bacteria;p__Firmicutes;c__Clostridia;o__Clostridiales;f__GoM-GC232-4463-Bac1;g__	4.99057e-05
k__Bacteria;p__Patescibacteria;c__ABY1;o__Candidatus_Falkowbacteria;f__Candidatus_Falkowbacteria_bacterium_GW2011_GWA2_41_14;g__<empty>	4.99057e-05
k__Bacteria;p__Patescibacteria;c__Microgenomatia;o__uncultured_Microgenomates_group_bacterium;f__<empty>;g__	4.99057e-05
k__Bacteria;p__Planctomycetes;c__Phycisphaerae;o__CCM11a;f__uncultured_Planctomycetales_bacterium;g__	4.99057e-05
k__Bacteria;p__Planctomycetes;c__Phycisphaerae;o__S-70;f__uncultured_bacterium;g__<empty>	4.99057e-05
k__Bacteria;p__Proteobacteria;c__Alphaproteobacteria;o__Caulobacterales;f__Hyphomonadaceae;g__uncultured	4.99057e-05
k__Bacteria;p__Proteobacteria;c__Alphaproteobacteria;o__Rhizobiales;f__Hyphomicrobiaceae;g__uncultured	4.99057e-05
k__Bacteria;p__Proteobacteria;c__Alphaproteobacteria;o__Rhizobiales;f__Rhizobiales_Incertae_Sedis;g__Bauldia	4.99057e-05
k__Bacteria;p__Proteobacteria;c__Alphaproteobacteria;o__Rhizobiales;f__Xanthobacteraceae;g__	4.99057e-05
k__Bacteria;p__Proteobacteria;c__Alphaproteobacteria;o__Rhizobiales;f__Xanthobacteraceae;g__Afipia	4.99057e-05
k__Bacteria;p__Proteobacteria;c__Alphaproteobacteria;o__Rhodobacterales;f__Rhodobacteraceae;g__uncultured	4.99057e-05
k__Bacteria;p__Proteobacteria;c__Alphaproteobacteria;o__Sphingomonadales;f__Sphingomonadaceae;g__Sphingomonas	4.99057e-05
k__Bacteria;p__Proteobacteria;c__Deltaproteobacteria;o__Desulfuromonadales;f__Desulfuromonadaceae;g__	4.99057e-05
k__Bacteria;p__Proteobacteria;c__Deltaproteobacteria;o__Myxococcales;f__Eel-36e1D6;g__uncultured_Polyangiaceae_bacterium	4.99057e-05
k__Bacteria;p__Proteobacteria;c__Deltaproteobacteria;o__Myxococcales;f__PS-B29;g__uncultured_bacterium	4.99057e-05
k__Bacteria;p__Proteobacteria;c__Deltaproteobacteria;o__Myxococcales;f__PS-B29;g__uncultured_organism	4.99057e-05
k__Bacteria;p__Proteobacteria;c__Deltaproteobacteria;o__Myxococcales;f__UASB-TL25;g__uncultured_bacterium	4.99057e-05
k__Bacteria;p__Proteobacteria;c__Deltaproteobacteria;o__Myxococcales;f__bacteriap25;g__uncultured_bacterium	4.99057e-05
k__Bacteria;p__Proteobacteria;c__Deltaproteobacteria;o__NB1-j;f__;g__	4.99057e-05
k__Bacteria;p__Proteobacteria;c__Deltaproteobacteria;o__NB1-j;f__uncultured_bacterium;g__<empty>	4.99057e-05
k__Bacteria;p__Proteobacteria;c__Gammaproteobacteria;o__Thiomicrospirales;f__Thioglobaceae;g__	4.99057e-05
k__Bacteria;p__WPS-2;c__bacterium_ADurb.Bin236;o__<empty>;f__<empty>;g__	4.99057e-05
k__Bacteria;p__Zixibacteria;c__uncultured_prokaryote;o__<empty>;f__<empty>;g__<empty>	4.99057e-05
k__Archaea;p__Euryarchaeota;c__Thermoplasmata;o__Methanomassiliicoccales;f__uncultured;g__	3.99245e-05
k__Archaea;p__Nanoarchaeaeota;c__Woesearchaeia;o__uncultured_bacterium;f__<empty>;g__	3.99245e-05
k__Bacteria;p__Acetothermia;c__Acetothermiia;o__uncultured_organism;f__<empty>;g__	3.99245e-05
k__Bacteria;p__Actinobacteria;c__Actinobacteria;o__Streptosporangiales;f__Nocardiopsaceae;g__Nocardiopsis	3.99245e-05
k__Bacteria;p__Actinobacteria;c__Thermoleophilia;o__Gaiellales;f__Gaiellaceae;g__Gaiella	3.99245e-05
k__Bacteria;p__Actinobacteria;c__Thermoleophilia;o__Solirubrobacterales;f__67-14;g__uncultured_actinobacterium	3.99245e-05
k__Bacteria;p__Bacteroidetes;c__Bacteroidia;o__Flavobacteriales;f__Flavobacteriaceae;g__Eudoraea	3.99245e-05
k__Bacteria;p__Bacteroidetes;c__Ignavibacteria;o__OPB56;f__uncultured_Chlorobi_bacterium;g__<empty>	3.99245e-05
k__Bacteria;p__CK-2C2-2;c__uncultured_organism;o__<empty>;f__<empty>;g__	3.99245e-05
k__Bacteria;p__Calditrichaeota;c__Calditrichia;o__Calditrichales;f__Calditrichaceae;g__JdFR-76	3.99245e-05
k__Bacteria;p__Chloroflexi;c__Dehalococcoidia;o__GIF9;f__;g__	3.99245e-05
k__Bacteria;p__Chloroflexi;c__Dehalococcoidia;o__Napoli-4B-65;f__;g__	3.99245e-05
k__Bacteria;p__Cyanobacteria;c__Oxyphotobacteria;o__Chloroplast;f__uncultured_phototrophic_eukaryote;g__<empty>	3.99245e-05
k__Bacteria;p__Elusimicrobia;c__Elusimicrobia;o__Lineage_IV;f__;g__	3.99245e-05
k__Bacteria;p__Elusimicrobia;c__Lineage_IIc;o__Elusimicrobia_bacterium_CG1_02_37_114;f__<empty>;g__<empty>	3.99245e-05
k__Bacteria;p__Elusimicrobia;c__Lineage_IIc;o__uncultured_bacterium;f__<empty>;g__<empty>	3.99245e-05
k__Bacteria;p__Elusimicrobia;c__Rs-M47;o__uncultured_bacterium;f__<empty>;g__	3.99245e-05
k__Bacteria;p__Elusimicrobia;c__Rs-M47;o__uncultured_organism;f__<empty>;g__	3.99245e-05
k__Bacteria;p__Fibrobacteres;c__Fibrobacteria;o__Fibrobacterales;f__uncultured_bacterium;g__<empty>	3.99245e-05
k__Bacteria;p__Firmicutes;c__Bacilli;o__Bacillales;f__Bacillaceae;g__Oceanobacillus	3.99245e-05
k__Bacteria;p__Firmicutes;c__Bacilli;o__Lactobacillales;f__Leuconostocaceae;g__Leuconostoc	3.99245e-05
k__Bacteria;p__Firmicutes;c__Clostridia;o__Clostridiales;f__Peptostreptococcaceae;g__Clostridioides	3.99245e-05
k__Bacteria;p__Firmicutes;c__Clostridia;o__Clostridiales;f__Ruminococcaceae;g__	3.99245e-05
k__Bacteria;p__Gemmatimonadetes;c__BD2-11_terrestrial_group;o__uncultured_Gemmatimonadetes_bacterium;f__<empty>;g__<empty>	3.99245e-05
k__Bacteria;p__Kiritimatiellaeota;c__Kiritimatiellae;o__WCHB1-41;f__metagenome;g__<empty>	3.99245e-05
k__Bacteria;p__Kiritimatiellaeota;c__Kiritimatiellae;o__WCHB1-41;f__uncultured_prokaryote;g__	3.99245e-05
k__Bacteria;p__Lentisphaerae;c__Oligosphaeria;o__Oligosphaerales;f__Lenti-02;g__	3.99245e-05
k__Bacteria;p__Lentisphaerae;c__Oligosphaeria;o__SS1-B-02-17;f__uncultured_bacterium;g__<empty>	3.99245e-05
k__Bacteria;p__Lentisphaerae;c__Oligosphaeria;o__SS1-B-02-17;f__uncultured_organism;g__	3.99245e-05
k__Bacteria;p__Patescibacteria;c__ABY1;o__Candidatus_Falkowbacteria;f__Parcubacteria_group_bacterium_ADurb.Bin316;g__	3.99245e-05
k__Bacteria;p__Patescibacteria;c__Microgenomatia;o__Candidatus_Woesebacteria;f__uncultured_Microgenomates_group_bacterium;g__	3.99245e-05
k__Bacteria;p__Patescibacteria;c__Parcubacteria;o__Candidatus_Moranbacteria;f__uncultured_bacterium;g__	3.99245e-05
k__Bacteria;p__Planctomycetes;c__Phycisphaerae;o__C86;f__;g__	3.99245e-05
k__Bacteria;p__Planctomycetes;c__Phycisphaerae;o__MSBL9;f__;g__	3.99245e-05
k__Bacteria;p__Planctomycetes;c__Phycisphaerae;o__MSBL9;f__SG8-4;g__bacterium_enrichment_culture_clone_AOM-SR-B13	3.99245e-05
k__Bacteria;p__Planctomycetes;c__Phycisphaerae;o__Phycisphaerales;f__AKAU3564_sediment_group;g__uncultured_Planctomycetales_bacterium	3.99245e-05
k__Bacteria;p__Planctomycetes;c__Phycisphaerae;o__Pla1_lineage;f__uncultured_organism;g__	3.99245e-05
k__Bacteria;p__Planctomycetes;c__Phycisphaerae;o__mle1-8;f__;g__	3.99245e-05
k__Bacteria;p__Planctomycetes;c__Pla3_lineage;o__uncultured_bacterium;f__<empty>;g__<empty>	3.99245e-05
k__Bacteria;p__Proteobacteria;c__Deltaproteobacteria;o__Desulfovibrionales;f__Desulfomicrobiaceae;g__	3.99245e-05
k__Bacteria;p__Proteobacteria;c__Deltaproteobacteria;o__Desulfuromonadales;f__Desulfuromonadaceae;g__Desulfuromonas	3.99245e-05
k__Bacteria;p__Proteobacteria;c__Deltaproteobacteria;o__Oligoflexales;f__0319-6G20;g__Olavius_ilvae_associated_proteobacterium_Delta_7	3.99245e-05
k__Bacteria;p__Proteobacteria;c__Deltaproteobacteria;o__SAR324_clade(Marine_group_B);f__uncultured_bacterium;g__	3.99245e-05
k__Bacteria;p__Proteobacteria;c__Gammaproteobacteria;o__Legionellales;f__Legionellaceae;g__Legionella	3.99245e-05
k__Bacteria;p__Spirochaetes;c__MVP-15;o__;f__;g__	3.99245e-05
k__Bacteria;p__Verrucomicrobia;c__Verrucomicrobiae;o__Chthoniobacterales;f__Terrimicrobiaceae;g__FukuN18_freshwater_group	3.99245e-05
k__Bacteria;p__WS2;c__uncultured_organism;o__<empty>;f__<empty>;g__<empty>	3.99245e-05
k__Archaea;p__Altiarchaeota;c__Altiarchaeia;o__uncultured_archaeon;f__<empty>;g__<empty>	2.99434e-05
k__Archaea;p__Euryarchaeota;c__Thermoplasmata;o__Marine_Group_II;f__;g__	2.99434e-05
k__Archaea;p__Euryarchaeota;c__Thermoplasmata;o__SG8-5;f__Euryarchaeota_archaeon_SG8-5;g__<empty>	2.99434e-05
k__Archaea;p__Nanoarchaeaeota;c__Woesearchaeia;o__Candidatus_Levybacteria_bacterium_RIFOXYB1_FULL_40_17;f__<empty>;g__	2.99434e-05
k__Bacteria;p__Acidobacteria;c__Aminicenantia;o__Aminicenantales;f__uncultured_organism;g__<empty>	2.99434e-05
k__Bacteria;p__Acidobacteria;c__c5LKS83;o__;f__;g__	2.99434e-05
k__Bacteria;p__Acidobacteria;c__d142;o__uncultured_Acidobacteria_bacterium;f__<empty>;g__<empty>	2.99434e-05
k__Bacteria;p__Acidobacteria;c__d142;o__uncultured_bacterium;f__<empty>;g__	2.99434e-05
k__Bacteria;p__Actinobacteria;c__Acidimicrobiia;o__Actinomarinales;f__Actinomarinaceae;g__Candidatus_Actinomarina	2.99434e-05
k__Bacteria;p__Actinobacteria;c__Actinobacteria;o__Micrococcales;f__Microbacteriaceae;g__	2.99434e-05
k__Bacteria;p__Actinobacteria;c__Rubrobacteria;o__Rubrobacterales;f__Rubrobacteriaceae;g__Rubrobacter	2.99434e-05
k__Bacteria;p__Actinobacteria;c__WCHB1-81;o__uncultured_organism;f__<empty>;g__<empty>	2.99434e-05
k__Bacteria;p__BHI80-139;c__uncultured_candidate_division_BHI80-139_bacterium;o__<empty>;f__<empty>;g__<empty>	2.99434e-05
k__Bacteria;p__Bacteroidetes;c__Bacteroidia;o__Bacteroidales;f__Bacteroidaceae;g__Bacteroides	2.99434e-05
k__Bacteria;p__Bacteroidetes;c__Bacteroidia;o__Bacteroidales;f__Marinilabiliaceae;g__	2.99434e-05
k__Bacteria;p__Bacteroidetes;c__Bacteroidia;o__Bacteroidales;f__SB-5;g__bacterium_YC-LK-LKJ31	2.99434e-05
k__Bacteria;p__Bacteroidetes;c__Bacteroidia;o__Flavobacteriales;f__Flavobacteriaceae;g__Robiginitalea	2.99434e-05
k__Bacteria;p__Bacteroidetes;c__Bacteroidia;o__Sphingobacteriales;f__S15A-MN91;g__	2.99434e-05
k__Bacteria;p__Bacteroidetes;c__Ignavibacteria;o__OPB56;f__uncultured_organism;g__<empty>	2.99434e-05
k__Bacteria;p__Chloroflexi;c__Dehalococcoidia;o__FS117-23B-02;f__uncultured_bacterium;g__<empty>	2.99434e-05
k__Bacteria;p__Chloroflexi;c__Dehalococcoidia;o__t0.6.f;f__;g__	2.99434e-05
k__Bacteria;p__Chloroflexi;c__JG30-KF-CM66;o__;f__;g__	2.99434e-05
k__Bacteria;p__Desantisbacteria;c__Candidatus_Desantisbacteria_bacterium_CG1_02_49_89;o__<empty>;f__<empty>;g__	2.99434e-05
k__Bacteria;p__Elusimicrobia;c__Elusimicrobia;o__Lineage_IV;f__uncultured_bacterium;g__	2.99434e-05
k__Bacteria;p__Elusimicrobia;c__Lineage_IIb;o__;f__;g__	2.99434e-05
k__Bacteria;p__FCPU426;c__uncultured_bacterium;o__<empty>;f__<empty>;g__<empty>	2.99434e-05
k__Bacteria;p__Fibrobacteres;c__Chitinivibrionia;o__uncultured;f__uncultured_bacterium;g__	2.99434e-05
k__Bacteria;p__Firmicutes;c__Clostridia;o__Clostridiales;f__Christensenellaceae;g__	2.99434e-05
k__Bacteria;p__Firmicutes;c__Clostridia;o__Clostridiales;f__Ruminococcaceae;g__GCA-900066225	2.99434e-05
k__Bacteria;p__Gemmatimonadetes;c__MD2902-B12;o__uncultured_organism;f__<empty>;g__	2.99434e-05
k__Bacteria;p__Gemmatimonadetes;c__MD2902-B12;o__uncultured_organism;f__<empty>;g__<empty>	2.99434e-05
k__Bacteria;p__Hydrogenedentes;c__Hydrogenedentia;o__Hydrogenedentiales;f__Hydrogenedensaceae;g__metagenome	2.99434e-05
k__Bacteria;p__Lentisphaerae;c__Lentisphaeria;o__Victivallales;f__BD2-3;g__uncultured_bacterium	2.99434e-05
k__Bacteria;p__Modulibacteria;c__Moduliflexia;o__Moduliflexales;f__Moduliflexaceae;g__	2.99434e-05
k__Bacteria;p__Nitrospinae;c__P9X2b3D02;o__uncultured_bacterium;f__<empty>;g__<empty>	2.99434e-05
k__Bacteria;p__Omnitrophicaeota;c__uncultured_Omnitrophica_bacterium;o__<empty>;f__<empty>;g__<empty>	2.99434e-05
k__Bacteria;p__Omnitrophicaeota;c__uncultured_prokaryote;o__<empty>;f__<empty>;g__<empty>	2.99434e-05
k__Bacteria;p__PAUC34f;c__uncultured_Deferribacteres_bacterium;o__<empty>;f__<empty>;g__<empty>	2.99434e-05
k__Bacteria;p__Patescibacteria;c__Gracilibacteria;o__Candidatus_Peribacteria;f__;g__	2.99434e-05
k__Bacteria;p__Patescibacteria;c__Gracilibacteria;o__uncultured_bacterium;f__<empty>;g__	2.99434e-05
k__Bacteria;p__Patescibacteria;c__Kazania;o__uncultured_bacterium;f__<empty>;g__	2.99434e-05
k__Bacteria;p__Planctomycetes;c__ODP123;o__uncultured_planctomycete;f__<empty>;g__<empty>	2.99434e-05
k__Bacteria;p__Planctomycetes;c__Phycisphaerae;o__B103G10;f__uncultured_bacterium;g__	2.99434e-05
k__Bacteria;p__Planctomycetes;c__Phycisphaerae;o__Pla1_lineage;f__uncultured_bacterium;g__	2.99434e-05
k__Bacteria;p__Planctomycetes;c__Pla3_lineage;o__;f__;g__	2.99434e-05
k__Bacteria;p__Planctomycetes;c__Pla4_lineage;o__uncultured_bacterium;f__<empty>;g__	2.99434e-05
k__Bacteria;p__Planctomycetes;c__vadinHA49;o__uncultured_organism;f__<empty>;g__<empty>	2.99434e-05
k__Bacteria;p__Proteobacteria;c__Alphaproteobacteria;o__Rhizobiales;f__Hyphomicrobiaceae;g__Pedomicrobium	2.99434e-05
k__Bacteria;p__Proteobacteria;c__Alphaproteobacteria;o__Rhizobiales;f__Methyloligellaceae;g__Methyloceanibacter	2.99434e-05
k__Bacteria;p__Proteobacteria;c__Deltaproteobacteria;o__DTB120;f__uncultured_bacterium;g__	2.99434e-05
k__Bacteria;p__Proteobacteria;c__Deltaproteobacteria;o__Desulfovibrionales;f__Desulfovibrionaceae;g__Desulfovibrio	2.99434e-05
k__Bacteria;p__Proteobacteria;c__Deltaproteobacteria;o__Desulfovibrionales;f__Desulfovibrionaceae;g__uncultured	2.99434e-05
k__Bacteria;p__Proteobacteria;c__Deltaproteobacteria;o__Myxococcales;f__BIrii41;g__uncultured_bacterium	2.99434e-05
k__Bacteria;p__Proteobacteria;c__Deltaproteobacteria;o__Oligoflexales;f__0319-6G20;g__uncultured_organism	2.99434e-05
k__Bacteria;p__Proteobacteria;c__Gammaproteobacteria;o__Steroidobacterales;f__Woeseiaceae;g__Woeseia	2.99434e-05
k__Bacteria;p__Schekmanbacteria;c__Candidatus_Schekmanbacteria_bacterium_RIFCSPLOWO2_02_FULL_38_14;o__<empty>;f__<empty>;g__	2.99434e-05
k__Bacteria;p__Verrucomicrobia;c__Verrucomicrobiae;o__Chthoniobacterales;f__Chthoniobacteraceae;g__Candidatus_Udaeobacter	2.99434e-05
k__Bacteria;p__Zixibacteria;c__uncultured_organism;o__<empty>;f__<empty>;g__	2.99434e-05
k__Archaea;p__Asgardaeota;c__Lokiarchaeia;o__uncultured_archaeon;f__<empty>;g__	1.99623e-05
k__Archaea;p__Euryarchaeota;c__Thermoplasmata;o__Marine_Benthic_Group_D_and_DHVEG-1;f__archaeon_enrichment_culture_clone_AOM-Clone-F5;g__<empty>	1.99623e-05
k__Archaea;p__Euryarchaeota;c__Thermoplasmata;o__SG8-5;f__uncultured_archaeon;g__	1.99623e-05
k__Archaea;p__Thaumarchaeota;c__Nitrososphaeria;o__Nitrosopumilales;f__Nitrosopumilaceae;g__Candidatus_Nitrosopumilus	1.99623e-05
k__Bacteria;p__Acidobacteria;c__Acidobacteriia;o__Acidobacteriales;f__Koribacteraceae;g__	1.99623e-05
k__Bacteria;p__Acidobacteria;c__Acidobacteriia;o__Solibacterales;f__Solibacteraceae_(Subgroup_3);g__	1.99623e-05
k__Bacteria;p__Acidobacteria;c__Subgroup_6;o__;f__;g__	1.99623e-05
k__Bacteria;p__Actinobacteria;c__Acidimicrobiia;o__Microtrichales;f__uncultured;g__uncultured_bacterium	1.99623e-05
k__Bacteria;p__Actinobacteria;c__Actinobacteria;o__Corynebacteriales;f__Mycobacteriaceae;g__	1.99623e-05
k__Bacteria;p__Actinobacteria;c__Actinobacteria;o__Frankiales;f__Geodermatophilaceae;g__	1.99623e-05
k__Bacteria;p__Actinobacteria;c__Actinobacteria;o__Micrococcales;f__Dermatophilaceae;g__uncultured	1.99623e-05
k__Bacteria;p__Actinobacteria;c__Actinobacteria;o__Micrococcales;f__Microbacteriaceae;g__DS001	1.99623e-05
k__Bacteria;p__Actinobacteria;c__Actinobacteria;o__Propionibacteriales;f__Nocardioidaceae;g__Nocardioides	1.99623e-05
k__Bacteria;p__Actinobacteria;c__Actinobacteria;o__Pseudonocardiales;f__Pseudonocardiaceae;g__	1.99623e-05
k__Bacteria;p__Actinobacteria;c__RBG-16-55-12;o__uncultured_bacterium;f__<empty>;g__	1.99623e-05
k__Bacteria;p__Actinobacteria;c__Thermoleophilia;o__Solirubrobacterales;f__67-14;g__	1.99623e-05
k__Bacteria;p__BRC1;c__uncultured_soil_bacterium_PBS-III-4;o__<empty>;f__<empty>;g__	1.99623e-05
k__Bacteria;p__Bacteroidetes;c__Bacteroidia;o__Cytophagales;f__Cyclobacteriaceae;g__uncultured	1.99623e-05
k__Bacteria;p__Bacteroidetes;c__Bacteroidia;o__Flavobacteriales;f__Flavobacteriaceae;g__Aureicoccus	1.99623e-05
k__Bacteria;p__Bacteroidetes;c__Bacteroidia;o__Flavobacteriales;f__Flavobacteriaceae;g__NS2b_marine_group	1.99623e-05
k__Bacteria;p__Bacteroidetes;c__Bacteroidia;o__Sphingobacteriales;f__Sphingobacteriaceae;g__	1.99623e-05
k__Bacteria;p__Bacteroidetes;c__Ignavibacteria;o__OPB56;f__uncultured_organism;g__	1.99623e-05
k__Bacteria;p__Bacteroidetes;c__Rhodothermia;o__Balneolales;f__Balneolaceae;g__Balneola	1.99623e-05
k__Bacteria;p__Bacteroidetes;c__Rhodothermia;o__Rhodothermales;f__Rhodothermaceae;g__	1.99623e-05
k__Bacteria;p__Chlamydiae;c__Chlamydiae;o__Chlamydiales;f__Chlamydiaceae;g__uncultured_Chlamydiales_bacterium	1.99623e-05
k__Bacteria;p__Chlamydiae;c__Chlamydiae;o__Chlamydiales;f__Simkaniaceae;g__uncultured	1.99623e-05
k__Bacteria;p__Chlamydiae;c__LD1-PA32;o__uncultured_organism;f__<empty>;g__	1.99623e-05
k__Bacteria;p__Chloroflexi;c__Anaerolineae;o__uncultured_bacterium;f__<empty>;g__	1.99623e-05
k__Bacteria;p__Chloroflexi;c__Dehalococcoidia;o__GIF3;f__uncultured_organism;g__	1.99623e-05
k__Bacteria;p__Chloroflexi;c__Dehalococcoidia;o__MB-C2-126;f__uncultured_bacterium;g__	1.99623e-05
k__Bacteria;p__Chloroflexi;c__Dehalococcoidia;o__SAR202_clade;f__uncultured_Chloroflexi_bacterium;g__	1.99623e-05
k__Bacteria;p__Chloroflexi;c__JG30-KF-CM66;o__uncultured_bacterium;f__<empty>;g__<empty>	1.99623e-05
k__Bacteria;p__Cloacimonetes;c__Cloacimonadia;o__MSBL2;f__metagenome;g__	1.99623e-05
k__Bacteria;p__Cyanobacteria;c__Oxyphotobacteria;o__Chloroplast;f__uncultured_organism;g__<empty>	1.99623e-05
k__Bacteria;p__Deinococcus-Thermus;c__Deinococci;o__Deinococcales;f__Trueperaceae;g__Truepera	1.99623e-05
k__Bacteria;p__Dependentiae;c__Babeliae;o__Babeliales;f__bacterium_enrichment_culture_clone_46;g__	1.99623e-05
k__Bacteria;p__Dependentiae;c__Babeliae;o__Babeliales;f__uncultured_organism;g__	1.99623e-05
k__Bacteria;p__Elusimicrobia;c__4-29;o__uncultured_bacterium;f__<empty>;g__<empty>	1.99623e-05
k__Bacteria;p__Elusimicrobia;c__Lineage_IIc;o__uncultured_bacterium;f__<empty>;g__	1.99623e-05
k__Bacteria;p__Epsilonbacteraeota;c__Campylobacteria;o__Campylobacterales;f__Arcobacteraceae;g__Arcobacter	1.99623e-05
k__Bacteria;p__Epsilonbacteraeota;c__Campylobacteria;o__Campylobacterales;f__Thiovulaceae;g__	1.99623e-05
k__Bacteria;p__Fibrobacteres;c__Chitinivibrionia;o__Chitinivibrionales;f__Chitinivibrionaceae;g__possible_genus_03	1.99623e-05
k__Bacteria;p__Fibrobacteres;c__Fibrobacteria;o__Fibrobacterales;f__SBYC;g__	1.99623e-05
k__Bacteria;p__Firmicutes;c__;o__;f__;g__	1.99623e-05
k__Bacteria;p__Firmicutes;c__Bacilli;o__Bacillales;f__Bacillaceae;g__Aeribacillus	1.99623e-05
k__Bacteria;p__Firmicutes;c__Bacilli;o__Bacillales;f__Paenibacillaceae;g__Cohnella	1.99623e-05
k__Bacteria;p__Firmicutes;c__Bacilli;o__Lactobacillales;f__Streptococcaceae;g__Streptococcus	1.99623e-05
k__Bacteria;p__Firmicutes;c__Clostridia;o__Clostridiales;f__Clostridiaceae_1;g__Clostridium_sensu_stricto_13	1.99623e-05
k__Bacteria;p__Firmicutes;c__Clostridia;o__Clostridiales;f__Lachnospiraceae;g__	1.99623e-05
k__Bacteria;p__Firmicutes;c__Clostridia;o__Clostridiales;f__Peptococcaceae;g__uncultured	1.99623e-05
k__Bacteria;p__Firmicutes;c__Clostridia;o__Clostridiales;f__Peptostreptococcaceae;g__Paeniclostridium	1.99623e-05
k__Bacteria;p__Firmicutes;c__Clostridia;o__Clostridiales;f__Peptostreptococcaceae;g__Proteocatella	1.99623e-05
k__Bacteria;p__Firmicutes;c__Clostridia;o__Clostridiales;f__Ruminococcaceae;g__Ruminococcaceae_UCG-012	1.99623e-05
k__Bacteria;p__Firmicutes;c__Clostridia;o__Clostridiales;f__Ruminococcaceae;g__Sporobacter	1.99623e-05
k__Bacteria;p__Firmicutes;c__Clostridia;o__Clostridiales;f__Ruminococcaceae;g__uncultured	1.99623e-05
k__Bacteria;p__Firmicutes;c__Negativicutes;o__Selenomonadales;f__uncultured;g__	1.99623e-05
k__Bacteria;p__Fusobacteria;c__Fusobacteriia;o__Fusobacteriales;f__Leptotrichiaceae;g__	1.99623e-05
k__Bacteria;p__Gemmatimonadetes;c__BD2-11_terrestrial_group;o__uncultured_bacterium;f__<empty>;g__	1.99623e-05
k__Bacteria;p__Gemmatimonadetes;c__Gemmatimonadetes;o__Gemmatimonadales;f__Gemmatimonadaceae;g__uncultured	1.99623e-05
k__Bacteria;p__Kiritimatiellaeota;c__Kiritimatiellae;o__WCHB1-41;f__uncultured_Verrucomicrobiales_bacterium;g__<empty>	1.99623e-05
k__Bacteria;p__LCP-89;c__uncultured_Deferribacteres_bacterium;o__<empty>;f__<empty>;g__<empty>	1.99623e-05
k__Bacteria;p__Lentisphaerae;c__Lentisphaeria;o__Victivallales;f__Arctic95B-14;g__	1.99623e-05
k__Bacteria;p__Lentisphaerae;c__Oligosphaeria;o__Oligosphaerales;f__Lenti-02;g__Cytophaga_sp._Dex80-64	1.99623e-05
k__Bacteria;p__Nitrospirae;c__Thermodesulfovibrionia;o__uncultured;f__uncultured_bacterium;g__	1.99623e-05
k__Bacteria;p__Omnitrophicaeota;c__Omnitrophia;o__uncultured_bacterium;f__<empty>;g__	1.99623e-05
k__Bacteria;p__Omnitrophicaeota;c__metagenome;o__<empty>;f__<empty>;g__<empty>	1.99623e-05
k__Bacteria;p__PAUC34f;c__;o__;f__;g__	1.99623e-05
k__Bacteria;p__Patescibacteria;c__ABY1;o__Candidatus_Falkowbacteria;f__uncultured_bacterium;g__<empty>	1.99623e-05
k__Bacteria;p__Patescibacteria;c__ABY1;o__Candidatus_Kerfeldbacteria;f__metagenome;g__<empty>	1.99623e-05
k__Bacteria;p__Patescibacteria;c__ABY1;o__Candidatus_Kerfeldbacteria;f__uncultured_bacterium;g__<empty>	1.99623e-05
k__Bacteria;p__Patescibacteria;c__ABY1;o__Candidatus_Komeilibacteria;f__uncultured_bacterium;g__	1.99623e-05
k__Bacteria;p__Patescibacteria;c__ABY1;o__Candidatus_Magasanikbacteria;f__uncultured_organism;g__	1.99623e-05
k__Bacteria;p__Patescibacteria;c__ABY1;o__Candidatus_Magasanikbacteria;f__uncultured_organism;g__<empty>	1.99623e-05
k__Bacteria;p__Patescibacteria;c__Berkelbacteria;o__;f__;g__	1.99623e-05
k__Bacteria;p__Patescibacteria;c__Gracilibacteria;o__Absconditabacteriales_(SR1);f__uncultured_bacterium;g__<empty>	1.99623e-05
k__Bacteria;p__Patescibacteria;c__Gracilibacteria;o__Absconditabacteriales_(SR1);f__uncultured_prokaryote;g__<empty>	1.99623e-05
k__Bacteria;p__Patescibacteria;c__Gracilibacteria;o__Candidatus_Peregrinibacteria;f__uncultured_bacterium;g__	1.99623e-05
k__Bacteria;p__Patescibacteria;c__Gracilibacteria;o__marine_metagenome;f__<empty>;g__	1.99623e-05
k__Bacteria;p__Patescibacteria;c__Gracilibacteria;o__uncultured_Compostimonas_sp.;f__<empty>;g__<empty>	1.99623e-05
k__Bacteria;p__Patescibacteria;c__Microgenomatia;o__Candidatus_Beckwithbacteria;f__uncultured_bacterium;g__	1.99623e-05
k__Bacteria;p__Patescibacteria;c__Microgenomatia;o__Candidatus_Woesebacteria;f__uncultured_bacterium;g__<empty>	1.99623e-05
k__Bacteria;p__Patescibacteria;c__Parcubacteria;o__Candidatus_Nomurabacteria;f__uncultured_bacterium;g__<empty>	1.99623e-05
k__Bacteria;p__Patescibacteria;c__WWE3;o__uncultured_bacterium;f__<empty>;g__<empty>	1.99623e-05
k__Bacteria;p__Planctomycetes;c__;o__;f__;g__	1.99623e-05
k__Bacteria;p__Planctomycetes;c__ODP123;o__uncultured_bacterium;f__<empty>;g__<empty>	1.99623e-05
k__Bacteria;p__Planctomycetes;c__OM190;o__uncultured_Planctomycetales_bacterium;f__<empty>;g__<empty>	1.99623e-05
k__Bacteria;p__Planctomycetes;c__Phycisphaerae;o__CCM11a;f__uncultured_Planctomycetaceae_bacterium;g__	1.99623e-05
k__Bacteria;p__Planctomycetes;c__Phycisphaerae;o__CCM11a;f__uncultured_deep-sea_bacterium;g__<empty>	1.99623e-05
k__Bacteria;p__Planctomycetes;c__Phycisphaerae;o__MSBL9;f__L21-RPul-D3;g__	1.99623e-05
k__Bacteria;p__Planctomycetes;c__Phycisphaerae;o__MSBL9;f__SG8-4;g__uncultured_Planctomycetales_bacterium	1.99623e-05
k__Bacteria;p__Planctomycetes;c__Phycisphaerae;o__Phycisphaerales;f__Phycisphaeraceae;g__JL-ETNP-F27	1.99623e-05
k__Bacteria;p__Planctomycetes;c__Pla4_lineage;o__;f__;g__	1.99623e-05
k__Bacteria;p__Planctomycetes;c__Pla4_lineage;o__uncultured_Planctomycetales_bacterium;f__<empty>;g__<empty>	1.99623e-05
k__Bacteria;p__Planctomycetes;c__Pla4_lineage;o__uncultured_planctomycete;f__<empty>;g__<empty>	1.99623e-05
k__Bacteria;p__Proteobacteria;c__;o__;f__;g__	1.99623e-05
k__Bacteria;p__Proteobacteria;c__Alphaproteobacteria;o__Caulobacterales;f__Hyphomonadaceae;g__	1.99623e-05
k__Bacteria;p__Proteobacteria;c__Alphaproteobacteria;o__Holosporales;f__Holosporaceae;g__	1.99623e-05
k__Bacteria;p__Proteobacteria;c__Alphaproteobacteria;o__Rhizobiales;f__Beijerinckiaceae;g__	1.99623e-05
k__Bacteria;p__Proteobacteria;c__Alphaproteobacteria;o__Rhizobiales;f__Beijerinckiaceae;g__uncultured	1.99623e-05
k__Bacteria;p__Proteobacteria;c__Alphaproteobacteria;o__Rhizobiales;f__Hyphomicrobiaceae;g__Hyphomicrobium	1.99623e-05
k__Bacteria;p__Proteobacteria;c__Alphaproteobacteria;o__Rhizobiales;f__Rhizobiaceae;g__	1.99623e-05
k__Bacteria;p__Proteobacteria;c__Alphaproteobacteria;o__Rhodobacterales;f__Rhodobacteraceae;g__Nautella	1.99623e-05
k__Bacteria;p__Proteobacteria;c__Alphaproteobacteria;o__Rickettsiales;f__Midichloriaceae;g__MD3-55	1.99623e-05
k__Bacteria;p__Proteobacteria;c__Alphaproteobacteria;o__uncultured;f__;g__	1.99623e-05
k__Bacteria;p__Proteobacteria;c__Deltaproteobacteria;o__Bdellovibrionales;f__Bacteriovoracaceae;g__	1.99623e-05
k__Bacteria;p__Proteobacteria;c__Deltaproteobacteria;o__Bdellovibrionales;f__Bdellovibrionaceae;g__	1.99623e-05
k__Bacteria;p__Proteobacteria;c__Deltaproteobacteria;o__Bradymonadales;f__uncultured_Geobacteraceae_bacterium;g__	1.99623e-05
k__Bacteria;p__Proteobacteria;c__Deltaproteobacteria;o__Myxococcales;f__;g__	1.99623e-05
k__Bacteria;p__Proteobacteria;c__Deltaproteobacteria;o__Myxococcales;f__MidBa8;g__	1.99623e-05
k__Bacteria;p__Proteobacteria;c__Deltaproteobacteria;o__Myxococcales;f__VHS-B4-70;g__uncultured_Kofleriaceae_bacterium	1.99623e-05
k__Bacteria;p__Proteobacteria;c__Deltaproteobacteria;o__Myxococcales;f__VHS-B4-70;g__uncultured_bacterium	1.99623e-05
k__Bacteria;p__Proteobacteria;c__Deltaproteobacteria;o__Myxococcales;f__bacteriap25;g__uncultured_delta_proteobacterium	1.99623e-05
k__Bacteria;p__Proteobacteria;c__Deltaproteobacteria;o__Oligoflexales;f__Oligoflexaceae;g__	1.99623e-05
k__Bacteria;p__Proteobacteria;c__Deltaproteobacteria;o__PB19;f__uncultured_marine_bacterium;g__<empty>	1.99623e-05
k__Bacteria;p__Proteobacteria;c__Deltaproteobacteria;o__PB19;f__uncultured_organism;g__<empty>	1.99623e-05
k__Bacteria;p__Proteobacteria;c__Deltaproteobacteria;o__SAR324_clade(Marine_group_B);f__uncultured_delta_proteobacterium;g__	1.99623e-05
k__Bacteria;p__Proteobacteria;c__Deltaproteobacteria;o__Syntrophobacterales;f__Syntrophaceae;g__	1.99623e-05
k__Bacteria;p__Proteobacteria;c__Gammaproteobacteria;o__;f__;g__	1.99623e-05
k__Bacteria;p__Proteobacteria;c__Gammaproteobacteria;o__Betaproteobacteriales;f__Nitrosomonadaceae;g__MND1	1.99623e-05
k__Bacteria;p__Proteobacteria;c__Gammaproteobacteria;o__Coxiellales;f__Coxiellaceae;g__	1.99623e-05
k__Bacteria;p__Proteobacteria;c__Gammaproteobacteria;o__Gammaproteobacteria_Incertae_Sedis;f__Unknown_Family;g__Marinicella	1.99623e-05
k__Bacteria;p__Proteobacteria;c__Gammaproteobacteria;o__Gammaproteobacteria_Incertae_Sedis;f__Unknown_Family;g__uncultured	1.99623e-05
k__Bacteria;p__Proteobacteria;c__Gammaproteobacteria;o__uncultured;f__uncultured_bacterium;g__	1.99623e-05
k__Bacteria;p__Spirochaetes;c__Spirochaetia;o__Spirochaetales;f__Spirochaetaceae;g__uncultured	1.99623e-05
k__Bacteria;p__Verrucomicrobia;c__Verrucomicrobiae;o__Verrucomicrobiales;f__DEV007;g__uncultured_bacterium	1.99623e-05
k__Bacteria;p__WOR-1;c__uncultured_prokaryote;o__<empty>;f__<empty>;g__<empty>	1.99623e-05
k__Bacteria;p__WS2;c__uncultured_bacterium;o__<empty>;f__<empty>;g__	1.99623e-05
k__Bacteria;p__Zixibacteria;c__uncultured_candidate_division_TA06_bacterium;o__<empty>;f__<empty>;g__	1.99623e-05
k__Bacteria;p__Zixibacteria;c__uncultured_delta_proteobacterium;o__<empty>;f__<empty>;g__	1.99623e-05
k__Bacteria;p__Zixibacteria;c__uncultured_organism;o__<empty>;f__<empty>;g__<empty>	1.99623e-05
